# Supplementary material for: Identification of differentially expressed gene modules in heterogeneous diseases
Source: Oxford University Press journal article supplement (doi:10.1093/bioinformatics/btaa1038), 2020-12-02
Supplement: btaa1038_supplementary_data.zip [file btaa1038_supplementary_data.zip]

Archive with 2 entries (2 files):
- Supplementary_Figures_and_Text.pdf
- Supplementary_Tables.xlsx
