# Supplementary material for: Identification of differentially expressed gene modules in heterogeneous diseases
Source: Oxford University Press journal article supplement (doi:10.1093/bioinformatics/btaa1038), 2020-12-02
Supplement: btaa1038_supplementary_data.zip [file btaa1038_supplementary_data.zip › Supplementary_Tables.xlsx]

## Sheet: S1 Related works
method	output	data transformation	deterministic	prior knowledge	requires to specify the expected number of biclusters	sources
Cheng & Church	biclusters with constant values	none	yes	not used	yes	biclust R lib
xMOTIFs	coherent and constant biclusters	discretization	no	not used	no	biclust R lib
QUBIC	nonzero constant biclusters	discretization	yes	network (optional)	yes	biclust R lib
Plaid	additive biclusters with coherent values	none	no	not used	yes	biclust R lib
Fabia	multiplicative biclusters with coherent values	none	no	not used	yes	biclust R lib
ISA2	biclusters with row and columns averages above or below thresholds	none	no	not used	no	ISA2 R lib
DeBi	differentially expressed biclusters	binarization	yes	not used	no	JbiclustGE
COALESCE	up- and down-regulated biclusters	none	no	motifs (optional)	no	JbiclustGE
BiBit	binary biclusters	binarization	no	not used	max. number (optional)	JbiclustGE
DESMOND	Gene modules – differentially expressed network-constrained biclusters	considers non-transformed data and data binarized using flexible thresholds	no	network (mandatory)	no	github
Table S1. The comparison of DESMOND and its baselines.

## Sheet: S2 Parameters
	parameter values tested	optimal parameters	with optimal parameters				with default parameters
method			Relevance	Recovery	Geometric mean	Number of biclusters on average	Relevance	Recovery	Geometric mean	Number of biclusters on average
DeBi	b =[0.5, 0.75, 1.0, 1.25, 1.5, 2.0, 2.5] o = [0.5, 0.75, 1.0]	b = 1.5, o=0.5	0.214	0.374	0.28	51.5	0.026	0.426	0.102	614.0
ISA2	no.seeds = [2,5,10, 20, ..., 100, 125, 150, 200] thr.row* = [0.5, 1.0, 1.5, 2.0] thr.column* = [0.5, 1.0, 1.5, 2.0]	no.seeds = 20	0.222	0.522	0.33	58.9	0.147	0.586	0.284	203.7
xMOTIFs	discritization_levels = [2, 3, 5,10,15, 20, 30, 40, 50] alpha = [0.001, 0.01, 0.05, 0.10, 0.15] ns = [5, 10, 25, 50, 100]	discr_levels=5; alpha=0.1; ns=100;	0.088	0.08	0.084	2019-01-09	0.051	0.046	0.084	10.0
Cheng & Church	alpha =[1.0, 1.1, 1.2, 1.3, 1.4, 1.5] delta = [0.1,0.2, ... , 1.0]	alpha=1.4; delta=1.0;	0.032	0.034	0.033	2019-09-04	0.028	0.032	0.03	2019-08-04
Plaid	row.release = [0.5, 0.55, 0.60, 0.65, 0.7] col.release = [0.5, 0.55, 0.60, 0.65, 0.7] back_fit_values = [0,10,100] iter_startup_values = [5, 10,100,1000] iter_layer_values = [10,100,200,500,1000]	row_release=0.5; col_release=0.55; back_fit=10; iter_startup=100; iter_layer=100;	0.148	0.052	0.082	2019-05-01	0.028	0.005	0.011	0.4
FABIA	alpha = [ 0.005, 0.01, 0.05, 0.1, 0.5] spl = [0, 0.5, 0.75, 1.0, 1.5, 2.0] spz = [0, 0.5, 0.75, 1.0, 1.5, 2.0]	alpha=0.05; spl=0.5; spz=0.75;	0.536	0.539	0.537	2019-02-10	0.38	0.383	0.382	10.0
COALESCE	prob_gene = [0.99, 0.95, 0.9] pvalue_cond = [0.01, 0.05, 0.1] pvalue_correl = [0.01, 0.05, 0.1, 0.2] zscore_cond = [0.005, 0.01, 0.05, 0.1]	prob_gene=0.95; pvalue_cond=0.1; pvalue_correl=0.5; zscore_cond=0.05;	0.722	0.72	0.716	11.0	0.633	0.63	0.629	2019-05-10
QUBIC	r(discritization_levels) = [1, 2, 3, 4, 5, 7,10] q = [0.05,0.06, 0.1, 0.25, 0.5] c = [0.5, 0.65, 0.70, 0.75, 0.8, 0.85, 0.9, 0.95] P = [TRUE, FALSE] with or without network	r=1; q=0.25; c=0.65; P=F; network	0.351	0.322	0.336	10.0	0.05	0.031	0.039	10
BiBit	maximum_number_of_biclusters_to_find=[0,10,15,100] pattern_size_to_use_in_the_encoding_phase=[8,16,32] maximum_value_in_the_discretized_dataset=[0.5,1.0,1.5,2.0]	maximum_number_of_biclusters_to_find=100 pattern_size_to_use_in_the_encoding_phase=16; maximum_value_in_the_discretized_dataset=1	0.004	0.011	0.006	100	NA	NA	NA	outputs ~10^5 biclulsters with default parameters
DESMOND	alpha = [5.0, 1.0, 0.5, 0.1, 0.05] beta/K = [10000, 1.0, 0.0001] RRHO_pval_threshold = [0.001, 0.005, 0.01,0.05] Q = [0.25, 0.5, 0.75] s_min=5	alpha = 0.5; RRHO_pval_threshold = 0.01; q = 0.5	0.616	0.669	0.635	2019-02-08	NA	NA	NA	NA
Table S2. The results of hyperparameter tuning on synthetic datasets. In case of ties (e.g. for DeBi and BiBit), parameter combinations that are closer to the defaultis chosen. Default parameter values are highlighted by bold text font. ISA2 accepts several row and columns thresholds column thresholds and automatically determines the most appropriate combination of parameters marked by *.

## Sheet: S3A Performance
(genes, samples) / method	para- meters	(5,10)	(5,20)	(5,50)	(5,100)	(10,10)	(10,20)	(10,50)	(10,100)	(20,10)	(20,20)	(20,50)	(20,100)	(50,10)	(50,20)	(50,50)	(50,100)	(100,10)	(100,20)	(100,50)	(100,100)	average over all cases	average for biclusters >10 samples
DeBi	O	0.12	0.18	0.17	0.20	0.36	0.30	0.28	0.21	0.43	0.40	0.35	0.27	0.41	0.45	0.26	0.21	0.39	0.31	0.18	0.12	0.28	0.26
DeBi	D	0.03	0.05	0.04	0.04	0.06	0.08	0.08	0.08	0.10	0.10	0.10	0.12	0.13	0.13	0.11	0.14	0.19	0.15	0.13	0.18	0.10	0.10
ISA2	O	0.01	0.03	0.06	0.05	0.06	0.12	0.16	0.14	0.22	0.31	0.35	0.30	0.61	0.65	0.48	0.43	0.84	0.89	0.50	0.40	0.33	0.32
ISA2	D	0.01	0.05	0.08	0.06	0.10	0.12	0.15	0.14	0.22	0.25	0.30	0.29	0.52	0.46	0.38	0.38	0.71	0.70	0.42	0.34	0.28	0.27
xMOTIFs	O	0.00	0.01	0.30	0.41	0.00	0.03	0.20	0.26	0.01	0.04	0.12	0.12	0.01	0.03	0.05	0.03	0.01	0.02	0.02	0.01	0.08	0.11
xMOTIFs	D	0.00	0.01	0.10	0.28	0.00	0.01	0.09	0.18	0.00	0.01	0.07	0.09	0.01	0.01	0.03	0.02	0.00	0.01	0.01	0.01	0.05	0.06
Cheng & Church	O	0.00	0.01	0.02	0.08	0.00	0.01	0.02	0.10	0.00	0.00	0.02	0.10	0.00	0.00	0.02	0.13	0.00	0.01	0.01	0.11	0.03	0.04
Cheng & Church	D	0.00	0.01	0.02	0.08	0.00	0.01	0.02	0.08	0.00	0.00	0.02	0.08	0.00	0.01	0.02	0.10	0.00	0.01	0.01	0.13	0.03	0.04
Plaid	O	0.00	0.00	0.00	0.00	0.00	0.00	0.00	0.02	0.01	0.05	0.15	0.00	0.01	0.22	0.31	0.02	0.23	0.35	0.26	0.00	0.08	0.09
Plaid	D	0.00	0.00	0.00	0.00	0.00	0.00	0.00	0.00	0.00	0.00	0.01	0.00	0.02	0.07	0.01	0.00	0.07	0.04	0.01	0.00	0.01	0.01
FABIA	O	0.00	0.02	0.22	0.54	0.03	0.25	0.81	0.94	0.23	0.66	0.97	0.89	0.45	0.80	0.82	0.76	0.43	0.70	0.62	0.60	0.54	0.64
FABIA	D	0.00	0.00	0.02	0.05	0.00	0.02	0.18	0.40	0.02	0.22	0.80	0.66	0.23	0.75	0.98	0.49	0.63	0.97	0.97	0.25	0.38	0.45
COALESCE	O	0.00	0.84	0.85	0.12	0.60	1.00	0.98	0.25	0.89	0.99	1.00	0.41	0.94	1.00	0.92	0.60	0.96	1.00	0.62	0.36	0.72	0.73
COALESCE	D	0.00	0.61	0.81	0.11	0.00	1.00	0.98	0.21	0.00	1.00	1.00	0.40	0.90	1.00	0.96	0.60	0.96	1.00	0.65	0.41	0.63	0.72
QUBIC	O	0.00	0.07	0.45	0.07	0.01	0.46	0.50	0.09	0.01	0.73	0.75	0.06	0.22	0.92	0.58	0.04	0.22	0.92	0.60	0.02	0.34	0.42
QUBIC	D	0.05	0.19	0.10	0.00	0.07	0.09	0.05	0.00	0.04	0.06	0.03	0.00	0.02	0.03	0.01	0.00	0.01	0.02	0.01	0.00	0.04	0.04
BiBit	O	0.00	0.00	0.01	0.02	0.01	0.00	0.01	0.01	0.00	0.01	0.01	0.01	0.00	0.00	0.00	0.01	0.00	0.00	0.00	0.01	0.01	0.01
BiBit	D	0.00	0.00	0.01	0.01	0.00	0.00	0.00	0.01	0.00	0.00	0.00	0.00	0.00	0.00	0.00	0.00	0.00	0.00	0.00	0.00	0.00	0.00
DESMOND	O	0.0	0.54	0.82	0.92	0.12	0.75	0.91	0.9	0.21	0.78	0.93	0.85	0.23	0.68	0.89	0.80	0.24	0.64	0.8	0.70	0.64	0.79
D - default parameters, O - optimized parameters, when the average performance over all bicluster size is maximal
Table S3A. Performance scores computed for biclusters found by each method on synthetic datasets.

## Sheet: S3B Relevance
(genes, samples) / method	para- meters	(5,10)	(5,20)	(5,50)	(5,100)	(10,10)	(10,20)	(10,50)	(10,100)	(20,10)	(20,20)	(20,50)	(20,100)	(50,10)	(50,20)	(50,50)	(50,100)	(100,10)	(100,20)	(100,50)	(100,100)
DeBi	O	0.132498	0.184755	0.126715	0.17155	0.300561	0.255539	0.220503	0.15013	0.339843	0.326655	0.282802	0.208872	0.248309	0.33623	0.193139	0.168355	0.224841	0.193858	0.128928	0.087274
DeBi	D	0.005452	0.008569	0.008413	0.007467	0.010429	0.017497	0.018446	0.016858	0.021585	0.019417	0.02049	0.028723	0.033626	0.0318	0.023303	0.034949	0.06656	0.043009	0.038484	0.062013
ISA2	O	0.005777	0.02289	0.039744	0.036349	0.041507	0.062908	0.079324	0.077225	0.120417	0.170363	0.17087	0.14489	0.45374	0.459268	0.265034	0.212628	0.765977	0.809071	0.292667	0.202262
ISA2	D	0.005562	0.034771	0.046132	0.04009	0.047587	0.051634	0.060876	0.066074	0.090775	0.1046	0.110687	0.108875	0.31935	0.221127	0.154495	0.150951	0.519888	0.493965	0.183419	0.127576
xMOTIFs	O	0	0.018231	0.31884	0.412672	0.00338	0.033792	0.221078	0.263086	0.005105	0.04389	0.136538	0.128407	0.007167	0.028782	0.053309	0.037081	0.009173	0.016942	0.019829	0.00908
xMOTIFs	D	0.001294	0.010846	0.100323	0.289289	0.001293	0.01308	0.095541	0.194597	0.002169	0.012857	0.078864	0.092541	0.005039	0.011394	0.035882	0.024839	0.003624	0.013817	0.015774	0.007063
Cheng & Church	O	0	0.005105	0.022128	0.086876	0.002739	0.011058	0.02194	0.103706	0.002587	0.004079	0.017832	0.099294	0.002641	0.004926	0.019427	0.11539	0.002851	0.004949	0.010353	0.095767
Cheng & Church	D	0	0.008746	0.023451	0.086869	0.002685	0.011058	0.018751	0.08183	0.002512	0.004079	0.022023	0.077305	0.002641	0.004918	0.016223	0.080935	0.002831	0.004943	0.009272	0.102025
Plaid	O	0	0	0	0.005369	0	0	0	0.04204	0.031567	0.16	0.282154	0.006136	0.015415	0.511876	0.54581	0.037292	0.330404	0.560619	0.415475	0.00997
Plaid	D	0	0	0	0	0	0	0	0	0	0	0.0312	0	0.078	0.192794	0.02402	0	0.116894	0.092074	0.01862	0
FABIA	O	0.002991	0.021422	0.211802	0.538112	0.024819	0.244234	0.80346	0.937864	0.222446	0.660647	0.973989	0.889284	0.454855	0.797523	0.824984	0.762	0.425426	0.696827	0.622	0.6008
FABIA	D	0.001674	0.003367	0.016551	0.05053	0.004064	0.016095	0.17633	0.394969	0.019768	0.218087	0.79537	0.662646	0.233009	0.746163	0.984176	0.487874	0.62506	0.966242	0.973018	0.230688
COALESCE	O	0	0.889683	0.850824	0.098474	0.952273	0.995238	0.979141	0.219097	0.939057	0.990476	0.998039	0.397821	0.940998	0.996039	0.873603	0.570788	0.961	0.996	0.529504	0.26308
COALESCE	D	0	0.86	0.814275	0.105945	0	0.995238	0.982988	0.188469	0	1	0.998039	0.381036	0.946626	0.998	0.960194	0.57178	0.961	0.996	0.565822	0.339025
QUBIC	O	0.000717	0.014146	0.47818	0.092895	0.008446	0.002703	0.663419	0.099182	0.007421	0.650975	0.788136	0.110487	0.007837	0.919692	0.67092	0.044155	0.228594	0.9226	0.58878	0.02115
QUBIC	D	0.031034	0.231821	0.120088	0	0.050606	0.136526	0.069844	0.002657	0.053436	0.100139	0.039878	0.001138	0.036881	0.0513	0.01984	0.000716	0.0177	0.02895	0.01024	0.000269
BiBit	O	0.001232	0.001666	0.008301	0.011329	0.003406	0.001577	0.004088	0.005651	0.001673	0.011263	0.003652	0.005065	0.001768	0.00189	0.001825	0.00402	0.001004	0.001314	0.001967	0.00322
BiBit	D	0	0	0.007207	0.01265	0	0	0.001569	0.007859	0.002343	0.008678	0.003545	0.004841	0.001553	0.001379	0.002141	0.004618	0.000983	0.001834	0.002927	0.001974
DESMOND	O	0	0.708197	0.827898	0.921093	0.36396	0.766944	0.91218	0.897347	0.350276	0.775258	0.933571	0.849779	0.313543	0.67567	0.89188	0.801872	0.252566	0.642523	0.796416	0.695751
Table S3B. Relevance scores computed for biclusters found by each method on synthetic datasets.

## Sheet: S3C Recovery
(genes, samples) / method	para- meters	(5,10)	(5,20)	(5,50)	(5,100)	(10,10)	(10,20)	(10,50)	(10,100)	(20,10)	(20,20)	(20,50)	(20,100)	(50,10)	(50,20)	(50,50)	(50,100)	(100,10)	(100,20)	(100,50)	(100,100)
DeBi	O	0.106077	0.169741	0.232315	0.238061	0.433688	0.342494	0.35776	0.305937	0.551596	0.497314	0.421571	0.349461	0.681735	0.597006	0.359867	0.268375	0.662301	0.498357	0.24436	0.1609
DeBi	D	0.158998	0.275444	0.229341	0.269465	0.335862	0.393693	0.366746	0.389537	0.448071	0.505869	0.480664	0.489946	0.527617	0.544778	0.529435	0.574016	0.529048	0.495357	0.442737	0.524698
ISA2	O	0.007185	0.033509	0.084966	0.063923	0.093909	0.213953	0.310122	0.244627	0.407819	0.578628	0.718812	0.633375	0.824428	0.909819	0.864265	0.881197	0.928238	0.973272	0.866934	0.795685
ISA2	D	0.010109	0.071561	0.137787	0.098164	0.207787	0.277849	0.345744	0.312636	0.51679	0.617599	0.787977	0.797746	0.851488	0.95947	0.937172	0.978256	0.97641	0.98603	0.965976	0.87998
xMOTIFs	O	0	0.011952	0.278875	0.411844	0.002714	0.030927	0.181257	0.257971	0.005056	0.035259	0.109632	0.113964	0.006428	0.02428	0.040819	0.028862	0.008826	0.015655	0.017164	0.008532
xMOTIFs	D	0.001411	0.010009	0.095827	0.275231	0.001293	0.012087	0.08396	0.175885	0.002377	0.012278	0.063795	0.07937	0.006114	0.010818	0.029406	0.020046	0.003775	0.011951	0.01365	0.006774
Cheng & Church	O	0	0.00565	0.020772	0.069744	0.001763	0.007258	0.019651	0.096995	0.002141	0.003397	0.018797	0.103941	0.002157	0.005073	0.018036	0.156386	0.002971	0.005494	0.014841	0.127643
Cheng & Church	D	0	0.005959	0.022578	0.069724	0.001833	0.007258	0.017013	0.085158	0.002071	0.003397	0.018981	0.084141	0.002157	0.005267	0.020583	0.116305	0.003025	0.005486	0.009634	0.155002
Plaid	O	0	0	0	0.000537	0	0	0	0.01446	0.003278	0.016	0.093477	0.001213	0.002235	0.103818	0.18901	0.00908	0.157792	0.256858	0.193233	0.00216
Plaid	D	0	0	0	0	0	0	0	0	0	0	0.00508	0	0.007845	0.0225	0.003908	0	0.038108	0.019762	0.001862	0
FABIA	O	0.00331	0.024569	0.224077	0.550275	0.025415	0.255925	0.811168	0.937864	0.230811	0.660647	0.973989	0.889284	0.454855	0.797523	0.824984	0.762	0.425426	0.696827	0.622	0.6058
FABIA	D	0.001897	0.003996	0.020201	0.054414	0.003993	0.017668	0.177215	0.395583	0.023409	0.218087	0.79537	0.662682	0.233009	0.746163	0.984176	0.496274	0.62506	0.966242	0.973018	0.265945
COALESCE	O	0	0.800714	0.850824	0.136107	0.380909	0.995238	0.979141	0.279256	0.845152	0.990476	0.998039	0.431788	0.940998	0.996039	0.960194	0.621454	0.961	0.996	0.737512	0.495611
COALESCE	D	0	0.43	0.814275	0.10589	0	0.995238	0.982988	0.237764	0	1	0.998039	0.413325	0.853471	0.998	0.960194	0.622545	0.961	0.996	0.737512	0.498295
QUBIC	O	0.000717	0.014146	0.445905	0.079115	0.007888	0.004036	0.404163	0.067752	0.006609	0.649476	0.634713	0.058803	0.008029	0.834733	0.618229	0.027925	0.211262	0.836634	0.542425	0.013633
QUBIC	D	0.031034	0.144064	0.090294	0	0.050606	0.074316	0.035005	0.002364	0.032465	0.051139	0.0204	0.001138	0.027924	0.021385	0.00632	0.000676	0.013743	0.017849	0.00524	0.000219
BiBit	O	0.012321	0.012344	0.024006	0.02805	0.016681	0.011627	0.012876	0.016865	0.009342	0.012845	0.010552	0.015789	0.003509	0.004231	0.005041	0.011932	0.001578	0.002035	0.005199	0.010007
BiBit	D	0	0	0.007207	0.010889	0	0	0.001569	0.007663	0.002808	0.002414	0.003341	0.004002	0.001747	0.001379	0.002218	0.004591	0.000984	0.001487	0.002924	0.001873
DESMOND	O	0	0.408385	0.809262	0.921093	0.036396	0.741215	0.91218	0.897347	0.129531	0.775258	0.933571	0.849779	0.166244	0.67567	0.89188	0.801872	0.236216	0.642523	0.804005	0.695751
Table S3C. Recovery scores computed for biclusters found by each method on synthetic datasets.

## Sheet: S4 Overrepresentation of connected and disconnecred gene sets
dataset	% biclusters with more than 3 genes in MIS	fraction of genes in MIS on average	database	fraction of significantly overlapping gene sets
				complete with MIS>3	disconnected (MIS only)
TCGA-micro	21.5	0.531	GOBP	0.893	0.786
			GOMF	0.702	0.452
			GOCC	0.702	0.476
			KEGG	0.643	0.429
TCGA-RNAseq	24.8	0.5	GOBP	0.931	0.751
			GOMF	0.794	0.46
			GOCC	0.714	0.455
			KEGG	0.651	0.444
METABRIC	22.6	0.503	GOBP	0.9	0.68
			GOMF	0.7	0.48
			GOCC	0.68	0.43
			KEGG	0.67	0.38
Table S4. Gene set overrepresentation computed for complete and disconnected gene sets defined by biclusters found by DESMOND. Turning a connected subnetwork into a set of disconnected genes is related to the problem of finding the maximal independent set (MIS) of nodes in the network. Since the MIS detection problem is NP-hard, we have used the approximation algorithm proposed by (Boppana & Hall…

## Sheet: S5 GO Enrichment
		GOBP	GOCC	GOMF	KEGG
METABRIC	Real data	0.8	0.58	0.62	0.56
	Star-shaped random subnetworks	0.57±0.02	0.27±0.02	0.35±0.02	0.24±0.02
	chain-shaped random subnetworks	0.52±0.02	0.25±0.02	0.31±0.02	0.15±0.02
TCGA-RNAseq	Real data	0.78	0.49	0.55	0.5
	Star-shaped random subnetworks	0.56±0.02	0.27±0.01	0.34±0.02	0.24±0.02
	chain-shaped random subnetworks	0.50±0.02	0.24±0.01	0.30±0.02	0.14±0.01
TCGA-micro	Real data	0.84	0.61	0.63	0.65
	Star-shaped random subnetworks	0.55±0.02	0.25±0.02	0.33±0.02	0.23±0.02
	chain-shaped random subnetworks	0.51±0.03	0.23±0.02	0.30±0.02	0.14±0.02
Table S5. The proportion of randomly chosen subnetworks significantly overlapping with at least one gene set from databases.

## Sheet: S6 OS-associated bicsluters
method	parameters	dataset	OS_coef	n_genes	n_samples	avgSNR	direction	genes	samples	OS_coef_CI	OS_pval	OS_pval_BH	subtype	is_complement	subt_pval_BH	subt_overlap	subt_Js
COALESCE	default	METABRIC	0.656159	14	82	0.519167		SOCS7 PCGF2 PF4V1 FBXL20 MLLT6 RPL23 ARHGAP23 SLC6A13 GLI1 MED1 LASP1 PSMB3 GPR27 PIP4K2B	MB-4724 MB-4725 MB-4858 MB-4601 MB-4935 MB-5483 MB-6105 MB-4729 MB-4644 MB-6363 MB-3488 MB-2517 MB-5172 MB-0663 MB-3103 MB-5078 MB-5174 MB-5019 MB-3360 MB-4127 MB-7020 MB-5186 MB-0294 MB-6314 MB-7187 MB-0113 MB-0465 MB-4643 MB-0378 MB-0314 MB-4879 MB-0236 MB-0165 MB-7001 MB-6337 MB-3361 MB-0230 MB-7050 MB-5231 MB-7082 MB-6116 MB-7264 MB-4317 MB-4688 MB-7088 MB-2895 MB-7135 MB-5414 MB-5063 MB-3470…	(0.32443088925839736, 0.9878865903547038)	0.000105833	0.00592664	Her2	F	4.36e-20	44	0.17
COALESCE	optimized	TCGA-RNAseq	1.05974	1093	40	0.580796		UBE2Q1 ZDHHC15 DUOXA2 RYK MFGE8 ZDHHC14 REM1 PRKAG3 PRKAG2 ZDHHC18 CDRT4 ANP32E MFAP2 SHANK2 GPM6B SNAPC3 LEMD1 SEMA4G C10orf111 NCAN ACTG2 DISC1 UCHL1 C17orf74 PCBP4 GABARAP SLC34A2 MEMO1 HEBP2 NRBF2 IRX1 TNNT2 RAB9A SLITRK5 TCOF1 JRKL SIRPA WIPI2 RNASEH1 SMR3B SLC45A3 C16orf13 PELP1 FXR1 FOXL1 IQCG IFRD1 IFRD2 OCA2 MUC16 MUC15 RAB40B CXCL16 PODXL SHFM1 PRRG1 ODAM TRAPPC1 CLDN4 LTV1 POLR3D DDX47…	TCGA-D8-A1JM-01 TCGA-B6-A402-01 TCGA-B6-A0RE-01 TCGA-A7-A13D-01 TCGA-E2-A1LK-01 TCGA-A2-A04U-01 TCGA-A2-A3XU-01 TCGA-AO-A0JL-01 TCGA-E2-A14N-01 TCGA-E2-A158-01 TCGA-BH-A18G-01 TCGA-AO-A129-01 TCGA-AO-A0J6-01 TCGA-EW-A1P8-01 TCGA-A7-A13E-01 TCGA-E2-A573-01 TCGA-B6-A3ZX-01 TCGA-B6-A1KF-01 TCGA-A2-A0T0-01 TCGA-A7-A5ZV-01 TCGA-B6-A0WX-01 TCGA-GI-A2C9-01 TCGA-AO-A12F-01 TCGA-E9-A244-01 TCGA-A7-A0DA-01…	(0.4575941289501001, 1.6618894490947942)	0.000561808	0.0303376	Basal	F	7.86e-26	33	0.19
DeBi	default	TCGA-RNAseq	0.92524	445	62	0.592875	UP	ZCCHC11 EXO1 NCBP1 ZDHHC13 ANP32E RARS2 PPP3R1 GPR180 ESPL1 PRIM2 DHX9 NUP98 WRN IFRD1 OPA1 DEPDC1B ZNF670 GTSE1 DDX47 PPP1R14C CEP76 ZNF778 C5orf34 STARD7 HSD17B12 ZNF195 ELAVL1 DTL RRP1B LSM14A GTF3C3 POLR1A RC3H2 GTF3C4 XPO1 CHCHD3 BMS1 XPO5 TBC1D23 TTL XPOT SENP6 SENP5 NCAPD2 NCAPD3 BLM GDI2 GART ARL5B PSIP1 VASH2 DCUN1D1 ATAD5 MTHFD1L UTP20 SERBP1 RECQL FOXC1 POLQ PRKDC FOXM1 MTIF2 CDC123 CD…	TCGA-AC-A23H-01 TCGA-AO-A1KS-01 TCGA-AR-A1AH-01 TCGA-AR-A1AI-01 TCGA-A2-A1G1-01 TCGA-A7-A26G-01 TCGA-A2-A0T3-01 TCGA-A2-A04U-01 TCGA-BH-A0C7-01 TCGA-BH-A18R-01 TCGA-AR-A1AR-01 TCGA-E2-A14N-01 TCGA-EW-A1P8-01 TCGA-A8-A07C-01 TCGA-A8-A08L-01 TCGA-D8-A1Y0-01 TCGA-AR-A0TZ-01 TCGA-E2-A1II-01 TCGA-C8-A27B-01 TCGA-D8-A27F-01 TCGA-A7-A26J-01 TCGA-B6-A0X1-01 TCGA-A7-A4SD-01 TCGA-HN-A2NL-01 TCGA-AR-A1AY-01…	(0.4084732958337337, 1.442006204420975)	0.000449458	0.0434591	Basal	F	9.69e-12	34	0.17
DeBi	default	TCGA-RNAseq	1.09479	200	55	0.605618	UP	EXO1 LRPPRC ZFR PPP2R3A PRPF4B LRRC40 ANP32E PMS1 NUDT21 SLC30A6 RFWD3 B3GNT5 LBR AEBP2 GPR180 CXorf56 DSC2 EML4 GOPC TAF4B CBFB MTMR8 HDAC2 C3orf17 MBNL3 CCDC18 CUL2 DHX9 BRCA2 CENPI R3HDM1 CLCN5 BAZ1A NKRF THOC2 DEPDC1B SYNCRIP UBE4A LIN9 POLR3G FAM135A YEATS2 DDX6 KPNA3 XRN1 CCNC ABCE1 STARD7 NUP205 ZNF195 C21orf91 C12orf4 UBE2D1 GOLT1B RNGTT TIMM8A SAP130 XPO1 STIL SMURF2 XPO5 CLEC7A CCNE1 PO…	TCGA-AO-A1KS-01 TCGA-AR-A1AR-01 TCGA-AR-A1AH-01 TCGA-AR-A1AI-01 TCGA-A2-A1G1-01 TCGA-A7-A26G-01 TCGA-D8-A147-01 TCGA-BH-A1FM-01 TCGA-E2-A158-01 TCGA-AN-A0XU-01 TCGA-A2-A0CM-01 TCGA-C8-A12Q-01 TCGA-BH-A0B7-01 TCGA-E2-A1II-01 TCGA-B6-A0RT-01 TCGA-D8-A27F-01 TCGA-A8-A06U-01 TCGA-AQ-A04J-01 TCGA-A2-A0T0-01 TCGA-EW-A1PD-01 TCGA-C8-A1HK-01 TCGA-GM-A2DH-01 TCGA-E2-A1AZ-01 TCGA-A1-A0SK-01 TCGA-E9-A243-01…	(0.5620977910130721, 1.6274863354829145)	5.62262e-05	0.0157058	Basal	F	1.34e-08	28	0.14
DeBi	default	TCGA-RNAseq	0.95711	153	62	0.636616	UP	RNF14 ZCCHC10 HSPA4 HSPA9 FCHO2 CHMP2B PI4K2B SLC30A5 SLC30A7 SLC30A6 KIF2A ZNF148 ZFYVE16 BCLAF1 RARS PHC3 BDP1 LMBRD2 ENTPD7 LARP1 LARP4 SCAMP1 SRFBP1 COG5 TRIM23 SEC24D MON2 EDEM3 DHX29 UBR2 UBR1 CEP350 KRAS TOR1AIP2 YIPF5 UBE4A MBTPS2 PPP2CA ZNF449 ARCN1 ZNF678 PGGT1B COPB1 MFAP3 SPTY2D1 SKIV2L2 YIPF6 FBXW11 C16orf72 MED23 MATR3 ZFP91 RICTOR ATP7A CCDC125 AFF4 TBC1D23 PIK3R4 FBXL17 TBC1D8B PJ…	TCGA-AO-A1KS-01 TCGA-A7-A26E-01 TCGA-D8-A1JE-01 TCGA-A1-A0SN-01 TCGA-A7-A26J-01 TCGA-BH-A0EE-01 TCGA-BH-A0B1-01 TCGA-BH-A1EV-01 TCGA-AR-A255-01 TCGA-BH-A1FM-01 TCGA-D8-A1JG-01 TCGA-C8-A12Q-01 TCGA-AR-A252-01 TCGA-A8-A09Z-01 TCGA-BH-A0BA-01 TCGA-A8-A0A6-01 TCGA-C8-A12Z-01 TCGA-D8-A1X9-01 TCGA-D8-A1JJ-01 TCGA-AR-A0TR-01 TCGA-EW-A1P5-01 TCGA-D8-A1J9-01 TCGA-AR-A1AV-01 TCGA-D8-A1XU-01 TCGA-AR-A24V-01…	(0.42974438903949175, 1.4844751995601038)	0.000374946	0.0409833	Basal	T	0.000357	170	0.18
DeBi	default	TCGA-RNAseq	1.23888	142	62	0.594465	UP	SYCP2L CCNE1 PLK1 SYMPK PKMYT1 AKT2 TOMM40 DHX16 KIF2C CALM3 C19orf47 C19orf48 SUPT5H PRPF31 GRWD1 ESPL1 LIG1 ZNF576 WDR62 ZNF473 IRAK1 WDR5 CDKN2A TRIM28 PRMT1 CAMKV HTR6 YIF1B KIFC1 PSRC1 SNRPD2 SNRPD1 GSK3A H2AFZ POP1 NCAPH TROAP YBX1 XPNPEP1 RECQL4 STMN1 FEN1 FAM64A DHX34 KLHDC3 EXOSC5 PPM1G ABCF1 RUVBL2 NONO TUBA1B U2AF2 ANKS6 GPR161 NRTN CHEK1 INCENP CDC25A PAK1IP1 LMNB2 NASP PPP5C MTHFD1L …	TCGA-AN-A04D-01 TCGA-BH-A42T-01 TCGA-C8-A130-01 TCGA-A7-A13D-01 TCGA-BH-A0GY-01 TCGA-A2-A3XU-01 TCGA-EW-A1P8-01 TCGA-AN-A04C-01 TCGA-A7-A6VV-01 TCGA-AO-A0J7-01 TCGA-EW-A1PD-01 TCGA-AR-A0TZ-01 TCGA-LL-A5YP-01 TCGA-A8-A06O-01 TCGA-OL-A66I-01 TCGA-EW-A6SB-01 TCGA-D8-A143-01 TCGA-C8-A12W-01 TCGA-S3-AA10-01 TCGA-A7-A4SD-01 TCGA-AC-A7VC-01 TCGA-C8-A134-01 TCGA-AR-A1AY-01 TCGA-A2-A4S3-01 TCGA-A2-A0T3-01…	(0.6581198338995552, 1.8196420733036676)	2.9023e-05	0.0115311	Basal	F	6.46e-11	32	0.16
DeBi	default	TCGA-RNAseq	1.03653	61	50	0.710323	UP	NSL1 FLVCR1 ADSS SDCCAG8 AHCTF1 TMCO1 PIP5K1A SRP9 GGPS1 FH ARID4B ANGEL2 TROVE2 CHML TIMM17A CDC73 TFB2M HNRNPU WDR26 ZNF669 PPP1R15B TIPRL DDX59 C1orf131 EPRS XPR1 IARS2 DHX9 KLHL12 INTS7 HEATR1 MTR IPO9 SMG7 ZNF124 TPR GNPAT UCHL5 ZC3H11A ARV1 LYPLAL1 POGK TAF1A FBXO28 BPNT1 LIN9 ZNF670 RBM34 TBCE RPS6KC1 YOD1 RBBP5 ACBD3 ZBTB41 TARBP1 ABCB10 NUCKS1 GATAD2B TAF5L EXOC8 RRP15	TCGA-E9-A1R7-01 TCGA-B6-A402-01 TCGA-BH-A1FJ-01 TCGA-A2-A25B-01 TCGA-AC-A8OP-01 TCGA-AO-A0JD-01 TCGA-E9-A1RC-01 TCGA-BH-A18R-01 TCGA-AR-A24K-01 TCGA-BH-A1FM-01 TCGA-BH-A1FL-01 TCGA-AO-A129-01 TCGA-A2-A0D3-01 TCGA-BH-A18S-01 TCGA-C8-A27B-01 TCGA-A7-A13E-01 TCGA-BH-A0C1-01 TCGA-A8-A095-01 TCGA-B6-A1KF-01 TCGA-B6-A409-01 TCGA-E9-A249-01 TCGA-S3-A6ZH-01 TCGA-BH-A1FN-01 TCGA-AC-A23C-01 TCGA-BH-A28Q-01…	(0.4769990174375107, 1.596058170934794)	0.000282507	0.0343186	LumB	F	0.0205	17	0.07
DeBi	default	TCGA-RNAseq	1.335	49	35	0.72165	UP	HECTD1 SMC5 ZNF253 PRPF4B ZNF254 PUM2 USP9X KIAA1033 ARHGAP5 SLC30A7 ZBTB11 TNPO1 STYX STAM2 GMFB MPP5 PAPOLA PHIP FANCM VPS13A LYSMD3 ZBTB1 ZNF681 DDX3X ZBTB6 SCYL2 DAAM1 SP3 ZNF675 CREB1 FCHO2 SEC24A ATRX NPAT CEP350 SLC35F5 SOCS4 UBE4A DICER1 SOS2 PRDM10 RAB33B ARID4A PRRC1 EXOC5 DDX6 TMTC3 LNPEP PPP2R5E	TCGA-AO-A1KS-01 TCGA-AR-A1AR-01 TCGA-A2-A0T3-01 TCGA-E2-A1LG-01 TCGA-BH-A1FM-01 TCGA-AR-A24P-01 TCGA-BH-A0BA-01 TCGA-BH-A1ET-01 TCGA-A8-A076-01 TCGA-BH-A203-01 TCGA-AR-A24S-01 TCGA-A8-A095-01 TCGA-A8-A09G-01 TCGA-A2-A25B-01 TCGA-E9-A226-01 TCGA-D8-A1J8-01 TCGA-EW-A1IY-01 TCGA-E2-A15I-01 TCGA-EW-A1J3-01 TCGA-D8-A1JA-01 TCGA-A8-A09R-01 TCGA-A8-A07F-01 TCGA-AR-A24M-01 TCGA-BH-A1FE-01 TCGA-BH-A1EU-01…	(0.7070915756618159, 1.962904227985044)	3.08501e-05	0.0115311	LumB	F	0.00487	15	0.07
DeBi	default	TCGA-RNAseq	1.20524	28	61	0.628036	UP	ZFP14 ZNF234 PRPF4B ZNF256 THOC2 C18orf25 ZNF160 ZNF585A ZNF473 ZNF347 ZNF550 ZNF551 ZNF417 MGEA5 ZNF766 ZNF761 APAF1 ZNF180 ZNF432 ZNF530 ZNF415 USP37 ZNF611 ZNF525 ZNF543 ZNF568 ZNF566 ZNF549	TCGA-AO-A1KS-01 TCGA-AR-A1AR-01 TCGA-D8-A1J9-01 TCGA-BH-A1FJ-01 TCGA-A8-A08I-01 TCGA-BH-A1EV-01 TCGA-B6-A1KC-01 TCGA-BH-A0H0-01 TCGA-AR-A24K-01 TCGA-S3-A6ZF-01 TCGA-AO-A03V-01 TCGA-AN-A0FY-01 TCGA-E9-A1RC-01 TCGA-BH-A0BA-01 TCGA-D8-A1XG-01 TCGA-AC-A2FM-01 TCGA-C8-A26W-01 TCGA-E2-A155-01 TCGA-A2-A0YG-01 TCGA-C8-A1HN-01 TCGA-D8-A1J8-01 TCGA-EW-A1PA-01 TCGA-D8-A145-01 TCGA-BH-A1FN-01 TCGA-AR-A0TZ-01…	(0.6899372392469842, 1.7205337520024464)	4.55779e-06	0.00572914	LumB	F	0.00184	23	0.1
DeBi	default	TCGA-RNAseq	1.22058	36	44	0.718177	UP	RAD23B NCBP1 RABGAP1 IKBKAP PDCL GTF3C4 CBX5 MPHOSPH9 GAPVD1 ZNF782 UBQLN1 INVS UHMK1 GOLGA1 GPR107 FBXW2 RBM18 SETX ZCCHC6 ZBTB6 KIAA0368 ALS2 RALGPS1 ZNF189 SCRN3 CORO2A RNF20 CEP350 TOR1AIP2 PREPL VPS13A ZNF484 UEVLD ZBTB43 ZBTB26 YIPF6	TCGA-AC-A23H-01 TCGA-A7-A26E-01 TCGA-B6-A0IK-01 TCGA-E2-A15S-01 TCGA-AN-A0FV-01 TCGA-AR-A24L-01 TCGA-A8-A07C-01 TCGA-A2-A0YI-01 TCGA-A8-A08L-01 TCGA-D8-A1XG-01 TCGA-B6-A0I8-01 TCGA-D8-A1XU-01 TCGA-AR-A0TZ-01 TCGA-C8-A12Z-01 TCGA-A7-A2KD-01 TCGA-E9-A22H-01 TCGA-AR-A0TR-01 TCGA-A2-A1FV-01 TCGA-AC-A23C-01 TCGA-EW-A1J1-01 TCGA-BH-A0BW-01 TCGA-A1-A0SK-01 TCGA-D8-A1X8-01 TCGA-BH-A204-01 TCGA-E2-A15R-01…	(0.5988943254328104, 1.8422716727077617)	0.000119054	0.0213787	NA	NA	1	0	0
DeBi	default	TCGA-RNAseq	1.00879	34	46	0.70443	UP	DOCK9 UFM1 TGDS RFC3 ALG5 SLC25A30 KBTBD7 CUL4A CDC16 XPO4 NDFIP2 GPR180 ARHGEF7 ABHD13 LIG4 PARP4 TM9SF2 MTMR6 MBNL2 RAP2A INTS6 DIAPH3 COG3 TPP2 OPA1 NMD3 NUFIP1 DIS3 USPL1 DNAJC3 RBM26 KPNA3 RNF6 TUBGCP3	TCGA-AO-A1KS-01 TCGA-A2-A1G1-01 TCGA-A7-A26G-01 TCGA-B6-A0IK-01 TCGA-AR-A24U-01 TCGA-C8-A275-01 TCGA-BH-A1FM-01 TCGA-BH-A0HL-01 TCGA-E2-A1B1-01 TCGA-A8-A0A6-01 TCGA-B6-A0RS-01 TCGA-AR-A0U3-01 TCGA-A8-A08G-01 TCGA-E9-A1R7-01 TCGA-S3-AA10-01 TCGA-AN-A041-01 TCGA-AR-A1AN-01 TCGA-A7-A3J0-01 TCGA-BH-A1EX-01 TCGA-D8-A27H-01 TCGA-BH-A1FN-01 TCGA-EW-A1J1-01 TCGA-A1-A0SK-01 TCGA-BH-A204-01 TCGA-EW-A1IY-01…	(0.4319591014149359, 1.5856217824784)	0.000608764	0.0466362	LumA	T	0.0041	488	0.51
DeBi	default	TCGA-RNAseq	1.04336	23	53	0.794519	UP	ZFR RAD1 RICTOR NCKAP1 XPO1 C5orf28 SKP2 FASTKD3 C5orf22 GOLPH3 NIPBL MTMR12 WDR70 TRIP13 C5orf34 NSUN2 PAIP1 TTC33 KPNA4 NUP155 MTRR TARS ZNF131	TCGA-AO-A1KS-01 TCGA-EW-A1IY-01 TCGA-A2-A0CX-01 TCGA-AR-A1AI-01 TCGA-D8-A1JJ-01 TCGA-B6-A0RE-01 TCGA-A2-A25B-01 TCGA-A2-A0EQ-01 TCGA-AR-A24U-01 TCGA-BH-A1FM-01 TCGA-E2-A158-01 TCGA-AN-A0XU-01 TCGA-D8-A1JE-01 TCGA-C8-A12Q-01 TCGA-D8-A1XA-01 TCGA-AR-A0TV-01 TCGA-EW-A1PC-01 TCGA-A7-A2KD-01 TCGA-A2-A0YE-01 TCGA-C8-A27B-01 TCGA-BH-A203-01 TCGA-AR-A0TR-01 TCGA-A2-A0YG-01 TCGA-E2-A155-01 TCGA-E9-A1RD-01…	(0.44434523309643936, 1.6423763758494352)	0.000640517	0.0466362	LumA	T	3.12e-07	492	0.52
DeBi	default	TCGA-RNAseq	1.48131	20	51	0.68687	UP	NIT2 B4GALNT1 C20orf24 RSRC1 PSMD14 LRP8 ERCC6L PSMD11 PRDX1 PSMD12 PSMA2 PFN2 PSMA1 ME1 PSMA4 PSMA5 PSMA6 PIR PSMB2 TXNRD1	TCGA-AC-A23H-01 TCGA-D8-A1JJ-01 TCGA-C8-A130-01 TCGA-A2-A25B-01 TCGA-E2-A1LK-01 TCGA-AR-A24U-01 TCGA-A2-A3XU-01 TCGA-BH-A1FM-01 TCGA-A8-A094-01 TCGA-BH-A0EE-01 TCGA-E9-A5FL-01 TCGA-OL-A5RY-01 TCGA-A8-A06Z-01 TCGA-E2-A14W-01 TCGA-A8-A06U-01 TCGA-C8-A1HN-01 TCGA-D8-A27R-01 TCGA-E9-A1NF-01 TCGA-E9-A1RH-01 TCGA-LL-A7T0-01 TCGA-BH-A1FN-01 TCGA-B6-A0IK-01 TCGA-E2-A14Y-01 TCGA-GM-A2DB-01 TCGA-BH-A0E0-01…	(0.9519088068365192, 2.010703442475152)	4.15407e-08	0.000104433	LumA	T	1e-10	496	0.53
DeBi	default	TCGA-RNAseq	1.13346	30	27	0.793807	UP	BPTF DIP2B APOOL GAB1 KRR1 SMARCA5 MPHOSPH9 STRN3 CAND1 USP46 MED13 SLC35A3 LMBRD2 MTMR4 N4BP2 INTS2 LARP4 GTF2H3 C17orf80 RNF111 ELMOD2 PRKAR1A UBR1 NUFIP2 MBTPS2 UBE2NL GSK3B TMTC3 IPO7 YIPF6	TCGA-AO-A1KS-01 TCGA-A2-A25B-01 TCGA-E2-A109-01 TCGA-BH-A0C7-01 TCGA-BH-A18R-01 TCGA-BH-A1FM-01 TCGA-AR-A24L-01 TCGA-D8-A1X9-01 TCGA-E9-A22H-01 TCGA-A2-A1FV-01 TCGA-E9-A1RH-01 TCGA-BH-A204-01 TCGA-A7-A0CG-01 TCGA-BH-A0BW-01 TCGA-E9-A1R5-01 TCGA-A8-A06N-01 TCGA-E2-A15R-01 TCGA-AQ-A0Y5-01 TCGA-A8-A07R-01 TCGA-BH-A1F8-01 TCGA-A2-A1FW-01 TCGA-BH-A1F2-01 TCGA-A8-A07P-01 TCGA-AR-A0U2-01 TCGA-B6-A0WV-01…	(0.48339895065991767, 1.7835147141221284)	0.000632128	0.0466362	LumB	F	0.000196	15	0.07
DeBi	default	TCGA-RNAseq	1.2633	18	37	0.697634	UP	ENTPD7 ANTXR1 FN1 ARSB SEC24D FBN1 SULF1 RIN2 NID2 ADAMTS12 SGMS2 GPC6 FAM26E ACVR1 SGIP1 YIPF5 SEC31A NOX4	TCGA-AO-A1KS-01 TCGA-EW-A1IY-01 TCGA-EW-A2FR-01 TCGA-AR-A250-01 TCGA-A7-A26G-01 TCGA-BH-A208-01 TCGA-BH-A1EV-01 TCGA-E9-A22E-01 TCGA-D8-A1JG-01 TCGA-C8-A12Q-01 TCGA-D8-A1XA-01 TCGA-BH-A6R9-01 TCGA-BH-A1ET-01 TCGA-D8-A27N-01 TCGA-C8-A12Z-01 TCGA-A8-A076-01 TCGA-A2-A3KD-01 TCGA-E9-A1NF-01 TCGA-A8-A09N-01 TCGA-AN-A0AS-01 TCGA-BH-A1FU-01 TCGA-E9-A226-01 TCGA-D8-A1J8-01 TCGA-BH-A1EW-01 TCGA-AO-A0JM-01…	(0.6304593410667407, 1.8961413385783241)	9.1326e-05	0.0191887	Basal	T	0.0161	170	0.18
DeBi	default	TCGA-RNAseq	1.07347	11	48	0.778587	UP	CREBZF FAM76B MRE11A CHORDC1 CEP57 ANKRD49 BIRC2 DLAT MED17 EED C11orf57	TCGA-BH-A42T-01 TCGA-D8-A1J9-01 TCGA-BH-A0BD-01 TCGA-GM-A3XL-01 TCGA-AR-A24K-01 TCGA-AN-A0XU-01 TCGA-AN-A0FY-01 TCGA-AO-A0JD-01 TCGA-BH-A18U-01 TCGA-D8-A1XG-01 TCGA-BH-A1ET-01 TCGA-B6-A0RT-01 TCGA-BH-A203-01 TCGA-C8-A1HN-01 TCGA-BH-A0DO-01 TCGA-E9-A249-01 TCGA-BH-A0HW-01 TCGA-E2-A1AZ-01 TCGA-A1-A0SK-01 TCGA-AO-A12A-01 TCGA-A8-A09V-01 TCGA-AC-A7VB-01 TCGA-D8-A1XQ-01 TCGA-E2-A1B6-01 TCGA-BH-A0B9-01…	(0.45043819634588356, 1.696499988598867)	0.000732873	0.0497957	LumA	T	0.000108	489	0.52
DeBi	default	TCGA-RNAseq	1.25299	12	37	0.777933	UP	PDXK KCTD5 EPHB4 MAGED1 EFNA4 GMPPA YKT6 KDELR2 SLC35A2 PMM2 YIPF2 SLC39A7	TCGA-BH-A18J-01 TCGA-AN-A0FL-01 TCGA-A7-A6VY-01 TCGA-A8-A094-01 TCGA-D8-A1JG-01 TCGA-C8-A12Q-01 TCGA-A2-A04W-01 TCGA-A2-A0YE-01 TCGA-B6-A0IE-01 TCGA-D8-A1JJ-01 TCGA-A2-A0T2-01 TCGA-LL-A8F5-01 TCGA-AO-A0J2-01 TCGA-B6-A409-01 TCGA-A8-A09G-01 TCGA-BH-A1EN-01 TCGA-LL-A6FP-01 TCGA-E2-A10C-01 TCGA-OL-A5S0-01 TCGA-C8-A8HP-01 TCGA-D8-A1XQ-01 TCGA-A7-A0DA-01 TCGA-LL-A6FR-01 TCGA-AC-A62X-01 TCGA-A8-A076-01…	(0.6004291734534175, 1.9055516597308535)	0.000167653	0.0275742	LumA	T	5.75e-05	493	0.52
DeBi	default	TCGA-RNAseq	1.51203	22	20	0.936781	UP	BIRC6 KIAA1033 GTF3C3 PMS1 SLC30A6 NCKAP1 STRN GCA CLIC4 RIF1 R3HDM1 CREB1 MCFD2 PTPN4 PPP1CB SOS1 KIF5B ABI1 PLEKHA1 RANBP2 YIPF4 FAM126B	TCGA-AR-A1AR-01 TCGA-BH-A1F2-01 TCGA-D8-A1JC-01 TCGA-E2-A1AZ-01 TCGA-C8-A274-01 TCGA-A7-A26G-01 TCGA-BH-A1F5-01 TCGA-D8-A27M-01 TCGA-AR-A256-01 TCGA-EW-A1IY-01 TCGA-D8-A1J8-01 TCGA-BH-A18T-01 TCGA-BH-A1F8-01 TCGA-A8-A094-01 TCGA-BH-A1FN-01 TCGA-A7-A26I-01 TCGA-D8-A147-01 TCGA-D8-A1JA-01 TCGA-BH-A0BW-01 TCGA-D8-A1JE-01	(0.7437608178074664, 2.280307486099077)	0.000114603	0.0213787	LumA	T	5.29e-06	499	0.52
DeBi	default	TCGA-RNAseq	0.919184	1018	80	0.605192	DOWN	RNF14 ZDHHC17 AGL UBL3 PRKAG1 TMCO3 CPD IL6ST HIPK1 VPS8 MFAP3 SEC23IP GLCE LEMD3 GAPVD1 ZNF709 SAMD12 ZNF703 NRIP1 ZFYVE16 MIB1 ZNF704 ZSWIM5 ZC3H13 LANCL1 SPTLC2 ZC3H14 RNF111 LMBRD2 ABCD3 VEZF1 WDR7 ARHGEF12 LARP4 ZNF41 SRFBP1 SP1 ZNF680 SP3 FAM84B SCCPDH MTUS1 PIK3C2A MON2 DHX29 IQCK PIK3C3 TRAF3IP1 ZNF766 TC2N SAMD8 EDIL3 F7 AKAP9 ZNF678 MIPOL1 RHBDD1 GOLGB1 TNKS UGCG FBXW11 TP53INP1 ACVR1B …	TCGA-D8-A1Y3-01 TCGA-E9-A22G-01 TCGA-AC-A3W5-01 TCGA-E2-A1LH-01 TCGA-A2-A3XY-01 TCGA-A2-A04U-01 TCGA-BH-A1F6-01 TCGA-LL-A441-01 TCGA-A2-A3XU-01 TCGA-A7-A6VY-01 TCGA-A2-A3XW-01 TCGA-B6-A409-01 TCGA-A7-A6VV-01 TCGA-AC-A2QJ-01 TCGA-AR-A5QQ-01 TCGA-B6-A0I1-01 TCGA-PL-A8LZ-01 TCGA-B6-A0IN-01 TCGA-B6-A0RS-01 TCGA-LL-A5YP-01 TCGA-LL-A5YM-01 TCGA-S3-AA15-01 TCGA-B6-A0RT-01 TCGA-B6-A0IJ-01 TCGA-S3-AA10-01…	(0.3921845603950245, 1.4461837458235793)	0.000629587	0.0466362	Basal	F	8.28e-25	52	0.27
DeBi	default	TCGA-RNAseq	0.958019	804	71	0.624654	DOWN	RBCK1 DDX51 CBX4 STK11 PROCA1 C16orf13 PCSK4 ARFRP1 FKBP2 FDXR PMM1 JAG2 LEMD2 SDF4 ARVCF ZNF707 MIB2 COMMD5 MRPL54 MRPL55 GRWD1 NOL3 NAPA DRAP1 ABCD1 B3GALT4 ZNF688 MAN2C1 ARHGEF16 BCAT2 CRB3 MACROD1 RAB40C OSBPL5 C19orf53 GRAP DBNL TRIOBP DDX41 FLYWCH2 D2HGDH TRAPPC5 PARP10 PHKG2 PRR12 ZGPAT GADD45GIP1 RHBDD3 ZNF777 KLC2 SPPL2B KLC4 ZNF771 PHPT1 MMP17 HSD17B14 HS1BP3 EPS8L1 TST PHLDA3 HIP1R TBC…	TCGA-AO-A1KS-01 TCGA-AR-A1AR-01 TCGA-A7-A26E-01 TCGA-D8-A1JE-01 TCGA-AR-A1AI-01 TCGA-A2-A1G1-01 TCGA-A2-A0T3-01 TCGA-D8-A147-01 TCGA-AR-A1AH-01 TCGA-E2-A1LG-01 TCGA-BH-A1FM-01 TCGA-E2-A158-01 TCGA-AN-A0XU-01 TCGA-A8-A07C-01 TCGA-BH-A1FE-01 TCGA-E2-A1B1-01 TCGA-E2-A1AZ-01 TCGA-BH-A1ET-01 TCGA-EW-A1IY-01 TCGA-BH-A1FN-01 TCGA-C8-A27B-01 TCGA-E2-A1LS-01 TCGA-BH-A209-01 TCGA-A2-A1FV-01 TCGA-A2-A1G6-01…	(0.43996345966308514, 1.4760746271221876)	0.000289542	0.0343186	Basal	F	3.95e-07	30	0.14
DeBi	default	TCGA-RNAseq	0.849307	664	67	0.630018	DOWN	DDX51 STK11 PROCA1 PCSK4 DUSP28 ARFRP1 FKBP2 FDXR SDF4 SDF2 ZNF703 SPR COMMD4 APBB3 MRPL54 ZC3H10 SRMS C3orf18 NAPA MRPL53 TMEM53 B3GALT4 ZNF688 MAN2C1 ARHGEF16 STK16 HPS6 BCAT2 IQCC IQCE TMEM184A RAB40C GATA3 OSBPL5 DBNL PRRG2 D2HGDH TRAPPC5 PARP10 PRR12 PRR13 MAG PRR15 CTBP1 SPPL2B ZNF771 PHPT1 MMP17 EVL EPS8L1 SFXN5 PRRT2 HAGHL PANK4 CHCHD5 MST1 LTC4S ANKS3 AKT1 TIMM13 ZNF513 GDF15 NR1H2 TMEM1…	TCGA-AO-A1KS-01 TCGA-AR-A1AR-01 TCGA-E2-A150-01 TCGA-AR-A1AI-01 TCGA-A2-A1G1-01 TCGA-A7-A26G-01 TCGA-BH-A1FU-01 TCGA-A2-A3XY-01 TCGA-D8-A1XW-01 TCGA-AR-A256-01 TCGA-BH-A1FM-01 TCGA-A2-A0CM-01 TCGA-E2-A1B1-01 TCGA-E2-A1AZ-01 TCGA-D8-A1JF-01 TCGA-BH-A1FC-01 TCGA-BH-A203-01 TCGA-E9-A22G-01 TCGA-BH-A0C1-01 TCGA-AQ-A04J-01 TCGA-B6-A1KF-01 TCGA-AR-A0TP-01 TCGA-E2-A1B0-01 TCGA-AO-A1KO-01 TCGA-AR-A1AY-01…	(0.36269557566594335, 1.3359192720246107)	0.000624324	0.0466362	Basal	F	2.46e-14	38	0.19
DeBi	default	TCGA-RNAseq	0.855504	408	106	0.53354	DOWN	RIC3 MFAP4 CCDC141 LHX6 PTGER4 SPN SCN4A IRAK3 BANK1 ABCD2 SIRPG ARHGEF15 GYPE POU2AF1 ARHGAP15 ANGPTL1 LAT CD226 MAL RASGRP2 CD1E CD1B CD1C ITGA7 CAPN11 CHL1 PTGDS NKG7 APOD SOX10 GRAP2 TNFRSF8 CCL21 MAP1LC3C GRM7 GDF10 DNASE1L3 PPARG COL4A3 BLK TACR1 ENPP2 GZMB GZMM GZMH KCNH8 GZMK WDFY4 ZNF423 VWF IGFBP7 CD40LG PLP1 SDPR PTX3 P2RY10 P2RY12 P2RY13 SIT1 PARVG ATOH8 LAMA2 ART4 WBSCR17 CHRDL1 SPIB…	TCGA-AC-A5EH-01 TCGA-BH-A18J-01 TCGA-AR-A250-01 TCGA-AO-A0J6-01 TCGA-D8-A1XG-01 TCGA-E2-A152-01 TCGA-C8-A1HN-01 TCGA-A2-A0T0-01 TCGA-AR-A24V-01 TCGA-BH-A1FN-01 TCGA-AN-A0XN-01 TCGA-A1-A0SK-01 TCGA-A8-A06N-01 TCGA-A2-A04U-01 TCGA-A2-A0D1-01 TCGA-D8-A1JA-01 TCGA-AN-A0XP-01 TCGA-B6-A0I1-01 TCGA-D8-A1XD-01 TCGA-E2-A15L-01 TCGA-AC-A8OR-01 TCGA-E9-A54X-01 TCGA-C8-A133-01 TCGA-D8-A1JJ-01 TCGA-A2-A25B-01…	(0.39167373089601243, 1.3193347580887296)	0.000300322	0.0343186	LumA	T	0.00104	467	0.51
DeBi	default	TCGA-RNAseq	0.925896	411	69	0.564399	DOWN	STK11 FKBP2 FKBP8 LEMD2 SDF4 ARVCF ITPKC MIB2 MRPL54 MRPL55 GRWD1 MRPL53 SCLY ARHGEF16 IFRD2 DDX49 DDX41 ZNF282 MAZ TRAPPC5 PRR12 ZGPAT GADD45GIP1 ZNF777 NTHL1 SPPL2B GTF3C5 PANK4 ANKS3 FBXL15 TIMM13 DMAP1 PSMG3 FBXL19 ZNF513 NR1H2 ING5 ANAPC2 TNK2 ZDHHC8 TP53I13 RING1 GPX4 USE1 HES4 ZNF428 LIN37 PELP1 MUS81 PRKCSH NUDT16L1 SPSB3 DCTN1 HTRA2 NDUFV1 COX5B TFPT CDC34 CDC37 RBM10 WBSCR16 SCAF1 CHTF1…	TCGA-AO-A1KS-01 TCGA-D8-A1XV-01 TCGA-AC-A2BM-01 TCGA-D8-A1JE-01 TCGA-BH-A1EX-01 TCGA-A7-A26G-01 TCGA-E9-A1NE-01 TCGA-D8-A27W-01 TCGA-D8-A1XW-01 TCGA-B6-A1KC-01 TCGA-E9-A1RB-01 TCGA-BH-A1FM-01 TCGA-AR-A24L-01 TCGA-A8-A094-01 TCGA-BH-A1FE-01 TCGA-D8-A1XA-01 TCGA-E2-A1B1-01 TCGA-A8-A09N-01 TCGA-EW-A1IY-01 TCGA-E9-A22H-01 TCGA-A2-A25C-01 TCGA-AR-A0TP-01 TCGA-E9-A1RH-01 TCGA-A2-A04Y-01 TCGA-AR-A24V-01…	(0.3966385590603583, 1.455153819150806)	0.000606237	0.0466362	LumB	F	0.0149	23	0.1
DeBi	default	TCGA-RNAseq	0.941292	409	61	0.627079	DOWN	PRKAG1 STK11 STK16 PCSK4 FDXR ZFYVE19 ZNF703 APBB3 MRPL54 ZC3H10 MRPL53 ABCD4 ZNF688 MAN2C1 ZFYVE21 CRB3 FBXO15 RAB40C GATA3 D2HGDH TRAPPC5 GADD45GIP1 PRR15 SPPL2B PHPT1 MMP17 EVL CHCHD5 FBXL15 TIMM13 GDF15 NR1H2 TMEM121 UCK1 KCNK15 TMEM129 WDR54 BRF1 FSIP1 TP53I13 SPDEF FRAT1 GPX4 SIGIRR CRIP1 C9orf116 KRT18 KLHL26 SPHK2 NUDT16L1 SPSB3 POLL HINT2 DNALI1 TM9SF1 FAM57B TCEA2 ETV2 RNF25 SLC27A1 RAB…	TCGA-BH-A0BL-01 TCGA-AR-A1AH-01 TCGA-BH-A0WA-01 TCGA-AN-A04D-01 TCGA-AR-A1AI-01 TCGA-E2-A150-01 TCGA-A7-A26G-01 TCGA-A7-A13D-01 TCGA-D8-A1XW-01 TCGA-AR-A24U-01 TCGA-C8-A275-01 TCGA-BH-A1FM-01 TCGA-EW-A1P8-01 TCGA-A8-A07C-01 TCGA-BH-A1FE-01 TCGA-A8-A07W-01 TCGA-E2-A1AZ-01 TCGA-E2-A1II-01 TCGA-C8-A27B-01 TCGA-E9-A22G-01 TCGA-AQ-A04J-01 TCGA-E2-A15A-01 TCGA-AR-A1AJ-01 TCGA-AN-A041-01 TCGA-A8-A08R-01…	(0.396473380513356, 1.4861099188004767)	0.000708515	0.049478	Basal	F	1.09e-15	38	0.2
DeBi	default	TCGA-RNAseq	1.08041	274	64	0.620244	DOWN	RNF14 HECTD2 ACADSB WWP1 GNPDA2 KRT37 LZTFL1 IKBKB CACNA2D2 SERPINA11 FBP1 LRRC46 ZNF24 MIPOL1 CLSTN2 ZNF709 PIK3C3 SAMD12 TTC30A TTC30B TRUB1 ASB8 KIAA1468 CACNA1D MIB1 ARSG NAPG ZSWIM5 DNAH5 BDP1 DNAJC12 ABCD3 MYB ELF2 SPIN3 VEZF1 WDR7 ERBB3 SPEF2 RAD50 ERBB4 ANKRD42 COG2 RAB27B CGRRF1 CSNK1G3 POLI TSPAN1 MYLIP USP30 PATZ1 MDM2 FAM120AOS PEX12 KSR2 CCDC103 SYT9 ZNF675 SOCS6 DYNLRB2 ZNF443 ALG10…	TCGA-C8-A26X-01 TCGA-B6-A0RH-01 TCGA-AC-A3W5-01 TCGA-A7-A13D-01 TCGA-A2-A04U-01 TCGA-AN-A0FL-01 TCGA-AC-A3BB-01 TCGA-EW-A1P8-01 TCGA-A2-A0CM-01 TCGA-A7-A6VV-01 TCGA-AC-A2QJ-01 TCGA-AR-A5QQ-01 TCGA-E9-A5FL-01 TCGA-PL-A8LZ-01 TCGA-AN-A0AL-01 TCGA-A2-A0YE-01 TCGA-S3-AA10-01 TCGA-E9-A1ND-01 TCGA-E2-A573-01 TCGA-C8-A26Y-01 TCGA-BH-A0BG-01 TCGA-AO-A0J2-01 TCGA-B6-A409-01 TCGA-OL-A66P-01 TCGA-AC-A7VC-01…	(0.5390868508087598, 1.621723996482592)	9.15927e-05	0.0191887	Basal	F	2.6e-17	40	0.21
DeBi	default	TCGA-RNAseq	0.973016	187	65	0.554216	DOWN	ZDHHC17 FRYL ELF2 HECTD1 LDLRAD3 RCBTB1 ZNF70 GAPVD1 ZNF709 ZNF708 ZNF383 ZNF543 CACNA1D MIB1 ZNF571 ZNF573 MAGI3 ZC3H14 PHC3 BDP1 SPIN1 ARHGEF12 ZNF43 TMF1 TRIM23 CSNK1G3 PIK3C2A GPATCH8 ATG2B KLHL9 RBM43 ZNF443 FBXL5 MPDZ TTC14 ZKSCAN3 ALG10B ARHGAP12 ZNF569 ZNF568 ZNF567 APC ZNF565 ZSCAN12 ZNF214 ZNF224 ZNF283 MYRIP ZFP14 SERINC1 ZNF222 MED1 ZFP90 ARID4A CEP290 ATP7A KLHDC1 CHD1 ZNF225 CHIC1 Z…	TCGA-A2-A0T4-01 TCGA-C8-A26X-01 TCGA-AO-A03L-01 TCGA-OL-A66P-01 TCGA-B6-A40B-01 TCGA-A2-A3XU-01 TCGA-OL-A66N-01 TCGA-AN-A0FZ-01 TCGA-A7-A6VY-01 TCGA-A2-A3XW-01 TCGA-B6-A409-01 TCGA-C8-A12Q-01 TCGA-A7-A6VV-01 TCGA-AC-A2QJ-01 TCGA-A8-A09Z-01 TCGA-A8-A08L-01 TCGA-OL-A6VO-01 TCGA-A2-A04W-01 TCGA-E9-A1RG-01 TCGA-C8-A12Z-01 TCGA-BH-A0BR-01 TCGA-OL-A5RY-01 TCGA-B6-A0IJ-01 TCGA-A8-A06U-01 TCGA-A8-A06X-01…	(0.4138810916590292, 1.5321500007773385)	0.000647812	0.0466362	Basal	F	0.000577	22	0.11
DeBi	default	TCGA-RNAseq	0.972889	210	57	0.625484	DOWN	ACADVL HSF4 UBE2J2 TSPAN10 NPEPL1 ZFPM1 ARFRP1 CHMP2A LRRC45 FDXR TMEM175 MYL5 GPS1 GNL1 ARVCF PRPF31 PLEKHH3 MIB2 GPATCH3 LRPAP1 CSNK1D SCNN1D CEMP1 DRAP1 PPP1R16A SLC26A11 SLC12A9 ZNF688 ZNF205 MAN2C1 TMUB2 SPAG7 PCYT2 CLCN7 MRPL38 TNIP2 CBX8 PEX11G SNAPC4 RFNG CTDP1 RAB40B KPTN FBXL8 ZNF446 NME3 D2HGDH PARP10 PSMC5 C17orf62 ZGPAT MAFK GAA CROCC RNF215 CTBP1 ZNF775 HIRIP3 RECQL5 FZR1 CCDC137 TY…	TCGA-AO-A1KS-01 TCGA-AR-A1AR-01 TCGA-AN-A04A-01 TCGA-A2-A1G1-01 TCGA-B6-A0IK-01 TCGA-C8-A1HL-01 TCGA-B6-A1KC-01 TCGA-E9-A1RF-01 TCGA-BH-A1FM-01 TCGA-A2-A0YF-01 TCGA-BH-A1FE-01 TCGA-E2-A1B1-01 TCGA-D8-A1JM-01 TCGA-EW-A1IY-01 TCGA-C8-A12Z-01 TCGA-E2-A14X-01 TCGA-E2-A1LS-01 TCGA-AR-A24S-01 TCGA-A2-A0YG-01 TCGA-AR-A250-01 TCGA-E9-A1RH-01 TCGA-D8-A1XU-01 TCGA-BH-A1EN-01 TCGA-AR-A1AY-01 TCGA-A7-A0CG-01…	(0.43201909608850875, 1.5137581752325455)	0.00042271	0.0425078	LumA	T	0.00258	482	0.51
DeBi	default	TCGA-RNAseq	0.937253	94	86	0.679923	DOWN	EIF3K COMMD6 EIF3F GABARAP RPL14 RPL10 RPL11 RPL12 RPL13 RPL18 EEF1G CLIC1 RPL37A RPL8 RPL6 RPL27A RPS27A RPL3 POLR1C POLR1E KLHDC3 RPL7A WDR46 UBA52 RPL41 RPL10A NACA TPT1 NUDT3 MRPL2 GLTSCR2 C6orf48 RING1 RPLP2 RPLP1 RPLP0 RPL18A RPL35A RPS15A RPS7 RPS6 RPS5 RPS3 RPS2 RPS9 CUTA EHMT2 TMEM14C RPL13A RPL4 RPS24 RPL5 RPS23 RPS20 RPS21 HNRNPA1 RXRB EEF1B2 RPS4X ZNRD1 RPSA RPS3A FBL RPS13 RPS11 RPS1…	TCGA-BH-A0W3-01 TCGA-A2-A0T3-01 TCGA-E2-A10B-01 TCGA-AQ-A04H-01 TCGA-AN-A0FZ-01 TCGA-A2-A4S2-01 TCGA-AR-A0TZ-01 TCGA-A8-A08G-01 TCGA-EW-A1P5-01 TCGA-A8-A06N-01 TCGA-E2-A15R-01 TCGA-BH-A1EX-01 TCGA-AO-A128-01 TCGA-A2-A0D4-01 TCGA-D8-A1JF-01 TCGA-GM-A2DC-01 TCGA-BH-A1EY-01 TCGA-AR-A0U2-01 TCGA-A8-A0A1-01 TCGA-BH-A0AU-01 TCGA-D8-A1JE-01 TCGA-AN-A0FV-01 TCGA-E9-A2JS-01 TCGA-C8-A3M8-01 TCGA-AR-A24L-01…	(0.4353224612919435, 1.4391827316985302)	0.000252378	0.0333936	LumB	F	0.000371	31	0.13
DeBi	default	TCGA-RNAseq	1.15539	99	47	0.656556	DOWN	ZFPM1 FDXR GPS1 PLEKHH3 LRPAP1 CSNK1D SLC26A11 A1BG ATPAF2 ZNF688 TMUB2 XYLT2 CTSF TNIP2 PALM RFNG ZNF446 KCTD17 PLD3 UBTD1 RNF215 ZNF775 SYNGR2 HSD17B14 NT5C CCDC57 B3GNTL1 FBXL15 FLYWCH2 FLYWCH1 FAM98C SLC39A13 TMEM129 CROCC IGFBP6 IGFBP4 HEXIM2 PTPN6 MPG ASPSCR1 SDSL POMGNT1 TP53I13 SIGIRR PAOX ARMC7 CHMP6 TFPT AFMID RABEP2 RAB17 MRM1 PAF1 ARL6IP4 TCEAL3 TCEAL6 NUDT18 JOSD2 SLC27A1 TAOK2 PIP5K…	TCGA-AC-A23H-01 TCGA-AR-A1AR-01 TCGA-A2-A1G1-01 TCGA-B6-A0IK-01 TCGA-BH-A1EV-01 TCGA-E2-A1LG-01 TCGA-AR-A24K-01 TCGA-C8-A138-01 TCGA-BH-A1FM-01 TCGA-A8-A07C-01 TCGA-BH-A0EE-01 TCGA-E2-A1B1-01 TCGA-E2-A1AZ-01 TCGA-C8-A12Z-01 TCGA-E2-A14X-01 TCGA-A8-A08B-01 TCGA-BH-A204-01 TCGA-E2-A14Y-01 TCGA-BH-A0E0-01 TCGA-EW-A1J1-01 TCGA-D8-A1J8-01 TCGA-EW-A1IY-01 TCGA-E9-A1N8-01 TCGA-E9-A244-01 TCGA-BH-A18V-01…	(0.5975440332907488, 1.713231602852813)	4.91962e-05	0.0154599	LumA	T	4.43e-06	492	0.52
DeBi	default	TCGA-RNAseq	1.13111	71	62	0.664239	DOWN	B3GALT4 TRIM39 RGL2 VARS SART1 TBCC RPS18 DTNBP1 FRS3 POLR1C DHX16 RING1 TEAD3 CCHCR1 ZNF76 KLHDC3 STK19 DAXX NDUFV1 EHMT2 KLF16 ABCF1 MAD1L1 SUPT5H PFDN6 MIB2 CDC37 VARS2 SKIV2L ABCC10 NFKBIL1 ALDH16A1 LENG1 AARS2 TJAP1 PACSIN3 MEA1 SYMPK MRPL14 KRI1 ZBTB12 RBM10 PAF1 ARL6IP4 SAFB MRPS18A RXRB GTF2H4 GNL1 MRPL2 GTPBP2 LMNA CCDC9 BRD2 SLC39A7 IRF3 WDR46 MTCH1 ZNF524 FKBPL LEMD2 C6orf47 SAFB2 SLC3…	TCGA-A2-A25E-01 TCGA-AC-A23H-01 TCGA-D8-A1JE-01 TCGA-AQ-A54O-01 TCGA-A2-A25B-01 TCGA-D8-A27W-01 TCGA-A2-A0CU-01 TCGA-BH-A0HX-01 TCGA-BH-A1FM-01 TCGA-AR-A24L-01 TCGA-B6-A0WV-01 TCGA-BH-A1ES-01 TCGA-AR-A24P-01 TCGA-BH-A1FE-01 TCGA-A2-A04W-01 TCGA-EW-A1IY-01 TCGA-GI-A2C8-01 TCGA-E2-A14W-01 TCGA-BH-A0C0-01 TCGA-A2-A1G1-01 TCGA-E9-A1NF-01 TCGA-EW-A1PA-01 TCGA-E9-A1RH-01 TCGA-E9-A1NA-01 TCGA-E2-A1L9-01…	(0.5979325236141876, 1.6642811014890357)	3.21073e-05	0.0115311	LumB	F	0.00267	22	0.1
DeBi	default	TCGA-RNAseq	1.16642	103	42	0.692935	DOWN	FAM3A SIVA1 ARFRP1 LRRC45 C7orf50 FKBP2 B3GAT3 PEBP1 CCDC94 NDUFB10 IRF2BP1 CCDC12 SPAG7 PCYT2 DDX49 RBM42 PTGES2 TRAPPC5 ZGPAT MRPL41 BRMS1 PAK4 MMAB UQCRC1 MRPL23 PTOV1 HRAS FDXR KLHDC4 EXOSC7 DHX37 CCDC124 RUVBL2 NT5C U2AF2 GADD45GIP1 DDX54 TIMM13 LENG1 SURF2 CCDC51 MRPL12 SIRT7 GPS1 ERP29 SART1 SLC39A3 MPG ASPSCR1 CCDC137 MRPS26 TP53I13 SAFB2 NUBP2 SSNA1 HIRIP3 ALKBH2 WBSCR22 DOHH PRKCSH TIGD…	TCGA-AR-A1AR-01 TCGA-EW-A1IY-01 TCGA-D8-A1JE-01 TCGA-AR-A1AI-01 TCGA-AR-A1AJ-01 TCGA-BH-A0C7-01 TCGA-BH-A1FM-01 TCGA-AR-A24L-01 TCGA-GI-A2C8-01 TCGA-D8-A27M-01 TCGA-E9-A22H-01 TCGA-AR-A24S-01 TCGA-S3-AA17-01 TCGA-BH-A1FN-01 TCGA-D8-A27K-01 TCGA-E9-A226-01 TCGA-AN-A0XN-01 TCGA-D8-A27T-01 TCGA-E9-A24A-01 TCGA-BH-A1EW-01 TCGA-D8-A1XY-01 TCGA-E2-A1IO-01 TCGA-A8-A09V-01 TCGA-BH-A1EO-01 TCGA-AR-A24T-01…	(0.5833756195464145, 1.749457790912221)	8.8163e-05	0.0191887	NA	NA	1	0	0
DeBi	default	TCGA-RNAseq	1.0499	83	41	0.737035	DOWN	CLEC10A RASGRP2 MYOM1 ID1 LMO2 EMCN PDE2A CCDC69 SELP LGI4 P2RX1 CLIC5 CLEC14A HAAO SH2D3C GRASP SYNPO ITIH3 KCNA5 CD79B MEOX1 ASB2 PTPRCAP GIMAP7 RASIP1 SCARA5 PLAC9 GMFG ENG GNG11 CPNE5 SOX17 ABCB1 ICAM2 SCN4A BMX C7 CLDN5 ATOH8 NPR1 ACVRL1 LYL1 ARHGEF15 DHH PPP2R2B DNASE1L3 CD27 CD40 RAMP3 THSD1 MGAT3 IL33 BLK GIMAP4 GIMAP5 GIMAP6 CTSG ANK1 HRC ADCY4 GJA4 SCARF1 SEMA3G USHBP1 ITM2A ABI3 CFD GZ…	TCGA-BH-A0DD-01 TCGA-B6-A0RE-01 TCGA-A2-A25B-01 TCGA-E2-A1LK-01 TCGA-A2-A0T0-01 TCGA-BH-A1FM-01 TCGA-E9-A1RC-01 TCGA-C8-A12Z-01 TCGA-D8-A1X9-01 TCGA-BH-A0HN-01 TCGA-A7-A13E-01 TCGA-A2-A0YJ-01 TCGA-B6-A402-01 TCGA-AR-A1AV-01 TCGA-E2-A14O-01 TCGA-E2-A10A-01 TCGA-E2-A14Y-01 TCGA-E9-A226-01 TCGA-B6-A0RI-01 TCGA-B6-A0X4-01 TCGA-AR-A0TU-01 TCGA-E2-A15J-01 TCGA-AR-A1AS-01 TCGA-E9-A1N8-01 TCGA-D8-A1J8-01…	(0.4680301733412666, 1.631762699397002)	0.000405495	0.0424756	LumA	T	0.00478	491	0.51
DeBi	default	TCGA-RNAseq	1.0071	54	60	0.643801	DOWN	SPHK2 STK19 HDAC5 HSF4 FRS3 RING1 ZNF76 LEMD2 CUTA DAXX ARVCF EHMT2 SCNN1D WDR46 SIX5 CDK10 DDX51 MIB2 ARHGEF1 NEURL2 ANKS3 SKIV2L NFKBIL1 RNF207 AARS2 LZTS2 ZBTB12 CCHCR1 CCDC12 SLC39A13 CROCC RXRB GTF2H4 E4F1 MAP1S MRPL2 GRAMD1A TJAP1 TAF1C TNK2 CCDC130 RFX1 C6orf47 CAPN10 MAP3K10 CXXC1 ZBTB45 RNF215 AATK PHF1 KLC4 ECHDC2 DDAH2 NRF1	TCGA-AC-A23H-01 TCGA-AO-A1KS-01 TCGA-C8-A278-01 TCGA-D8-A1JE-01 TCGA-A1-A0SN-01 TCGA-A2-A1G1-01 TCGA-A2-A25B-01 TCGA-BH-A0GY-01 TCGA-AN-A0FV-01 TCGA-E9-A2JS-01 TCGA-B6-A0IK-01 TCGA-BH-A1FM-01 TCGA-A8-A07C-01 TCGA-BH-A1ES-01 TCGA-AR-A24P-01 TCGA-AO-A0JD-01 TCGA-BH-A0B7-01 TCGA-D8-A1XU-01 TCGA-EW-A1IY-01 TCGA-AN-A03X-01 TCGA-E2-A155-01 TCGA-E9-A1RH-01 TCGA-BH-A1EN-01 TCGA-D8-A1JF-01 TCGA-BH-A0DZ-01…	(0.48100097027784705, 1.5332027497992573)	0.000175492	0.0275742	Her2	F	0.00129	14	0.12
DeBi	default	TCGA-RNAseq	1.41568	28	47	0.710776	DOWN	ZNF212 COPS6 POT1 MKRN1 WASL CASD1 ZNF746 BET1 ZNF3 FAM133B ARMC10 RHBDD2 WDR60 REPIN1 CUL1 LUC7L2 NDUFA5 NUB1 PMPCB PEX1 EXOC4 TMEM60 HBP1 FIS1 ZKSCAN5 GATAD1 ZNF394 DUS4L	TCGA-B6-A0IC-01 TCGA-BH-A42T-01 TCGA-OL-A66P-01 TCGA-BH-A1FU-01 TCGA-A2-A3XY-01 TCGA-BH-A1EV-01 TCGA-A2-A3XU-01 TCGA-S3-AA0Z-01 TCGA-A7-A3IZ-01 TCGA-GM-A2DI-01 TCGA-A7-A6VV-01 TCGA-AC-A2QJ-01 TCGA-EW-A1PC-01 TCGA-S3-AA15-01 TCGA-BH-A0DX-01 TCGA-A8-A06U-01 TCGA-PL-A8LZ-01 TCGA-B6-A3ZX-01 TCGA-D8-A143-01 TCGA-A7-A13G-01 TCGA-S3-AA10-01 TCGA-BH-A1FN-01 TCGA-AQ-A1H2-01 TCGA-BH-A18Q-01 TCGA-AN-A0AM-01…	(0.7848518770694393, 2.046504057814561)	1.0901e-05	0.00685129	LumA	T	0.0146	487	0.51
DeBi	default	TCGA-RNAseq	1.14328	25	46	0.73093	DOWN	COPS8 DUSP28 CHMP2A NUDT16L1 TMEM115 C1orf64 PPP1R7 ATG16L1 ANKMY1 CYB5D2 NDUFA10 MYEOV2 TRAF3IP1 SCLY RAB17 SNAPC2 ILKAP PEX11G DIS3L2 THAP4 NME3 D2HGDH DTYMK SRA1 KRT18	TCGA-AO-A1KS-01 TCGA-BH-A0BL-01 TCGA-BH-A1FH-01 TCGA-AN-A04D-01 TCGA-AR-A0TS-01 TCGA-E2-A1LK-01 TCGA-AN-A0G0-01 TCGA-BH-A1FM-01 TCGA-AO-A03V-01 TCGA-D8-A1XA-01 TCGA-BH-A1FN-01 TCGA-E2-A1II-01 TCGA-E2-A14X-01 TCGA-A7-A13E-01 TCGA-AR-A0TP-01 TCGA-AR-A1AN-01 TCGA-AR-A1AY-01 TCGA-A8-A08R-01 TCGA-GM-A2DH-01 TCGA-E2-A1AZ-01 TCGA-A1-A0SK-01 TCGA-A2-A04T-01 TCGA-D8-A1JL-01 TCGA-D8-A13Y-01 TCGA-E9-A3QA-01…	(0.5369144253810308, 1.7496499863815265)	0.000219512	0.0311425	Basal	F	8.74e-08	24	0.13
DeBi	default	TCGA-RNAseq	1.13837	24	46	0.721647	DOWN	SEC24C TSPAN15 LRRC27 HPS6 SLC29A3 RAPGEF3 POLL ECD NDST2 DNAJB12 C10orf76 CAMK2G ANXA7 HK1 AP3M1 IGFBP4 SUFU SAR1A CSF3R BTRC MRPL43 TRIM8 PPP3CB GBF1	TCGA-AC-A23H-01 TCGA-GM-A2DC-01 TCGA-LL-A8F5-01 TCGA-AC-A62Y-01 TCGA-BH-A18R-01 TCGA-BH-A1FM-01 TCGA-A8-A07C-01 TCGA-AO-A0JD-01 TCGA-AR-A5QQ-01 TCGA-A8-A08L-01 TCGA-LL-A5YM-01 TCGA-A2-A0YE-01 TCGA-OL-A5RW-01 TCGA-AN-A0XW-01 TCGA-A7-A13E-01 TCGA-A2-A0YJ-01 TCGA-A2-A0YG-01 TCGA-A2-A0T0-01 TCGA-AO-A0J2-01 TCGA-AR-A1AY-01 TCGA-B6-A0RU-01 TCGA-D8-A1J8-01 TCGA-D8-A142-01 TCGA-D8-A13Y-01 TCGA-AR-A0TU-01…	(0.4840997435235299, 1.7926461340381428)	0.000649271	0.0466362	LumA	T	4.34e-06	493	0.52
DeBi	default	TCGA-RNAseq	1.57702	27	28	0.838102	DOWN	FBXO44 SPSB3 DHRS1 TMEM115 B9D1 PEX16 CCDC106 HAGH TREX1 DEAF1 COMMD4 NDUFB10 AMDHD2 CEMP1 CCDC12 BCL7C HEXDC CPSF3L NMRAL1 SH2B1 TELO2 RAB24 NME3 TRAPPC5 NDUFS7 ALKBH7 TUFM	TCGA-AO-A1KS-01 TCGA-BH-A0BL-01 TCGA-AQ-A0Y5-01 TCGA-A7-A26G-01 TCGA-BH-A1FM-01 TCGA-C8-A12Q-01 TCGA-E9-A22G-01 TCGA-AR-A24S-01 TCGA-A2-A0YG-01 TCGA-AR-A1AR-01 TCGA-E9-A226-01 TCGA-AN-A0XN-01 TCGA-D8-A1J8-01 TCGA-D8-A1XK-01 TCGA-BH-A1EW-01 TCGA-BH-A1F2-01 TCGA-D8-A1JA-01 TCGA-AR-A24M-01 TCGA-A8-A07I-01 TCGA-D8-A147-01 TCGA-BH-A1FE-01 TCGA-A2-A25F-01 TCGA-A8-A07B-01 TCGA-A1-A0SH-01 TCGA-A8-A09A-01…	(0.8800858870448183, 2.2739610800332857)	9.20778e-06	0.00685129	LumA	T	0.023	491	0.51
DeBi	default	TCGA-RNAseq	1.17084	10	43	0.771844	DOWN	ANKRD13B FOXK2 POLDIP2 TP53I13 MED24 AATF GIT1 FLOT2 MYBBP1A ERAL1	TCGA-D8-A1JJ-01 TCGA-B6-A0IK-01 TCGA-AC-A62Y-01 TCGA-AO-A03N-01 TCGA-BH-A1FM-01 TCGA-A8-A094-01 TCGA-BH-A18P-01 TCGA-BH-A0HP-01 TCGA-BH-A0EE-01 TCGA-BH-A0BA-01 TCGA-D8-A1XT-01 TCGA-A8-A09N-01 TCGA-B6-A0RS-01 TCGA-C8-A12Z-01 TCGA-AO-A0JA-01 TCGA-A8-A076-01 TCGA-D8-A27F-01 TCGA-A7-A13G-01 TCGA-D8-A1XU-01 TCGA-BH-A1EN-01 TCGA-AC-A23C-01 TCGA-D8-A27H-01 TCGA-D8-A1J8-01 TCGA-EW-A1IY-01 TCGA-A8-A09X-01…	(0.5491885394596184, 1.7925001760881898)	0.000222977	0.0311425	Her2	F	0.045	9	0.08
DeBi	default	TCGA-RNAseq	1.27443	10	36	0.860033	DOWN	DNAJA3 RNPS1 TFAP4 TRAF7 MRPS34 TRAP1 NDUFB10 TMEM186 NTHL1 CARHSP1	TCGA-E2-A1L6-01 TCGA-A7-A26E-01 TCGA-E2-A10E-01 TCGA-EW-A1J2-01 TCGA-EW-A1IX-01 TCGA-A2-A0CU-01 TCGA-BH-A1FM-01 TCGA-C8-A12M-01 TCGA-A2-A1FZ-01 TCGA-BH-A18P-01 TCGA-EW-A1PE-01 TCGA-A2-A0T6-01 TCGA-A2-A0EW-01 TCGA-AO-A0JA-01 TCGA-BH-A0BO-01 TCGA-A2-A25C-01 TCGA-A2-A1FV-01 TCGA-A7-A0D9-01 TCGA-BH-A0W4-01 TCGA-AC-A8OS-01 TCGA-EW-A1IY-01 TCGA-D8-A1XM-01 TCGA-E2-A3DX-01 TCGA-D8-A1JA-01 TCGA-A8-A09R-01…	(0.5471360798197227, 2.001728670806412)	0.000593821	0.0466362	Basal	T	0.0218	170	0.18
DeBi	default	METABRIC	1.65953	306	13	0.588465	UP	EXO1 HRK PLK1 GPI FOXC1 P4HA2 POLR3G TPI1 AFG3L2 PKP1 SF3B5 DUSP23 IGF2BP3 KIF2C VSNL1 SMG5 TPX2 RNF26 OCIAD2 GRK6 KIAA2013 EIF3B KCNS1 DSC2 SIX2 CSNK2A2 UPP1 RTN4R ZNF574 THOC5 PITRM1 CD163L1 TAGLN2 ZFP64 VAC14 CUL1 MED15 CCDC77 CENPM HPCAL1 TCOF1 OIP5 DYSF WNK2 TTL NUP93 CENPA TEX10 C12orf49 PSMB7 IMPA2 GUK1 KLK5 PHGDH KLK8 NXN PDE8A GMPR KIFC1 CDH3 PRRG1 ZNF670 TRIP13 H2AFX HORMAD1 PTPN14 YEAT…	MB-4881 MB-0590 MB-5378 MB-3063 MB-6272 MB-5584 MB-4982 MB-5225 MB-5102 MB-0453 MB-0481 MB-0346 MB-4942	(1.0317118016704292, 2.2873564873158836)	2.20927e-07	0.000321006	NA	NA	1	0	0
DeBi	default	METABRIC	1.72288	282	11	0.625341	UP	ERRFI1 YWHAQ RYK GTF3C2 OGFRL1 TOMM40 PQLC1 MFAP2 S100A10 RAP2A SLC25A13 UGP2 B3GNT5 TPX2 NXN SLC39A14 TSPO RIOK1 PRNP DNAJB11 HPS1 UPP1 CDKN2A PLCH1 TTYH1 PRIM2 RPIA CDH3 SCLY KIF18A MYO1E CENPO FAM135A TBCCD1 TRIM29 CREB5 RNASEH1 CEP152 CENPA PAGE2B C12orf49 TNFRSF21 KCNN4 KLK5 KLK6 ACOT9 DEPDC1B TMEM100 SEMA7A BMP2 PTTG1IP PI3 ANGPT1 PRRG1 ZNF670 DR1 CRYAB ORMDL1 TCF7L1 SLC2A1 PTPN14 USP34 MIC…	MB-5465 MB-5378 MB-6272 MB-0581 MB-5102 MB-0613 MB-3470 MB-0869 MB-0149 MB-2842 MB-0314	(1.0602771012297048, 2.385487377682752)	3.46487e-07	0.000377584	Basal	F	0.00512	7	0.03
DeBi	default	METABRIC	1.35417	107	16	0.535967	UP	TSPAN19 SCFD2 TGM7 TAC4 CDX2 CECR5 SLC39A10 C11orf16 AQP6 FAM131C TDRD3 UBE2R2 KRTAP3-1 HTR7 HSD17B7P2 DBI PTPN18 HSD3B1 ZNF214 CLEC12B NOVA2 MMP19 KHDRBS2 CHD1L BACH1 USP43 OR5B2 KCNIP4 TRPM3 TECTA SGTB DSCR10 TMEM95 TMPRSS12 OR6V1 CNGA3 C12orf29 SLC26A8 HHATL MAGEB3 DNAH8 PDE6A PDZD3 FETUB C11orf65 FBXL21 ATP6V1D SCYL3 SGCB ACR LRRC37A3 MUC5B CEND1 KIAA0100 PKLR GAS2L2 GPR149 WFDC10B MGAT5B LSM…	MB-5465 MB-3266 MB-3350 MB-7147 MB-2536 MB-7100 MB-3031 MB-2954 MB-2618 MB-4671 MB-3488 MB-0901 MB-0482 MB-7013 MB-7258 MB-2790	(0.7280317752764172, 1.98030421649657)	2.24631e-05	0.0193647	NA	NA	1	0	0
DeBi	default	METABRIC	2.39006	99	11	0.557932	UP	RPN1 MAN2B1 ATP13A5 CASP14 HIBADH SLC25A13 EIF3I NT5DC2 MPP6 LAD1 PHC3 EEFSEC TRPV6 CENPN RPP40 GPI DYSF MRPS6 USP39 CTSZ RINT1 SHMT2 GMPS SHFM1 TMEM45A GTSE1 ACE2 NUP205 HSD17B12 ALG9 HR SLC7A5 ZNF593 SSU72 SLC9A5 SOX11 GMDS PPP1R14B PGK1 CISD1 EPHB6 TMEM123 VNN3 RPP25 PGM3 POLR2F PAK1IP1 RPUSD3 NCAPD3 GARS MCCC1 BSCL2 EGLN1 ABCG5 TUBB DLAT LGALS7 RBM28 NXPH4 DPF1 WBSCR22 OR7E91P FBXO6 CLCA2 SLC…	MB-4714 MB-7273 MB-0660 MB-4982 MB-0100 MB-7153 MB-5100 MB-7299 MB-4993 MB-6318 MB-0278	(1.581227316641361, 3.1988907647387634)	6.97191e-09	3.03906e-05	NA	NA	1	0	0
DeBi	default	METABRIC	1.5022	90	11	0.516427	UP	PGM2L1 PPP3R1 PPP4R1 GLG1 POLR3D S100A11 S100A12 S100A14 DHRS3 PERP LAD1 CAPN2 MARVELD3 TRPV6 PEX13 YIF1A BRD7 SLC41A2 BAK1 YEATS2 MRPL42 KPNA1 ACE2 BBOX1 DOCK5 GSK3B ECE2 FNBP1L TGFA U2AF1 SOX11 VPS37B RTN4IP1 WSB2 CLDN1 TRPM2 VNN3 SNPH ETV4 GLYATL2 SDC1 ZNF426 S100A7A RNF122 RNF121 NUTF2 HDAC2 OLFM2 TNFRSF10A PLCH1 CLCA2 CHMP7 MPZL1 DNAJB2 RPS6KB2 S100A8 TRAF3IP2 FBXW5 BCL7A AAMP HMGCS1 FRK AIM…	MB-0314 MB-5593 MB-4993 MB-4303 MB-0039 MB-3488 MB-4417 MB-0319 MB-0372 MB-0164 MB-3470	(0.8012402298583868, 2.203167127432098)	2.66548e-05	0.0193647	NA	NA	1	0	0
DeBi	default	METABRIC	1.37966	52	14	0.517308	UP	PHF14 RPS27 MED23 YTHDF3 ZMYND11 DPY19L4 ZNF16 C1D THUMPD1 SNX16 SLC39A10 SNX14 CHCHD7 GOPC MLLT4 PPT1 ZNF706 PAPOLA PHIP CLIP1 FAM110B SLC35A1 TM9SF3 VCPIP1 TMEM30A NFXL1 LRP5L ZBTB2 PCMTD1 LNX2 ARID2 SEPHS1 ATG5 RPS28 TP53INP1 SAR1A ING1 UBR5 NEBL VPS26A CAND1 SFT2D3 TCP10L CLEC4D CD164 GLUD1 ZC3H6 CUL4B ATF4 ZNF502 CDC40 TUBE1	MB-6022 MB-0120 MB-7091 MB-3436 MB-2536 MB-5575 MB-4654 MB-4767 MB-4674 MB-0163 MB-0048 MB-3046 MB-6334 MB-2954	(0.7186687912392695, 2.040656919137751)	4.29621e-05	0.0267531	NA	NA	1	0	0
DeBi	default	METABRIC	1.58056	15	10	0.544462	UP	OR52B2 FXYD4 DPF1 CCDC83 SETD5 SLC9A3R1 OSGIN1 LRFN2 TSKU H2AFJ SULT2B1 CDH1 OR10A2 BCL3 ELMO3	MB-5452 MB-0346 MB-3436 MB-0663 MB-7133 MB-0642 MB-4001 MB-5338 MB-0285 MB-5292	(0.7725737797392591, 2.3885485498818513)	0.000126064	0.0499557	NA	NA	1	0	0
DeBi	default	METABRIC	1.42192	182	16	0.543224	DOWN	SMARCC2 ZDHHC17 FRYL TM7SF2 ADD1 NDUFB8 NISCH IL6ST CCDC28B MYL5 POLR3B LRRC49 TMEM175 PLVAP LTC4S CCDC97 ZCCHC3 IDUA PCF11 ZSWIM5 ZSWIM6 ZNF573 PHC1 NAPB PTP4A2 GAK HEY1 PSMF1 ZNF688 MAN2C1 SP1 SCCPDH RAMP2 TMEM9B FLRT2 BRD8 KLHL3 ADCY4 RCOR3 ZNF446 RBM43 DNAJA4 SLTM ADCY9 SUOX PRR13 GFRA1 CTBP1 ZBTB20 SIN3A PAK1 ARHGAP19 TTC5 UGCG EVL AFAP1L2 TRAK2 NOVA1 SKAP1 CST3 FRS2 TNFRSF14 SETBP1 DCP1A C1…	MB-0581 MB-7143 MB-0590 MB-7145 MB-3063 MB-7273 MB-0660 MB-0278 MB-0664 MB-0506 MB-7299 MB-0500 MB-2618 MB-6318 MB-6010 MB-3122	(0.7222371675664099, 2.1216033827554037)	6.80202e-05	0.0370625	LumA	T	0.0417	679	0.36
DeBi	default	METABRIC	1.19486	45	13	0.52656	DOWN	HYI EEF1A2 PCCA DCLK1 SRGAP3 TAF10 NOSTRIN ABAT SEMA4B HSCB APH1B GPS2 NCOA1 BTG2 RABAC1 IDUA NBEA PIK3IP1 PIP ZBTB45 PFDN1 KIAA1324 SHC2 MPV17 TSHZ1 VILL ALDH6A1 MAN1C1 TNFRSF11B LASP1 TMEM101 TMBIM4 MRFAP1 BCAR3 TRAPPC1 SPATA6 TRIM8 GNA14 PLEKHA7 ABCC8 FUT2 RNF215 SPG11 PARK7 KRT18	MB-5518 MB-5632 MB-3063 MB-4651 MB-5427 MB-5299 MB-2618 MB-0062 MB-0120 MB-5338 MB-4696 MB-4767 MB-4417	(0.5949626111750821, 1.7947491706246101)	9.46868e-05	0.04586	NA	NA	1	0	0
DeBi	default	METABRIC	2.31216	49	11	0.517128	DOWN	CDH12 KIAA0040 MYRIP WWP1 C1orf21 ERGIC1 PIH1D2 SERPINA11 NOSTRIN FAAH2 ATP2C2 XBP1 TBC1D9 GLDN ZHX2 RGS5 ZNF417 ARHGAP29 GREM2 NR3C2 FAM102A ZMYND8 FRZB RALGPS1 CMBL LDB2 COX4I2 SGSM2 ABLIM3 GRAMD1C CYP4X1 GPATCH2 PDCD4 SRPK2 RAB27B SLC40A1 LRIG1 AZGP1 PCP2 TTC14 KIF13B GFRA1 PTPRB ALKBH8 COQ7 PCDH19 CRIP1 ANKRA2 FUT8	MB-3277 MB-7084 MB-7025 MB-0346 MB-3063 MB-3031 MB-4986 MB-7194 MB-0241 MB-7007 MB-6336	(1.4949093505009916, 3.129401948871193)	2.93726e-08	6.40176e-05	NA	NA	1	0	0
DeBi	default	METABRIC	1.58741	27	12	0.532713	DOWN	CBLN3 UBE2L3 ADAM30 SERPINA3 CGN ASXL1 PLEKHH2 C6orf141 SOBP TBC1D25 HMG20A DNAJC18 EPHB3 NPR2 TRAF5 KATNAL1 ABHD8 IGFBP4 AP2A2 SMAD3 VAT1 RNASE13 PLCD4 CAPN11 PLEKHA4 ATHL1 MME	MB-0584 MB-0660 MB-0663 MB-7153 MB-0506 MB-5441 MB-4671 MB-7288 MB-0895 MB-4696 MB-7007 MB-0035	(0.7771260677785468, 2.3976941171549533)	0.000123173	0.0499557	NA	NA	1	0	0
DeBi	optimized	TCGA-micro	1.70396	848	21	0.558281	UP	HIST1H4C TAP1 FGFR1OP2 RYK MFGE8 ZCCHC14 PSPC1 FTMT HIST1H4L ANP32E ANP32B RARS2 GPM6B FBXO32 SF3B3 LEMD1 ADD2 LHX2 CD8B SUPT5H SLC28A1 PCBP4 NOB1 PPRC1 UCHL3 PRIM2 C3orf17 IRX1 PCDH11Y NPR3 LARP7 CAMKV SFRP1 IQCG OCA2 OSBPL3 CXCL16 C19orf57 CLEC2L PRRG3 GTSE1 DDX47 PPP1R14C FLJ13224 PHKG1 CEP72 CSN3 CSRP2 STK38L RASGRP3 ENOX2 DIRAS1 ELAVL2 BBOX1 RRP1B VGLL1 LSM14A C1QL2 ITGA6 ASNS SLCO5A1 POLR1E…	TCGA-A2-A04T-01 TCGA-A2-A0YE-01 TCGA-BH-A0BG-01 TCGA-AN-A04D-01 TCGA-A7-A13E-01 TCGA-A2-A0T2-01 TCGA-A2-A0ST-01 TCGA-A1-A0SP-01 TCGA-A1-A0SO-01 TCGA-A2-A04P-01 TCGA-B6-A0I6-01 TCGA-E2-A14N-01 TCGA-AN-A0FX-01 TCGA-E2-A1B5-01 TCGA-A2-A0CM-01 TCGA-BH-A18G-01 TCGA-A2-A04Q-01 TCGA-AO-A124-01 TCGA-BH-A18V-01 TCGA-A1-A0SK-01 TCGA-BH-A18Q-01	(0.9411074151596781, 2.466806191911582)	1.19817e-05	0.0260243	Basal	F	3.33e-12	19	0.11
DeBi	optimized	TCGA-micro	1.92213	411	11	0.639078	UP	MLLT10 RYK NCBP2 IQCB1 ANP32E ANP32B L1CAM DLG1 SLC43A3 PLCH1 FSCN1 C3orf17 DHX9 TCOF1 ZMYM5 IQCG IFRD1 DDX49 C19orf52 AKAP8 POP1 CEP72 YBX1 HSD17B12 RASL10B RAB6A GTF3C2 POLR1E FAM64A GABBR2 PANK1 CHCHD3 XPO4 WDR46 TTK INGX TTL SLC37A3 XPOT TMEM123 CCDC58 C8orf46 UCK2 SENP3 ATF1 BLM UBE2E3 GDI2 NUFIP1 PDAP1 TFAP4 ATAD2 KRT16 SERBP1 EIF4A1 POLQ OTUD4 SMAD2 SMO MKRN2 FOXM1 CDC123 RGMA SMC2 SMC4 PY…	TCGA-BH-A18V-01 TCGA-AN-A0FJ-01 TCGA-AN-A03Y-01 TCGA-AR-A0TU-01 TCGA-BH-A18R-01 TCGA-E2-A14N-01 TCGA-A8-A09Q-01 TCGA-BH-A18K-01 TCGA-A2-A0CM-01 TCGA-A2-A0D0-01 TCGA-A1-A0SK-01	(0.9911583083846692, 2.8531064255076757)	5.19596e-05	0.0376188	Basal	F	0.00895	6	0.03
DeBi	optimized	TCGA-micro	1.93603	397	11	0.68016	UP	RYK CENPL IQCB1 PSPC1 TOMM40 ANP32B UBAC1 LANCL2 RMND5A PLCH1 PRIM2 C3orf17 DHX9 WDR5 NUP93 WHSC1 GTSE1 ANP32E CEP70 STARD6 ELAVL2 QSOX2 GTF3C2 FAM64A ARHGAP11A CHCHD6 TTK ZIC4 INGX GDF11 UCK2 NCAPD2 NCAPD3 BLM ANAPC1 GART ANAPC5 ANAPC7 TUBGCP3 SFT2D3 RRP12 EIF4A1 POLQ TMEM81 POLG POLE FOXM1 CDC7 SMC2 SMC4 RAD51AP1 NUS1 ART3 GSG2 RXRB SS18 SRPK1 YAP1 APBA2 GEMIN4 TBP CDK5RAP1 PCID2 ARHGEF11 HMGB2…	TCGA-BH-A18V-01 TCGA-D8-A143-01 TCGA-A1-A0SO-01 TCGA-AR-A0TU-01 TCGA-A8-A07L-01 TCGA-BH-A18R-01 TCGA-A2-A0CM-01 TCGA-AN-A0AK-01 TCGA-A2-A0D0-01 TCGA-A1-A0SK-01 TCGA-BH-A18Q-01	(0.9986022394446412, 2.8734622685051088)	5.16956e-05	0.0376188	Basal	F	0.00126	7	0.04
DeBi	optimized	TCGA-RNAseq	1.12431	45	36	0.994361	UP	HSF1 RECQL4 RPL8 ZNF251 COPS5 MAPK15 PUF60 FAM83H TIGD5 ZNF16 CPSF1 MRPL15 ZNF7 TSNARE1 SLC39A4 VPS28 ADCK5 ZNF707 COMMD5 ZFP41 ZNF517 PTP4A3 ENY2 PPP1R16A GRINA GLI4 RRS1 MFSD3 TOP1MT BOP1 KIFC2 ZNF34 RHPN1 PYCRL MED30 MAF1 ZC3H3 CYC1 TBCB PARP10 FBXL6 SCRIB GPAA1 LRRC14 SHARPIN	TCGA-B6-A402-01 TCGA-LL-A7T0-01 TCGA-E2-A1LK-01 TCGA-OL-A5D8-01 TCGA-E9-A5UP-01 TCGA-A2-A3XU-01 TCGA-AO-A0JL-01 TCGA-A8-A07W-01 TCGA-A7-A6VY-01 TCGA-AC-A2QJ-01 TCGA-BH-A0H6-01 TCGA-AC-A2FM-01 TCGA-LL-A5YP-01 TCGA-A8-A06O-01 TCGA-B6-A0IJ-01 TCGA-A7-A0D9-01 TCGA-JL-A3YX-01 TCGA-A1-A0SK-01 TCGA-E9-A54Y-01 TCGA-EW-A1P6-01 TCGA-A2-A3XX-01 TCGA-A2-A0D4-01 TCGA-AN-A0FX-01 TCGA-A2-A0YT-01 TCGA-GM-A2DC-01…	(0.4725247575281857, 1.7760909843310884)	0.000722531	0.0468009	Basal	F	0.00566	12	0.06
DeBi	optimized	TCGA-RNAseq	1.43487	47	31	0.861524	UP	DMRT1 HMGN1 RRP1 SUMO3 ATP5J ATP5O ECE2 MRPL14 ICOSLG KLHDC3 VARS ABCF1 BCL2L12 U2AF1 FZD9 ADCK5 LEMD2 RPP21 PFKL UBE2G2 ENY2 LYPLA2 WDR4 TCOF1 PRMT2 MRPS6 MRPS5 GTF2H4 CSTB ENO1 MRPL2 EBNA1BP2 PWP2 HMGA1 TSPO C21orf33 PTTG1IP DAZAP1 WDR46 RALY COMTD1 C1orf35 TUBA1C GPAA1 PPIH PSMB2 SLC19A1	TCGA-UL-AAZ6-01 TCGA-B6-A402-01 TCGA-LL-A7T0-01 TCGA-A2-A0EQ-01 TCGA-A2-A3XU-01 TCGA-EW-A1P8-01 TCGA-A7-A6VV-01 TCGA-AC-A2QJ-01 TCGA-OL-A5RW-01 TCGA-A2-A0T2-01 TCGA-LL-A8F5-01 TCGA-AO-A0J2-01 TCGA-B6-A409-01 TCGA-LL-A5YO-01 TCGA-A2-A3XV-01 TCGA-OL-A5S0-01 TCGA-A2-A0YM-01 TCGA-A7-A6VW-01 TCGA-A2-A3XX-01 TCGA-A8-A07R-01 TCGA-C8-A12P-01 TCGA-AC-A62X-01 TCGA-OL-A5D7-01 TCGA-B6-A0I1-01 TCGA-LD-A7W5-01…	(0.7097521032800664, 2.1599807723209308)	0.000105144	0.0231166	Basal	F	3.73e-07	17	0.09
DeBi	optimized	TCGA-RNAseq	1.26815	21	27	0.99307	UP	LMNB2 INCENP DPH2 SF3B2 FEN1 MRPL11 SSRP1 KIF2C KTI12 CDC20 RAD54L MCM5 FOXM1 MCM2 CDCA5 CHAF1A TTC9C RFC2 PPP1R14B POLA2 MTA2	TCGA-D8-A1Y3-01 TCGA-GM-A3XL-01 TCGA-A7-A6VY-01 TCGA-AR-A5QQ-01 TCGA-C8-A12K-01 TCGA-E2-A1L7-01 TCGA-AN-A0AL-01 TCGA-D8-A27F-01 TCGA-HN-A2NL-01 TCGA-B6-A0IG-01 TCGA-E9-A1RB-01 TCGA-A1-A0SK-01 TCGA-D8-A13Y-01 TCGA-E9-A3QA-01 TCGA-AR-A0TU-01 TCGA-A7-A6VW-01 TCGA-A2-A0D4-01 TCGA-BH-A18U-01 TCGA-Z7-A8R6-01 TCGA-OL-A5D7-01 TCGA-AC-A62V-01 TCGA-B6-A0I6-01 TCGA-E9-A22G-01 TCGA-EW-A1P8-01 TCGA-A2-A3XT-01…	(0.5468173892448636, 1.9894785856525818)	0.000569478	0.0435503	Basal	F	2.35e-06	15	0.08
DeBi	optimized	TCGA-RNAseq	1.77014	24	18	0.993608	UP	TGM1 ACTA1 ACTG2 CRYAB JPH2 LEMD1 CCKBR KCNK5 TMCC2 EN1 SHC4 ART3 KLHL30 COL9A3 FBN3 TSPAN2 FOXL1 ACTN1 PLEKHG1 ACTN4 MICALL1 KRT81 FLNA MSLN	TCGA-D8-A142-01 TCGA-BH-A0BL-01 TCGA-E9-A1NC-01 TCGA-D8-A27F-01 TCGA-A2-A0YJ-01 TCGA-A7-A0DA-01 TCGA-AO-A0J4-01 TCGA-A2-A3XX-01 TCGA-B6-A409-01 TCGA-B6-A0RM-01 TCGA-D8-A27H-01 TCGA-B6-A0WX-01 TCGA-A8-A08R-01 TCGA-A7-A4SE-01 TCGA-EW-A1P7-01 TCGA-A7-A56D-01 TCGA-B6-A400-01 TCGA-A2-A3XY-01	(0.7539646314725605, 2.786320978000618)	0.000639741	0.0447528	Basal	F	1.2e-07	13	0.07
DeBi	optimized	TCGA-RNAseq	1.57816	23	14	1.22859	UP	RRP1 RRP9 LRFN4 FAM58A CC2D1B DGKZ ABCF2 CARD9 PSMC3 PPP1R14B ESRRA CSTB POLR2F MRPL2 RPUSD1 TRIM47 TSPO EBNA1BP2 B4GALT2 KTI12 CDC20 MAP3K11 WDR74	TCGA-E9-A3QA-01 TCGA-EW-A6SB-01 TCGA-GM-A3XL-01 TCGA-AO-A1KR-01 TCGA-A7-A6VW-01 TCGA-EW-A1P8-01 TCGA-A2-A3XU-01 TCGA-GM-A2DF-01 TCGA-A2-A3XT-01 TCGA-A7-A6VY-01 TCGA-B6-A0I2-01 TCGA-B6-A409-01 TCGA-AC-A2QJ-01 TCGA-AC-A62V-01	(0.6625188248045848, 2.4937912655566237)	0.000729838	0.0468009	Basal	F	2.77e-09	12	0.07
DeBi	optimized	TCGA-RNAseq	1.77873	15	15	1.14061	UP	FHOD1 PNLIPRP3 KYNU CSPG5 ZP1 POR AKR1D1 TKT GGT1 HAAO LBP SLC26A6 ARPC1B TRPV6 C15orf43	TCGA-EW-A6SD-01 TCGA-OL-A5D6-01 TCGA-LL-A740-01 TCGA-AO-A0J2-01 TCGA-OL-A66P-01 TCGA-D8-A1JF-01 TCGA-A2-A3Y0-01 TCGA-JL-A3YW-01 TCGA-LL-A73Z-01 TCGA-AC-A2QJ-01 TCGA-A2-A0SV-01 TCGA-UU-A93S-01 TCGA-GM-A2DD-01 TCGA-C8-A26X-01 TCGA-A2-A3XV-01	(0.8688785263864388, 2.688579682519698)	0.000127278	0.0240201	Her2	F	0.00132	7	0.08
DeBi	optimized	TCGA-RNAseq	0.99149	460	72	0.725048	DOWN	UBL3 PRKAG1 PCSK4 DUSP28 MOCS1 SQRDL ZNF703 CEACAM5 ABCD4 ARHGEF15 XPC XPA RPGRIP1 ABLIM3 FBXO15 GATA2 GATA3 ZNF671 SNAP23 SNAP29 PARP11 PRR13 PRR15 ACVR1B NOVA1 MGST2 TPK1 KCNMA1 GDF15 HNMT RPH3AL THSD4 KCNK15 SLC39A9 FSIP1 KCNH1 CSNK1A1 SPDEF SLC22A5 FBXO36 SIGIRR EFCAB6 CRIP1 ANKRA2 KRT18 NPDC1 TLE3 RORC RHOB POLN SLC4A8 AKR7A3 CCNDBP1 NEDD4 DNALI1 TM9SF1 CISH ENPP1 LONRF2 NAT1 SLC27A2 CMBL TP…	TCGA-BH-A0BL-01 TCGA-BH-A0WA-01 TCGA-AN-A04D-01 TCGA-B6-A402-01 TCGA-B6-A0RE-01 TCGA-A7-A13D-01 TCGA-A2-A3XY-01 TCGA-A2-A04U-01 TCGA-EW-A1PH-01 TCGA-A2-A3XU-01 TCGA-AO-A0JL-01 TCGA-E2-A158-01 TCGA-AN-A0XU-01 TCGA-A2-A0CM-01 TCGA-B6-A409-01 TCGA-AO-A0J6-01 TCGA-E2-A1AZ-01 TCGA-PL-A8LZ-01 TCGA-D8-A1JM-01 TCGA-E2-A1II-01 TCGA-A2-A0YE-01 TCGA-BH-A18T-01 TCGA-A7-A13E-01 TCGA-S3-AA0Z-01 TCGA-BH-A6R9-01…	(0.46047541434447214, 1.522505492601831)	0.000252641	0.0353468	Basal	F	6.56e-43	59	0.34
DeBi	optimized	TCGA-RNAseq	1.53225	240	31	0.800367	DOWN	TRIM11 TOMM40 CHTF18 UBE2J2 HSPA1A FAM3A STK11 SIVA1 ARFRP1 LRRC45 REXO4 FKBP2 B3GAT3 LEMD2 NOSIP SDF4 C19orf48 SUPT5H PRPF31 DRAP1 EIF3G MRPL55 GRWD1 DVL1 ZNF787 NDUFA13 PPP1R16A SLC12A9 ZNF282 PNPLA6 ZNF205 TMUB1 NFKBIL1 PNKP POR SAFB TSC22D4 TNIP2 MOSPD3 GUK1 MACROD1 GIPC1 DOHH GPATCH3 DDX49 RBM42 SURF2 MAF1 ARPC1A C1orf35 PQBP1 ZGPAT GADD45GIP1 POP7 ARPC1B ZNF777 NTHL1 ZNF775 EEF1D C7orf50 RR…	TCGA-B6-A0IC-01 TCGA-D8-A1JE-01 TCGA-A2-A1G1-01 TCGA-A7-A26G-01 TCGA-BH-A1FM-01 TCGA-AR-A252-01 TCGA-EW-A1IY-01 TCGA-A2-A1FW-01 TCGA-A7-A13G-01 TCGA-BH-A1FN-01 TCGA-D8-A1J8-01 TCGA-E9-A243-01 TCGA-A8-A09W-01 TCGA-D8-A1XM-01 TCGA-E9-A24A-01 TCGA-E2-A1L8-01 TCGA-C8-A1HM-01 TCGA-EW-A1J3-01 TCGA-D8-A1JA-01 TCGA-E2-A15M-01 TCGA-BH-A1F8-01 TCGA-D8-A1JU-01 TCGA-E9-A1R3-01 TCGA-BH-A1FE-01 TCGA-BH-A1EU-01…	(0.8071173836155996, 2.257382580075876)	3.45004e-05	0.0106192	NA	NA	1	0	0
DeBi	optimized	TCGA-RNAseq	1.5111	173	29	0.856554	DOWN	ZDHHC17 FRYL ACADSB IL6ST TNRC6C ZNF24 CCNT2 ZNF709 TTC30A TTC30B ZFYVE16 FAM46C PCF11 ZNF571 CRBN MAGI1 ZNF664 ZFP62 SPIN3 WDR7 RASEF ERBB4 SCAMP1 CLCN3 SP1 FAM84B CNOT6L TRIM23 USP38 POLI MDM1 MDM2 IQCH STRBP SOCS6 ZNF443 ZNF678 CTR9 RNF103 RHBDD1 ZNF566 ADNP MYRIP PCM1 ZFP14 SERINC1 FRS2 RC3H1 ARID4A BAZ2B CEP290 CLASP2 CHD1 KBTBD4 CCDC121 CHD6 PRLR PLA2G12A MKL2 RAPH1 VEZF1 FBXL17 TRAF3IP1 RI…	TCGA-OL-A66P-01 TCGA-A7-A13D-01 TCGA-A2-A3XU-01 TCGA-EW-A1P8-01 TCGA-A2-A3XW-01 TCGA-A7-A5ZV-01 TCGA-A7-A6VV-01 TCGA-AC-A2QJ-01 TCGA-AR-A5QQ-01 TCGA-E9-A5FL-01 TCGA-AN-A0AL-01 TCGA-AO-A0J2-01 TCGA-B6-A409-01 TCGA-AC-A7VC-01 TCGA-A8-A08R-01 TCGA-JL-A3YW-01 TCGA-LL-A6FR-01 TCGA-A7-A56D-01 TCGA-LL-A5YO-01 TCGA-OL-A5S0-01 TCGA-AC-A2QH-01 TCGA-E2-A1LL-01 TCGA-E2-A574-01 TCGA-A2-A0D0-01 TCGA-A2-A3Y0-01…	(0.6813703844346513, 2.3408231167427873)	0.000357685	0.0435503	Basal	F	3.95e-10	20	0.11
DeBi	optimized	TCGA-RNAseq	1.46334	214	23	0.900717	DOWN	ZDHHC17 FRYL DNAL1 CPD FCHO2 IL6ST CHN2 HIPK1 HECTD1 TNRC6C RCBTB1 SYNE1 ZNF70 MFAP3 SULT1C4 CACNA2D1 SMG1 TTC30A TTC30B INPP4B RORA TMEM87B FAM114A1 ZNF571 ZC3H13 SPTLC2 MYCBP2 RNF111 WDR7 C5orf15 ENTPD5 TEP1 CTSO RFFL CHM TRIM23 PIK3C2A MON2 UBR1 ATG2B RBM43 SNAP23 KIF27 FBXL5 RAPGEF6 TTC14 ZNF79 ARHGAP12 TCF12 IBTK APC UBL3 ZNF641 SEL1L TSPYL4 STARD13 ZNF224 ZFP14 SERINC1 SERINC3 AKAP9 MANEA A…	TCGA-D8-A1Y3-01 TCGA-A2-A04U-01 TCGA-A2-A3XU-01 TCGA-A2-A3XW-01 TCGA-AC-A2QJ-01 TCGA-E9-A22G-01 TCGA-AO-A03R-01 TCGA-B6-A409-01 TCGA-LL-A6FR-01 TCGA-E2-A14Y-01 TCGA-E9-A54Y-01 TCGA-AR-A0TU-01 TCGA-A7-A6VW-01 TCGA-AO-A1KR-01 TCGA-BH-A0E6-01 TCGA-AQ-A54N-01 TCGA-AC-A62V-01 TCGA-BH-A18T-01 TCGA-A8-A07O-01 TCGA-AN-A0FJ-01 TCGA-A2-A3Y0-01 TCGA-UU-A93S-01 TCGA-A2-A0D0-01	(0.6281894373482422, 2.2984900681681166)	0.000594253	0.0435503	Basal	F	2.79e-07	14	0.08
DeBi	optimized	TCGA-RNAseq	1.27641	98	24	0.890083	DOWN	HSF1 NDUFB7 PES1 PUF60 LRRC45 FKBP2 FKBP8 NOSIP SDF4 FAM50A TSNARE1 SUPT5H PRPF31 ZNF707 MIB2 COMMD5 ZNF787 NDUFA13 PPP1R16A RPL13 DDX49 RBM42 MAF1 EEF1D ZNF524 ZGPAT GADD45GIP1 BRMS1 PTGES2 DRAP1 ZNF775 RECQL4 RPL8 RRP9 DHX38 DAPK3 EXOSC4 CCDC124 RUVBL2 TRABD DGCR6L SDF2L1 SURF2 SURF6 MRPL12 POLR2F SART1 CCDC9 PDAP1 ZC3H3 FBXO31 RRP1 DOHH TIGD5 EIF3G RPS9 ZBTB17 TMED1 TFPT CDC37 RBM10 PPP1R12C T…	TCGA-BH-A1FH-01 TCGA-D8-A1JE-01 TCGA-AR-A250-01 TCGA-BH-A1FM-01 TCGA-E2-A1IL-01 TCGA-A2-A0YF-01 TCGA-BH-A1ET-01 TCGA-AN-A0XV-01 TCGA-BH-A203-01 TCGA-E9-A1RD-01 TCGA-E9-A1NH-01 TCGA-E9-A226-01 TCGA-D8-A1J8-01 TCGA-EW-A1IY-01 TCGA-E9-A24A-01 TCGA-EW-A1J3-01 TCGA-D8-A1JA-01 TCGA-BH-A1F8-01 TCGA-AR-A252-01 TCGA-BH-A1EU-01 TCGA-AC-A2B8-01 TCGA-A1-A0SO-01 TCGA-AR-A0U2-01 TCGA-C8-A27A-01	(0.5559431552784718, 1.9968695496280215)	0.000515896	0.0435503	NA	NA	1	0	0
DeBi	optimized	TCGA-RNAseq	1.20467	63	29	0.831082	DOWN	SBNO1 DDI2 ZRANB3 KIAA1468 SMAD4 ZNF236 RASSF3 SIRT1 SMAD2 GLUD2 ADAM10 OSBPL1A RAB11FIP2 DENND4A DCP1A MANEA EPC1 NARS CWF19L2 NUP153 SETD2 C18orf25 PUM2 HDHD2 MIB1 C5orf24 SON DPP8 DYM PHIP CUL5 ZFP14 SIN3A WDR7 ZNF184 ASH1L DPY19L3 NUP98 KIAA1328 SENP6 ZNF407 KIDINS220 ZNF24 IBTK LMAN1 PPP4R2 VPS4B ZCCHC2 ZDHHC21 PIK3C3 HIPK3 DDX21 SOCS6 ZNF619 EPC2 ROCK1 PPTC7 PIAS2 ADNP2 PARD3B PBRM1 ZNF567 …	TCGA-EW-A423-01 TCGA-OL-A5D6-01 TCGA-AC-A3W5-01 TCGA-A2-A3XU-01 TCGA-E2-A1LE-01 TCGA-E2-A10C-01 TCGA-AC-A2QJ-01 TCGA-E9-A5FL-01 TCGA-E2-A2P6-01 TCGA-A8-A06U-01 TCGA-LL-A8F5-01 TCGA-AO-A0J2-01 TCGA-A7-A5ZV-01 TCGA-JL-A3YW-01 TCGA-E9-A54Y-01 TCGA-AQ-A54O-01 TCGA-LL-A5YM-01 TCGA-E9-A1RG-01 TCGA-PE-A5DC-01 TCGA-AC-A62V-01 TCGA-LL-A6FQ-01 TCGA-LL-A5YL-01 TCGA-A2-A04P-01 TCGA-3C-AALI-01 TCGA-A2-A3XT-01…	(0.5238388377907357, 1.8855072197155762)	0.000524397	0.0435503	LumA	T	0.0388	492	0.51
DeBi	optimized	TCGA-RNAseq	1.72864	53	26	0.906313	DOWN	FOXA1 UBL3 AGR2 ZNF253 NBEA SIDT1 KCNJ11 CPEB3 ABAT ARID4A XBP1 SORL1 KIAA1324L ZNF709 STRN3 PPM1A PRLR ZNF160 INPP4B RAB19 COL4A3BP C2orf15 SPTLC2 RASEF ZNF552 ZNF107 ZFP14 CNOT4 ARHGEF12 SLC44A4 RNF103 ERBB4 FNIP1 ZNF680 ZNF675 CCDC125 GALNT7 TMEM87B ZMYND8 RAB27B EXOC6 SPDEF CAPN13 ERMP1 ZNF138 CTR9 ZNF91 ZNF92 PRR15 MYO5C GPD1L SPG11 ZNF429	TCGA-BH-A42T-01 TCGA-E2-A1LK-01 TCGA-A2-A04U-01 TCGA-E9-A5UP-01 TCGA-A2-A3XU-01 TCGA-S3-AA0Z-01 TCGA-AC-A2QJ-01 TCGA-AO-A0J6-01 TCGA-OL-A5RY-01 TCGA-EW-A6SB-01 TCGA-LL-A8F5-01 TCGA-B6-A409-01 TCGA-AC-A7VC-01 TCGA-A2-A3XY-01 TCGA-OL-A5S0-01 TCGA-EW-A1P4-01 TCGA-A2-A0YM-01 TCGA-A2-A3XX-01 TCGA-AC-A2QH-01 TCGA-A2-A4RX-01 TCGA-B6-A400-01 TCGA-B6-A0I1-01 TCGA-AC-A6IW-01 TCGA-A8-A07O-01 TCGA-BH-A0AV-01…	(1.0001916018648553, 2.4570836312114532)	3.30186e-06	0.00243169	Basal	F	9.53e-12	18	0.1
DeBi	optimized	TCGA-RNAseq	1.64468	68	19	0.907962	DOWN	TRIM11 SPHK2 ACADVL CUEDC2 SAC3D1 NFKBIB PMVK RPS19 BAX PELP1 AKT2 TOMM40 PIN1 ARHGEF1 BBC3 SLC25A11 DVL2 STRN4 BRF1 ZBTB17 KLF16 TAF6L ZGPAT GRK6 SUPT5H PRPF31 FAU CNTROB RPS9 IRF2BP1 LIG1 RRP9 SURF2 ADRM1 OGFR USF2 CENPT TOP1MT CCHCR1 PKN1 RBM10 DRAP1 TSC22D4 GLTSCR2 GUK1 SGSM2 NUDT14 TELO2 SART1 CCDC9 PFKL IRF3 RBM42 BTBD6 RPS6KA4 ZNF524 PPP1R12C EEF1D MYBBP1A C1orf35 NDUFV1 STX10 SPATA2L ZNF6…	TCGA-AO-A1KS-01 TCGA-AR-A1AR-01 TCGA-A8-A08G-01 TCGA-E2-A1LS-01 TCGA-D8-A1JT-01 TCGA-E9-A1R7-01 TCGA-D8-A1X7-01 TCGA-C8-A278-01 TCGA-D8-A1JA-01 TCGA-E2-A1BC-01 TCGA-BH-A1FM-01 TCGA-AR-A24L-01 TCGA-D8-A1JE-01 TCGA-AN-A0XP-01 TCGA-AC-A23C-01 TCGA-E9-A1RI-01 TCGA-E9-A226-01 TCGA-D8-A1J8-01 TCGA-BH-A1F2-01	(0.7270196357864624, 2.5623375687580614)	0.000443487	0.0435503	LumB	F	0.00647	10	0.05
DeBi	optimized	TCGA-RNAseq	1.70571	47	27	0.939025	DOWN	MYRIP ZFP14 TFF1 TFF3 FBP1 FA2H FAAH2 KIAA1324 TMEM116 XBP1 FOXA1 ZNF709 PRLR AFF3 RAB19 C2orf15 ZNF552 PHOSPHO2 RABEP1 PRR15 KCNJ11 SLC44A4 TOM1L1 RALGPS1 ZNF24 CASC1 ANKS1B PATZ1 DUSP16 CRNKL1 ABCG1 MYB EXOC6 TMEM62 ZNF443 SPDEF MCF2L ZNF138 PLEKHA6 RNF103 GKAP1 MYO5C GPD1L ZSCAN16 DDAH1 ZNF396 ZNF429	TCGA-A7-A13D-01 TCGA-A2-A3XY-01 TCGA-A2-A3XU-01 TCGA-A2-A0CM-01 TCGA-A7-A5ZV-01 TCGA-A7-A6VV-01 TCGA-AC-A2QJ-01 TCGA-AR-A5QQ-01 TCGA-E9-A5FL-01 TCGA-A2-A0T0-01 TCGA-B6-A409-01 TCGA-AN-A0AS-01 TCGA-AC-A7VC-01 TCGA-AR-A1AY-01 TCGA-JL-A3YW-01 TCGA-D8-A27H-01 TCGA-GM-A2DD-01 TCGA-E2-A1LK-01 TCGA-BH-A6R9-01 TCGA-AC-A62X-01 TCGA-AC-A8OQ-01 TCGA-AC-A2QH-01 TCGA-AC-A6IW-01 TCGA-E2-A1LL-01 TCGA-A8-A07O-01…	(0.9344025886513038, 2.477011385584943)	1.46173e-05	0.00562402	Basal	F	4.18e-13	21	0.12
DeBi	optimized	TCGA-RNAseq	1.30275	53	17	1.03392	DOWN	MAPK12 KLHL22 CRELD2 TOM1 MKL1 CORO1B RNH1 FKBP2 CLTB SMARCB1 FKBP8 POLR3H DHX38 CCDC124 CABIN1 DGCR2 PRR5 RPS19BP1 DGCR6 USF2 MRPL55 MPST DGCR6L DRAP1 TCF25 SDF2L1 DGCR14 FBXO31 ORAI2 MIB2 TTLL1 PKN1 GGA1 GCAT ALG12 GPATCH3 CCDC28B RBM42 KCTD17 FAM50A TRIOBP THAP7 TUBGCP6 TFIP11 STOML1 MAP3K10 FDX1L RHBDD3 RNF215 DNAL4 ZNF775 LZTR1 ZNF653	TCGA-AO-A1KS-01 TCGA-AR-A1AR-01 TCGA-A8-A09W-01 TCGA-BH-A18T-01 TCGA-A2-A25B-01 TCGA-AR-A0U2-01 TCGA-AR-A256-01 TCGA-AR-A24X-01 TCGA-D8-A1JA-01 TCGA-BH-A1FM-01 TCGA-BH-A1F8-01 TCGA-A2-A0YF-01 TCGA-BH-A1F2-01 TCGA-BH-A1F5-01 TCGA-C8-A12M-01 TCGA-D8-A1JN-01 TCGA-E2-A1AZ-01	(0.5839844195392843, 2.0215188985611254)	0.000381739	0.0435503	LumA	T	0.0144	496	0.51
DeBi	optimized	TCGA-RNAseq	1.54433	20	31	0.988685	DOWN	RERG PTPRT RAD17 LONRF2 ERBB4 ESR1 BTRC AFF3 AGR3 ARNT2 CASC1 ARSG SEPSECS RABEP1 SERPINA11 KIF5C MGEA5 GREB1 GLS2 BCL2	TCGA-EW-A6SD-01 TCGA-AN-A0G0-01 TCGA-AN-A0FL-01 TCGA-D8-A1JG-01 TCGA-A7-A6VV-01 TCGA-AC-A2QJ-01 TCGA-BH-A0EE-01 TCGA-PL-A8LZ-01 TCGA-LL-A5YP-01 TCGA-A2-A0T2-01 TCGA-A2-A0YJ-01 TCGA-E9-A1RH-01 TCGA-A8-A09G-01 TCGA-AC-A7VC-01 TCGA-JL-A3YW-01 TCGA-LL-A6FR-01 TCGA-A2-A3XV-01 TCGA-D8-A13Z-01 TCGA-D8-A1XK-01 TCGA-OL-A5D6-01 TCGA-OL-A5S0-01 TCGA-LL-A740-01 TCGA-D8-A1XQ-01 TCGA-AC-A62X-01 TCGA-A8-A07R-01…	(0.7734821307755009, 2.315174196396141)	8.61441e-05	0.022096	Basal	F	3.73e-07	17	0.09
DeBi	optimized	TCGA-RNAseq	1.81438	33	17	1.08952	DOWN	NEDD4 LZTFL1 CCNG2 MATR3 IKZF4 RICTOR DHX35 PPM1A CHD6 ZFYVE16 AFF1 KIAA1109 KIAA0825 NF1 PJA2 RBM39 EPB41L5 ZC3H7A ARID2 CSNK1G3 DMXL1 SEPSECS MDM1 UBR1 PHF20 KIF3A RBM43 LRBA PRDM10 PARP11 RHBDD1 WDR19 SPG11	TCGA-BH-A0E6-01 TCGA-AN-A0AL-01 TCGA-A2-A0T2-01 TCGA-LL-A5YM-01 TCGA-A2-A04P-01 TCGA-E9-A1NC-01 TCGA-A7-A6VW-01 TCGA-GM-A2DF-01 TCGA-A2-A3XU-01 TCGA-E2-A158-01 TCGA-A2-A3XW-01 TCGA-AN-A0FL-01 TCGA-LL-A6FR-01 TCGA-AC-A2QJ-01 TCGA-C8-A134-01 TCGA-AN-A0AR-01 TCGA-BH-A5IZ-01	(0.8035458333757879, 2.8252145463735)	0.000434805	0.0435503	Basal	F	5.85e-09	14	0.08
DeBi	optimized	TCGA-RNAseq	1.82787	31	14	1.10012	DOWN	ZNF236 ZFP14 OSBPL1A GON4L ANKRD12 NCOR1 MIB1 TULP4 SLMAP MAGI1 JMJD1C ZBTB33 SIN3A KIAA0430 ZNF180 SENP7 APPL1 ZDHHC21 EP300 SHANK2 LRP6 ARNT MED13L ZNF567 POGZ TLR5 GATAD2B SERAC1 GABPA IL17RD PHF3	TCGA-LL-A5YM-01 TCGA-C8-A8HP-01 TCGA-C8-A26X-01 TCGA-OL-A5RZ-01 TCGA-AO-A0J2-01 TCGA-AC-A2QJ-01 TCGA-E2-A1LE-01 TCGA-LL-A7SZ-01 TCGA-A7-A56D-01 TCGA-AR-A5QQ-01 TCGA-E9-A5FL-01 TCGA-A2-A3XV-01 TCGA-A2-A4S1-01 TCGA-AC-A62V-01	(0.7960077626637247, 2.8597300848454985)	0.000516717	0.0435503	Her2	F	0.0413	5	0.06
DeBi	optimized	TCGA-RNAseq	1.61089	19	20	0.87891	DOWN	PPM1G RECQL5 MRPL12 MRM1 CCHCR1 TAF15 NT5C UBTF CROCC DDX54 CEP250 NLE1 AATF GIT1 NUDT14 MYBBP1A BBC3 TP53I13 GALK1	TCGA-BH-A1F2-01 TCGA-EW-A1IY-01 TCGA-C8-A26V-01 TCGA-D8-A27V-01 TCGA-BH-A18J-01 TCGA-A7-A26G-01 TCGA-BH-A1F5-01 TCGA-BH-A0BP-01 TCGA-AN-A0XR-01 TCGA-D8-A1JA-01 TCGA-BH-A1FM-01 TCGA-E2-A1LS-01 TCGA-BH-A1EN-01 TCGA-BH-A1FD-01 TCGA-E9-A226-01 TCGA-D8-A1JN-01 TCGA-BH-A1EU-01 TCGA-D8-A1J8-01 TCGA-A2-A04W-01 TCGA-BH-A1EY-01	(0.9602107678269034, 2.261575625480016)	1.22051e-06	0.00187836	LumB	F	0.0473	8	0.04
DeBi	optimized	TCGA-RNAseq	1.35509	17	19	1.06144	DOWN	TRIP11 HECTD1 YY1 BAG5 CHD8 PAPOLA EIF5 STK38L RCOR1 ZC3H14 NUMB MARK3 SIPA1L1 ARID4A BTBD7 ATXN3 PPP2R5C	TCGA-EW-A423-01 TCGA-BH-A42T-01 TCGA-OL-A66N-01 TCGA-C8-A12X-01 TCGA-C8-A1HN-01 TCGA-A2-A0EQ-01 TCGA-LL-A9Q3-01 TCGA-A2-A3XU-01 TCGA-EW-A1IZ-01 TCGA-A2-A3XT-01 TCGA-AC-A2QH-01 TCGA-E9-A3HO-01 TCGA-E2-A1LE-01 TCGA-GM-A2DC-01 TCGA-WT-AB41-01 TCGA-AC-A2QJ-01 TCGA-UU-A93S-01 TCGA-B6-A3ZX-01 TCGA-AC-A62V-01	(0.5842106157399802, 2.12597681418481)	0.000570395	0.0435503	NA	NA	1	0	0
DeBi	optimized	TCGA-RNAseq	1.60667	15	18	1.00294	DOWN	TTLL1 TRIOBP KLHL22 TP53I13 DGCR2 PMVK PICK1 GGA1 RABEP2 DNAL4 BRF1 ALG12 CBY1 POLR3H FLYWCH1	TCGA-AO-A1KS-01 TCGA-AR-A1AR-01 TCGA-A8-A09W-01 TCGA-BH-A209-01 TCGA-E2-A15M-01 TCGA-BH-A1F5-01 TCGA-E2-A1II-01 TCGA-AR-A256-01 TCGA-BH-A1FM-01 TCGA-BH-A1F8-01 TCGA-BH-A1F2-01 TCGA-BH-A1FD-01 TCGA-D8-A1Y0-01 TCGA-BH-A0C3-01 TCGA-E9-A1R4-01 TCGA-A2-A3XZ-01 TCGA-D8-A1J8-01 TCGA-D8-A1XK-01	(0.9185055606710438, 2.2948299633957716)	4.74014e-06	0.00243169	LumA	T	0.00181	497	0.51
DeBi	optimized	TCGA-RNAseq	1.49097	12	21	1.0998	DOWN	SYTL5 SPEF2 EXOC6 KIAA0232 FOXA1 PER2 NPHP1 AR SALL2 PATZ1 FRY TRAF3IP1	TCGA-AR-A1AR-01 TCGA-BH-A18V-01 TCGA-E2-A14X-01 TCGA-E9-A3QA-01 TCGA-PL-A8LV-01 TCGA-A2-A0YJ-01 TCGA-OL-A66P-01 TCGA-E2-A1LK-01 TCGA-E2-A1LL-01 TCGA-BH-A1F6-01 TCGA-B6-A409-01 TCGA-EW-A1PB-01 TCGA-A2-A0CM-01 TCGA-LL-A6FR-01 TCGA-AC-A2QJ-01 TCGA-AR-A5QQ-01 TCGA-E2-A150-01 TCGA-E2-A1LH-01 TCGA-C8-A26X-01 TCGA-AR-A0U0-01 TCGA-GM-A2DD-01	(0.7234418169684984, 2.258503623534285)	0.000140468	0.0240201	Basal	F	2.46e-10	17	0.1
DeBi	optimized	TCGA-RNAseq	1.57549	11	18	1.16931	DOWN	RECQL5 GPS1 DUS1L SIRT7 ICT1 PCYT2 ANAPC11 MRPL38 SAP30BP TSEN54 WBP2	TCGA-AR-A1AR-01 TCGA-EW-A1IY-01 TCGA-A8-A07E-01 TCGA-BH-A1EV-01 TCGA-D8-A27V-01 TCGA-BH-A0C1-01 TCGA-D8-A1XJ-01 TCGA-BH-A0DD-01 TCGA-A7-A0DC-01 TCGA-A7-A0D9-01 TCGA-A7-A26F-01 TCGA-A2-A259-01 TCGA-BH-A18P-01 TCGA-E9-A226-01 TCGA-AO-A03V-01 TCGA-BH-A1EU-01 TCGA-A8-A0AD-01 TCGA-D8-A1J8-01	(0.7466379081483562, 2.4043419260547396)	0.000194914	0.0299973	NA	NA	1	0	0
DeBi	optimized	METABRIC	0.804733	112	68	0.631788	UP	ATP13A5 CDR2L CASP14 SLC25A18 MPHOSPH6 ASS1 FGFR4 LBP DLG3 ZP2 SUSD2 TTYH3 ABCD1 CDH3 IRX6 ERBB2 KRT20 CAMK2G ENPP3 MED1 ACOT9 SLC15A2 TSPAN8 HOMER3 ORMDL3 ORM2 LCT ACSL1 FA2H RAB43 GRB7 ACE2 SLC31A1 AKR1A1 PDZK1IP1 TRIB3 UBE2A PLXNB3 PPP1R1B SOX11 VPS37B CPA4 XDH CLDN8 GRAMD2 MALL TBC1D24 TMEM45A FGG EPHB4 VNN3 CNGA1 STARD3 PAX9 ABCA12 GLYATL2 SDC1 G6PD CALML5 S100A7A RALA NXPH4 CYP2J2 TLE1 FABP…	MB-4724 MB-4871 MB-5120 MB-4879 MB-3165 MB-7090 MB-4643 MB-5558 MB-4763 MB-7153 MB-6100 MB-3556 MB-2758 MB-3488 MB-5549 MB-5054 MB-5409 MB-3329 MB-5392 MB-6152 MB-0482 MB-0352 MB-5114 MB-0395 MB-7067 MB-0292 MB-0464 MB-6160 MB-0378 MB-6318 MB-6169 MB-4303 MB-5019 MB-6063 MB-3396 MB-0129 MB-4770 MB-2895 MB-3606 MB-2632 MB-7069 MB-5327 MB-3470 MB-7057 MB-5063 MB-0391 MB-2834 MB-3355 MB-0436 MB-2923…	(0.46840568992022735, 1.141060705305866)	2.73713e-06	0.00133298	Her2	F	3.4e-21	42	0.17
DeBi	optimized	METABRIC	0.936224	26	37	0.749189	UP	NKD1 MORC4 SERHL2 MAPK10 CLCA2 GPRC5C SOX11 MPHOSPH6 SUSD2 TRPV6 ERBB2 CRAT ENPP3 GGT1 FGFR4 ABCC12 TCAP ABCA12 DUSP6 ALDH4A1 SERHL CCDC81 S100A7A PNMT GRB7 ALOX15B	MB-5628 MB-3386 MB-4643 MB-4879 MB-6100 MB-3025 MB-3556 MB-3488 MB-5441 MB-5281 MB-7069 MB-0506 MB-2754 MB-6160 MB-0378 MB-4791 MB-0035 MB-7143 MB-5593 MB-4731 MB-5275 MB-5417 MB-5411 MB-6182 MB-5148 MB-5652 MB-3355 MB-2923 MB-0346 MB-4341 MB-5458 MB-2513 MB-7196 MB-2517 MB-0221 MB-2964 MB-6082	(0.5107229120680907, 1.3617250378465997)	1.61433e-05	0.00410743	Her2	F	9.73e-19	29	0.13
DeBi	optimized	METABRIC	0.896364	27	34	0.844853	UP	SLC4A11 SLC5A6 DTX2 LCN2 LIMK1 S100A11 PDZK1IP1 RASAL1 LBP SOX11 ATP13A5 CPA4 COL13A1 S100A9 S100A8 USP6NL TRPV6 NT5C2 KCNS1 CLIC3 PROM1 GIPC1 SLC15A1 SLPI CALML5 PRSS27 FUT3	MB-4871 MB-0582 MB-4601 MB-7159 MB-4643 MB-5624 MB-5058 MB-0399 MB-7020 MB-5229 MB-5482 MB-4146 MB-0316 MB-4350 MB-0035 MB-0593 MB-7165 MB-5327 MB-5535 MB-0149 MB-4881 MB-3355 MB-2922 MB-5232 MB-5213 MB-3453 MB-4360 MB-2742 MB-0643 MB-0664 MB-6063 MB-4012 MB-0663 MB-5335	(0.4880582952096224, 1.304669183819086)	1.68683e-05	0.00410743	Basal	F	1.89e-06	15	0.07
DeBi	optimized	METABRIC	0.929907	20	27	0.970442	UP	RNASE1 RARRES2 FCGR2B VSIG4 PLAU PLAUR SLC16A3 TREM1 NT5E PDPN VMO1 SPP1 BCAT1 MXRA7 OSCAR TGFBI LILRA2 ADORA3 HSD17B6 MSR1	MB-6049 MB-0446 MB-3754 MB-0525 MB-2792 MB-0010 MB-2669 MB-0131 MB-2939 MB-0494 MB-0495 MB-3266 MB-2896 MB-5632 MB-0601 MB-0877 MB-0164 MB-0436 MB-0421 MB-3379 MB-0660 MB-2742 MB-3582 MB-0269 MB-0249 MB-0202 MB-0502	(0.4721891028375203, 1.3876251251242688)	6.83684e-05	0.0133182	claudin-low	F	0.0217	8	0.04
DeBi	optimized	METABRIC	1.43614	19	20	1.09722	UP	RPL3 SNRPD2 RPSA RPL36 EEF1G RPL27A RPL18A RPL35A RPL30 EEF1B2 RPL13A RPS5 RPS3 RPL11 RPL12 RPL24 RPL18 RPL27 RPS9	MB-0509 MB-0582 MB-4715 MB-0659 MB-7048 MB-7049 MB-2724 MB-5513 MB-0517 MB-6251 MB-0536 MB-0123 MB-7018 MB-0373 MB-0372 MB-4696 MB-7289 MB-0485 MB-2954 MB-0350	(0.8623067654263256, 2.009982716025264)	9.33306e-07	0.00090904	Basal	F	0.00173	8	0.04
FABIA	optimized	TCGA-RNAseq	0.63922	15	271	0.674278		NEDD8 NGDN OXA1L ACIN1 PRMT5 APEX1 TINF2 TOX4 TM9SF1 RBM23 GMPR2 IPO4 DAD1 PSMB5 RNF31	TCGA-AR-A1AH-01 TCGA-D8-A1JM-01 TCGA-AR-A1AI-01 TCGA-BH-A0AW-01 TCGA-A7-A26G-01 TCGA-E9-A1NF-01 TCGA-BH-A18H-01 TCGA-BH-A1FH-01 TCGA-A2-A3XU-01 TCGA-AR-A255-01 TCGA-C8-A137-01 TCGA-A7-A6VY-01 TCGA-D8-A1JG-01 TCGA-EW-A1P7-01 TCGA-D8-A1XA-01 TCGA-D8-A1XG-01 TCGA-GM-A2DA-01 TCGA-D8-A1XT-01 TCGA-BH-A42T-01 TCGA-A7-A2KD-01 TCGA-E2-A1II-01 TCGA-S3-AA15-01 TCGA-D8-A27I-01 TCGA-A2-A0YD-01 TCGA-A8-A08H-01…	(0.2935531222959506, 0.9848861617663665)	0.000289589	0.00897724	Basal	F	1.17e-43	121	0.41
FABIA	optimized	TCGA-RNAseq	0.659456	14	324	0.65889		DHX8 TUBG1 BECN1 RAB5C VPS25 TMUB2 DNAJC7 LSM12 PSME3 EFTUD2 NMT1 NKIRAS2 MLX ATXN7L3	TCGA-3C-AALK-01 TCGA-BH-A1FH-01 TCGA-AC-A5EH-01 TCGA-BH-A18J-01 TCGA-BH-A0BL-01 TCGA-A2-A0SY-01 TCGA-A2-A25A-01 TCGA-AC-A62Y-01 TCGA-BH-A18H-01 TCGA-BH-A0HF-01 TCGA-E9-A3X8-01 TCGA-AO-A0J2-01 TCGA-C8-A137-01 TCGA-A7-A6VY-01 TCGA-AN-A04A-01 TCGA-D8-A1JG-01 TCGA-C8-A1HL-01 TCGA-AR-A1AP-01 TCGA-GM-A2DA-01 TCGA-D8-A1XT-01 TCGA-A2-A4S1-01 TCGA-AC-A23H-01 TCGA-AR-A0U3-01 TCGA-E2-A1II-01 TCGA-EW-A6SD-01…	(0.31769370533065056, 1.0012188082104911)	0.000155638	0.00897724	LumA	T	5.1e-16	406	0.52
ISA2	default	METABRIC	0.511476	478	82	0.530259		DUOXA1 RNF11 HIST1H4E HIST1H4H P4HA1 TMEM87B SPTLC2 SLC26A3 ABCD1 SV2C IRX6 SLPI ZNF689 DIAPH1 CAMK2G LMTK3 PRRG1 ORM2 GRB10 SPPL2A ACE2 MMP15 MGST1 SWAP70 COX7B2 APOD SOX11 MYPN LSS DIO2 TBC1D24 NR1H4 CCDC57 FIBCD1 COL4A3 CHST1 MCCC1 ZDHHC3 GLYATL2 DNAJC3 FTCD ZNF350 WDFY2 GABRE ECHDC2 EFCAB3 CYP2J2 ACP6 TLE1 SLC2A14 SERHL2 ANKRD37 MTFR1 CLCA2 TMPRSS11D GPRC5C GPRC5B OXER1 CYP2R1 NEDD4 S100A9 S1…	MB-4724 MB-4871 MB-6107 MB-6169 MB-4643 MB-7066 MB-4763 MB-5072 MB-6103 MB-6100 MB-6224 MB-0522 MB-0152 MB-3488 MB-0292 MB-4886 MB-5441 MB-5281 MB-5315 MB-5019 MB-7069 MB-5409 MB-7045 MB-7020 MB-5229 MB-0391 MB-7187 MB-5392 MB-5110 MB-5549 MB-2754 MB-0588 MB-0378 MB-7008 MB-6152 MB-6330 MB-4993 MB-0581 MB-7281 MB-0230 MB-4333 MB-7143 MB-4712 MB-5511 MB-6114 MB-7208 MB-3295 MB-6318 MB-4276 MB-7135…	(0.20013019218415434, 0.8228211176557272)	0.00128275	0.0436134	Her2	F	2.36e-29	52	0.21
ISA2	optimized	METABRIC	0.511476	478	82	0.530259		DUOXA1 RNF11 HIST1H4E HIST1H4H P4HA1 TMEM87B SPTLC2 SLC26A3 ABCD1 SV2C IRX6 SLPI ZNF689 DIAPH1 CAMK2G LMTK3 PRRG1 ORM2 GRB10 SPPL2A ACE2 MMP15 MGST1 SWAP70 COX7B2 APOD SOX11 MYPN LSS DIO2 TBC1D24 NR1H4 CCDC57 FIBCD1 COL4A3 CHST1 MCCC1 ZDHHC3 GLYATL2 DNAJC3 FTCD ZNF350 WDFY2 GABRE ECHDC2 EFCAB3 CYP2J2 ACP6 TLE1 SLC2A14 SERHL2 ANKRD37 MTFR1 CLCA2 TMPRSS11D GPRC5C GPRC5B OXER1 CYP2R1 NEDD4 S100A9 S1…	MB-4724 MB-4871 MB-6107 MB-6169 MB-4643 MB-7066 MB-4763 MB-5072 MB-6103 MB-6100 MB-6224 MB-0522 MB-0152 MB-3488 MB-0292 MB-4886 MB-5441 MB-5281 MB-5315 MB-5019 MB-7069 MB-5409 MB-7045 MB-7020 MB-5229 MB-0391 MB-7187 MB-5392 MB-5110 MB-5549 MB-2754 MB-0588 MB-0378 MB-7008 MB-6152 MB-6330 MB-4993 MB-0581 MB-7281 MB-0230 MB-4333 MB-7143 MB-4712 MB-5511 MB-6114 MB-7208 MB-3295 MB-6318 MB-4276 MB-7135…	(0.20013019218415434, 0.8228211176557272)	0.00128275	0.0397652	Her2	F	2.15e-29	52	0.21
QUBIC	default	TCGA-RNAseq	1.123	27	53	0.896806		LEMD1 OR1L1 C1orf64 XBP1 SLC39A12 TBC1D9 GAGE1 ANKRD30A DNALI1 ZIC4 PLA2G4E FGFBP1 ZIC1 PDHA2 ART3 ROPN1 PRR15 CA12 NR2E1 GATA3 FSIP1 ESR1 AGR2 AGR3 FOXA1 SPP2 MLPH	TCGA-BH-A0BL-01 TCGA-BH-A0WA-01 TCGA-BH-A18T-01 TCGA-A7-A26G-01 TCGA-A2-A3XY-01 TCGA-GM-A3XL-01 TCGA-A7-A6VY-01 TCGA-EW-A1P8-01 TCGA-AN-A0XU-01 TCGA-A2-A0CM-01 TCGA-EW-A1P7-01 TCGA-B6-A0RE-01 TCGA-E2-A14X-01 TCGA-E9-A22G-01 TCGA-A2-A0YJ-01 TCGA-AQ-A04J-01 TCGA-A2-A0T0-01 TCGA-OL-A5RX-01 TCGA-S3-AA10-01 TCGA-B6-A0X1-01 TCGA-HN-A2NL-01 TCGA-C8-A134-01 TCGA-A1-A0SK-01 TCGA-PL-A8LV-01 TCGA-A2-A0YM-01…	(0.486523177315207, 1.759484378832366)	0.000543893	0.0375287	Basal	F	2.94e-36	48	0.28
QUBIC	default	METABRIC	0.610645	18	101	1.25774		PSAT1 VGLL1 SKP2 SF3B3 ESR1 CCNE1 BCL11A AGR3 GATA3 CA12 FOXA1 CDCA7 SLC44A4 TFF3 MLPH PPP1R14C C1orf64 XBP1	MB-5482 MB-0874 MB-0639 MB-5335 MB-0869 MB-5138 MB-4332 MB-5565 MB-5566 MB-2753 MB-0238 MB-7165 MB-6178 MB-4715 MB-4714 MB-4717 MB-7205 MB-3292 MB-3057 MB-7052 MB-7054 MB-6188 MB-4407 MB-7114 MB-4408 MB-4911 MB-6245 MB-0150 MB-5465 MB-0656 MB-5468 MB-4146 MB-4416 MB-4417 MB-0316 MB-4793 MB-4792 MB-5560 MB-6251 MB-3476 MB-5299 MB-5296 MB-5295 MB-5294 MB-3277 MB-5450 MB-4548 MB-0664 MB-6068 MB-4660…	(0.3038051464679772, 0.917485725974388)	9.59781e-05	0.00959781	Basal	F	4.71e-58	76	0.34
QUBIC	optimized	TCGA-RNAseq	0.511676	501	219	0.804893		TAP2 PRKAG3 ZDHHC18 IFNAR2 ANP32E GPM6B LEMD1 ZNF703 SLC43A3 MEMO1 JRKL RNASEH1 NUP93 CAMKV IFRD1 ABLIM3 OCA2 OSBPL3 IQCH GATA3 F7 BAK1 POP1 MAG PRR15 ACE2 CSRP2 YBX1 EVL RRP1B C5orf30 FAM64A GABBR2 SOX11 TTK ZIC4 RASEF NFIL3 MED30 TMEM123 RPH3AL THSD4 KCNK15 NCAPD2 SLC39A9 PPARA CHST3 CHST2 CHST4 FSIP1 SFT2D2 SLC26A9 MTHFD1L SBSN GABRP SLC22A5 FBXO36 SERBP1 CRIP1 INA FOXC1 KRT18 TLE3 RET RHOB PO…	TCGA-BH-A0BL-01 TCGA-AR-A1AH-01 TCGA-D8-A1JM-01 TCGA-AR-A1AI-01 TCGA-A7-A26G-01 TCGA-A7-A13G-01 TCGA-A2-A3XU-01 TCGA-A7-A6VY-01 TCGA-EW-A1P7-01 TCGA-AC-A2QJ-01 TCGA-AR-A5QQ-01 TCGA-E9-A5FL-01 TCGA-BH-A0W3-01 TCGA-E2-A1II-01 TCGA-S3-AA15-01 TCGA-EW-A6SB-01 TCGA-A2-A0YJ-01 TCGA-AQ-A04J-01 TCGA-B6-A3ZX-01 TCGA-A2-A0T0-01 TCGA-A2-A25F-01 TCGA-S3-AA10-01 TCGA-AC-A7VC-01 TCGA-A8-A08R-01 TCGA-JL-A3YW-01…	(0.10581790929120166, 0.9175343788273531)	0.0134744	0.0269488	Basal	F	1.61e-159	170	0.85
QUBIC	optimized	METABRIC	0.232683	489	301	0.652828		TAP1 EXO1 PCSK4 IL6ST IFNAR2 GPM6B MEMO1 IRAK1 IGF1R SIRPA MUC1 NUP93 SCCPDH IFRD1 FMNL2 IQCK OSBPL3 CXCL13 GATA3 PRRG2 ZNF670 POP1 ACE2 CSRP2 YBX1 EVL MMP12 BBOX1 MTL5 C1orf21 FAM64A GABBR2 LILRB3 CHCHD5 SOX11 MRFAP1L1 BCDIN3D NFIL3 TMEM123 MALL THSD4 KCNK12 CHST3 GARS MCCC1 GSTO2 CSNK1A1 GZMB GLYATL2 MTHFD1L GABRP SLC22A5 EFCAB6 CRIP1 FAM134B FOXC1 KRT18 NPDC1 RET MPP6 NUDT16L1 CDC123 RGMA PELI…	MB-4722 MB-4769 MB-5482 MB-0582 MB-4893 MB-0874 MB-0639 MB-5335 MB-0869 MB-5409 MB-4974 MB-5138 MB-3063 MB-7027 MB-0157 MB-7025 MB-0540 MB-4601 MB-7020 MB-5566 MB-2753 MB-5560 MB-5244 MB-5572 MB-0303 MB-0238 MB-2957 MB-4711 MB-7165 MB-6178 MB-4715 MB-4714 MB-6272 MB-5348 MB-4845 MB-3297 MB-7205 MB-3502 MB-4969 MB-5232 MB-3211 MB-5145 MB-3058 MB-3057 MB-5279 MB-3218 MB-0129 MB-7052 MB-5474 MB-7055…	(0.036398819321752734, 0.4289679913341755)	0.0201567	0.0201567	Basal	F	2.91e-103	157	0.46
QUBIC	optimized	METABRIC	0.259646	262	371	0.590082		CD38 FLVCR2 TCTN1 WWP1 IL6ST SERPINA11 CPA4 PKP1 RASAL1 CLSTN2 RARA PI3 FMNL2 C17orf58 DSC2 MPP6 EML4 PDE7A PLA2G7 C21orf91 CSRP2 SYTL4 SUSD3 ZNF552 LYN TRPV6 SLC16A10 ERBB3 IGF1R MALL SOD2 SIRPA LDHB NUP93 CMBL CENPA AQP9 FSIP1 TNFRSF21 KCNN4 SSH3 PROM1 ACOT9 CACNA2D2 OSBPL3 ACOT4 NXN GATA3 RAB27B DYSF ZNF670 CCND1 SLC2A6 MAGED2 NME3 ST8SIA1 RBM38 FOXA1 RUNX3 GFRA1 ZNF446 RNF103 HDAC11 WFS1 YBX1…	MB-5482 MB-5135 MB-5138 MB-0540 MB-0238 MB-4416 MB-6178 MB-4962 MB-6271 MB-6272 MB-4845 MB-4969 MB-2742 MB-6188 MB-6189 MB-3165 MB-5260 MB-0150 MB-0157 MB-3046 MB-5465 MB-0658 MB-0654 MB-0656 MB-5468 MB-4996 MB-6075 MB-4254 MB-0593 MB-4770 MB-5213 MB-7078 MB-7076 MB-5602 MB-4602 MB-4601 MB-7090 MB-7154 MB-7155 MB-7151 MB-5070 MB-3467 MB-5173 MB-5079 MB-5378 MB-0500 MB-0278 MB-5370 MB-4672 MB-0378…	(0.0828797183257571, 0.43641155990784664)	0.00399031	0.0106556	Basal	F	4.05e-97	165	0.41
QUBIC	optimized	METABRIC	0.233547	218	405	0.567334		CD38 FLVCR2 TCTN1 WWP1 IL6ST SERPINA11 CPA4 PKP1 RASAL1 CLSTN2 FMNL2 DSC2 MPP6 EML4 PLA2G7 SYTL4 SUSD3 ZNF552 LYN TRPV6 ERBB3 IGF1R MALL SOD2 ZMYND10 LDHB NUP93 CENPA AQP9 FSIP1 KCNN4 PROM1 CACNA2D2 ACOT4 PI3 GATA3 ZNF446 NME3 SLC2A6 MAGED2 FOXA1 RUNX3 GFRA1 NCOA7 RNF103 HDAC11 WFS1 YBX1 FBP1 STARD10 EVL SLC7A8 BBOX1 KCNG1 SLC7A5 RASSF4 MTL5 KLHDC9 PNMA3 NEK11 PLEKHG1 TGFA YEATS2 SLC9A6 MARCO CHC…	MB-5482 MB-5135 MB-5138 MB-0540 MB-0467 MB-7104 MB-0238 MB-4416 MB-6178 MB-4962 MB-6271 MB-6272 MB-4845 MB-4969 MB-4329 MB-2742 MB-6188 MB-6189 MB-3165 MB-0152 MB-5260 MB-0150 MB-0157 MB-3046 MB-5465 MB-0658 MB-4993 MB-0656 MB-5468 MB-4996 MB-6075 MB-4254 MB-0593 MB-4770 MB-7267 MB-5215 MB-7079 MB-7078 MB-7076 MB-7073 MB-5602 MB-4602 MB-4601 MB-7090 MB-7154 MB-7155 MB-7151 MB-5070 MB-3467 MB-5173…	(0.06350485282097468, 0.4035894076513565)	0.00710373	0.0106556	Basal	F	3.16e-98	171	0.39
DESMOND	optimized	TCGA-RNAseq	-0.547177	3	443	0.914542	UP	PSME2 PSMB1 PSME1	TCGA-OL-A66H-01 TCGA-3C-AALK-01 TCGA-EW-A2FW-01 TCGA-AR-A1AJ-01 TCGA-AC-A62Y-01 TCGA-E9-A1QZ-01 TCGA-E9-A1R2-01 TCGA-E9-A3X8-01 TCGA-AO-A0JD-01 TCGA-EW-A2FS-01 TCGA-AO-A1KQ-01 TCGA-A8-A0A6-01 TCGA-AO-A128-01 TCGA-A7-A3IY-01 TCGA-B6-A0IE-01 TCGA-GM-A2D9-01 TCGA-AR-A1AT-01 TCGA-EW-A1P5-01 TCGA-B6-A0RO-01 TCGA-LD-A66U-01 TCGA-AO-A0J8-01 TCGA-BH-A0DZ-01 TCGA-E9-A3QA-01 TCGA-A2-A0D4-01 TCGA-A2-A0YC-01…	(-0.9010209646896119, -0.19333381721588627)	0.00243864	0.0471594	LumB	F	2.57e-05	111	0.22
DESMOND	optimized	TCGA-RNAseq	0.561447	3	493	0.908189	UP	LMNB1 TUBB SF3B3	TCGA-AR-A1AH-01 TCGA-EW-A2FW-01 TCGA-AR-A1AJ-01 TCGA-AR-A255-01 TCGA-AO-A0JD-01 TCGA-D8-A1JD-01 TCGA-AO-A1KQ-01 TCGA-B6-A0IE-01 TCGA-AR-A1AT-01 TCGA-AQ-A04J-01 TCGA-E9-A1NA-01 TCGA-BH-A1FN-01 TCGA-BH-A0DZ-01 TCGA-EW-A1PD-01 TCGA-BH-A18Q-01 TCGA-D8-A1J8-01 TCGA-E9-A3QA-01 TCGA-A7-A0CE-01 TCGA-LL-A6FR-01 TCGA-A2-A3XX-01 TCGA-A2-A0D4-01 TCGA-E2-A1B0-01 TCGA-EW-A1IW-01 TCGA-EW-A6S9-01 TCGA-AO-A03M-01…	(0.2251551184083509, 0.8977389556268713)	0.00106712	0.0387721	LumA	T	1.99e-70	400	0.65
DESMOND	optimized	TCGA-RNAseq	0.617447	3	486	0.899382	UP	CCT8 CCT6A CCT5	TCGA-OL-A66H-01 TCGA-AR-A1AH-01 TCGA-EW-A2FW-01 TCGA-AR-A1AJ-01 TCGA-E2-A10B-01 TCGA-AO-A0JD-01 TCGA-AO-A1KQ-01 TCGA-BH-A0GZ-01 TCGA-AO-A128-01 TCGA-B6-A0IE-01 TCGA-AR-A1AT-01 TCGA-AQ-A04J-01 TCGA-BH-A1EN-01 TCGA-BH-A1FN-01 TCGA-BH-A0DZ-01 TCGA-EW-A1PD-01 TCGA-D8-A1J8-01 TCGA-E2-A15R-01 TCGA-E9-A3QA-01 TCGA-A7-A0CE-01 TCGA-A2-A3XX-01 TCGA-A2-A0D4-01 TCGA-GM-A2DC-01 TCGA-E2-A1B0-01 TCGA-EW-A1IW-01…	(0.28220451820462744, 0.9526898291588323)	0.000306379	0.0206391	LumA	T	2.91e-52	384	0.6
DESMOND	optimized	TCGA-RNAseq	0.508421	3	373	0.890292	UP	KCMF1 PSMB2 PSMD12	TCGA-AR-A1AH-01 TCGA-AR-A1AJ-01 TCGA-E9-A1R2-01 TCGA-GM-A2DK-01 TCGA-AO-A0JD-01 TCGA-EW-A2FS-01 TCGA-E9-A5FL-01 TCGA-B6-A0IE-01 TCGA-E9-A1ND-01 TCGA-AQ-A04J-01 TCGA-AR-A1AQ-01 TCGA-BH-A1EN-01 TCGA-BH-A1FN-01 TCGA-D8-A1J8-01 TCGA-E9-A3QA-01 TCGA-A7-A0CE-01 TCGA-A2-A3XX-01 TCGA-A2-A0D4-01 TCGA-E2-A1B0-01 TCGA-BH-A1EY-01 TCGA-EW-A6S9-01 TCGA-AO-A03M-01 TCGA-A2-A3XT-01 TCGA-C8-A1HM-01 TCGA-B6-A0IQ-01…	(0.1721101317591232, 0.8447312176188657)	0.00304662	0.049459	LumA	T	2.07e-75	454	0.67
DESMOND	optimized	TCGA-RNAseq	-0.687214	3	460	0.887302	UP	PSME1 PSME2 CTRL	TCGA-OL-A66H-01 TCGA-3C-AALK-01 TCGA-AR-A1AJ-01 TCGA-WT-AB44-01 TCGA-AC-A62Y-01 TCGA-E9-A1QZ-01 TCGA-E9-A1R2-01 TCGA-E9-A3X8-01 TCGA-AO-A0JD-01 TCGA-EW-A2FS-01 TCGA-AO-A1KQ-01 TCGA-A8-A0A6-01 TCGA-A7-A3IY-01 TCGA-B6-A0IE-01 TCGA-GM-A2D9-01 TCGA-AR-A1AT-01 TCGA-AQ-A04J-01 TCGA-B6-A0RO-01 TCGA-AR-A1AQ-01 TCGA-LD-A66U-01 TCGA-AO-A0J8-01 TCGA-A8-A08R-01 TCGA-BH-A0DZ-01 TCGA-E9-A1N5-01 TCGA-E9-A3QA-01…	(-1.045441226829395, -0.3289876424154826)	0.000169946	0.0177086	LumA	T	9.21e-05	312	0.42
DESMOND	optimized	TCGA-RNAseq	0.542665	3	453	0.886256	UP	KPNB1 NUP93 SF3B3	TCGA-AR-A1AH-01 TCGA-EW-A2FW-01 TCGA-AR-A1AJ-01 TCGA-E9-A1R2-01 TCGA-AR-A255-01 TCGA-AO-A0JD-01 TCGA-D8-A1XA-01 TCGA-AO-A1KQ-01 TCGA-AO-A128-01 TCGA-B6-A0IE-01 TCGA-E9-A1ND-01 TCGA-AQ-A04J-01 TCGA-E9-A1NA-01 TCGA-BH-A1FN-01 TCGA-EW-A1PD-01 TCGA-E9-A3QA-01 TCGA-A7-A0CE-01 TCGA-A2-A3XX-01 TCGA-A2-A0D4-01 TCGA-E2-A1B0-01 TCGA-AO-A03M-01 TCGA-A7-A4SE-01 TCGA-LL-A7SZ-01 TCGA-A1-A0SJ-01 TCGA-C8-A1HM-01…	(0.20946144467268674, 0.8758676306077569)	0.00141264	0.0399874	LumA	T	4.5e-57	406	0.62
DESMOND	optimized	TCGA-RNAseq	0.671304	3	437	0.885601	UP	CCT6A CCT7 CCT5	TCGA-OL-A66H-01 TCGA-AR-A1AH-01 TCGA-AR-A1AJ-01 TCGA-E9-A1R2-01 TCGA-AO-A0JD-01 TCGA-D8-A1JD-01 TCGA-AO-A1KQ-01 TCGA-B6-A0IE-01 TCGA-AQ-A04J-01 TCGA-BH-A1EN-01 TCGA-A8-A08R-01 TCGA-BH-A0DZ-01 TCGA-E9-A3QA-01 TCGA-A7-A0CE-01 TCGA-LL-A6FR-01 TCGA-A2-A3XX-01 TCGA-A2-A0D4-01 TCGA-GM-A2DC-01 TCGA-E2-A1B0-01 TCGA-EW-A6S9-01 TCGA-AO-A03M-01 TCGA-LL-A7SZ-01 TCGA-A1-A0SJ-01 TCGA-C8-A1HM-01 TCGA-B6-A0IQ-01…	(0.3391413089055891, 1.003467621023189)	7.46042e-05	0.0177086	LumA	T	5.1e-50	403	0.61
DESMOND	optimized	TCGA-RNAseq	-0.521008	3	513	0.880872	DOWN	HSP90AA1 HSPA8 HSPH1	TCGA-OL-A66H-01 TCGA-3C-AALK-01 TCGA-AR-A1AH-01 TCGA-AC-A5EH-01 TCGA-E9-A1R0-01 TCGA-AC-A62Y-01 TCGA-E9-A1R2-01 TCGA-E9-A3X8-01 TCGA-AR-A255-01 TCGA-EW-A2FS-01 TCGA-D8-A1XA-01 TCGA-E9-A5FL-01 TCGA-A8-A0A6-01 TCGA-AN-A0XL-01 TCGA-B6-A0IE-01 TCGA-GM-A2D9-01 TCGA-D8-A3Z5-01 TCGA-AN-A03X-01 TCGA-LD-A66U-01 TCGA-BH-A0W4-01 TCGA-E9-A1N5-01 TCGA-E9-A3QA-01 TCGA-BH-A0EB-01 TCGA-GM-A2DK-01 TCGA-A2-A0CQ-01…	(-0.858231622192795, -0.18378504656501504)	0.00246068	0.0471594	LumA	F	1.58e-16	293	0.45
DESMOND	optimized	TCGA-RNAseq	0.557662	3	506	0.877583	UP	HSP90AA1 HSPH1 PGK1	TCGA-EW-A2FW-01 TCGA-AR-A1AJ-01 TCGA-E2-A10B-01 TCGA-AO-A0JD-01 TCGA-D8-A1JD-01 TCGA-A8-A08L-01 TCGA-A7-A3RF-01 TCGA-A2-A0SW-01 TCGA-AR-A1AT-01 TCGA-AQ-A04J-01 TCGA-B6-A0RO-01 TCGA-BH-A1EN-01 TCGA-A8-A08R-01 TCGA-BH-A0DZ-01 TCGA-EW-A1PD-01 TCGA-D8-A1J8-01 TCGA-E2-A15R-01 TCGA-A7-A0CE-01 TCGA-A2-A3XX-01 TCGA-A2-A0D4-01 TCGA-GM-A2DC-01 TCGA-E2-A1B0-01 TCGA-BH-A1EY-01 TCGA-EW-A6S9-01 TCGA-AQ-A0Y5-01…	(0.22188954695508484, 0.8934354020455177)	0.00113324	0.0389753	LumA	T	1.47e-27	342	0.52
DESMOND	optimized	TCGA-RNAseq	0.610375	3	441	0.873966	UP	YWHAZ CDCA7 GINS4	TCGA-AR-A1AH-01 TCGA-EW-A2FW-01 TCGA-AR-A1AJ-01 TCGA-E9-A1R2-01 TCGA-D8-A1JD-01 TCGA-E9-A5FL-01 TCGA-AO-A128-01 TCGA-B6-A0IE-01 TCGA-AR-A1AT-01 TCGA-AQ-A04J-01 TCGA-E9-A1NA-01 TCGA-BH-A1FN-01 TCGA-BH-A0DZ-01 TCGA-D8-A1J8-01 TCGA-E9-A3QA-01 TCGA-A7-A0CE-01 TCGA-A2-A3XX-01 TCGA-A2-A0D4-01 TCGA-AR-A24N-01 TCGA-E2-A1B0-01 TCGA-EW-A1IW-01 TCGA-EW-A6S9-01 TCGA-AO-A03M-01 TCGA-A2-A3XT-01 TCGA-A7-A4SE-01…	(0.2775884104948818, 0.94316252592761)	0.0003246	0.0206391	LumA	T	5.97e-71	425	0.66
DESMOND	optimized	TCGA-RNAseq	0.58517	3	377	0.871185	UP	PABPC4 YBX1 SF3A2	TCGA-OL-A66H-01 TCGA-3C-AALK-01 TCGA-AR-A1AH-01 TCGA-GM-A2DK-01 TCGA-C8-A1HL-01 TCGA-E9-A5FL-01 TCGA-A7-A3RF-01 TCGA-A2-A0SW-01 TCGA-B6-A0IE-01 TCGA-GM-A2D9-01 TCGA-AR-A1AT-01 TCGA-AQ-A04J-01 TCGA-BH-A1FN-01 TCGA-EW-A1PD-01 TCGA-E9-A3QA-01 TCGA-A7-A0CE-01 TCGA-A2-A3XX-01 TCGA-E2-A1B0-01 TCGA-BH-A1EY-01 TCGA-BH-A18K-01 TCGA-A2-A3XT-01 TCGA-A7-A4SE-01 TCGA-Z7-A8R5-01 TCGA-AR-A2LJ-01 TCGA-B6-A0IQ-01…	(0.24389418669416912, 0.9264459014140434)	0.000777564	0.0312253	Basal	F	7.54e-57	150	0.42
DESMOND	optimized	TCGA-RNAseq	0.62931	3	474	0.867852	UP	TKT GAPDH PRDX1	TCGA-AR-A1AH-01 TCGA-AC-A5EH-01 TCGA-AR-A1AJ-01 TCGA-E9-A3X8-01 TCGA-AO-A0JD-01 TCGA-D8-A1JD-01 TCGA-D8-A1XA-01 TCGA-E9-A5FL-01 TCGA-BH-A0GZ-01 TCGA-A7-A3RF-01 TCGA-A2-A0SW-01 TCGA-B6-A0IE-01 TCGA-AR-A1AT-01 TCGA-AQ-A04J-01 TCGA-LD-A66U-01 TCGA-BH-A1EN-01 TCGA-BH-A1FN-01 TCGA-BH-A0DZ-01 TCGA-E9-A3QA-01 TCGA-A7-A0CE-01 TCGA-A2-A3XX-01 TCGA-GM-A2DK-01 TCGA-AR-A24N-01 TCGA-E2-A1B0-01 TCGA-EW-A6S9-01…	(0.2927036420512204, 0.9659166130034309)	0.000248022	0.0206391	LumA	T	4.13e-36	372	0.56
DESMOND	optimized	TCGA-RNAseq	0.753732	3	505	0.866646	UP	C1orf112 RAD51 FIGNL1	TCGA-AR-A1AH-01 TCGA-EW-A2FW-01 TCGA-BH-A0BL-01 TCGA-AR-A1AJ-01 TCGA-E9-A1QZ-01 TCGA-AO-A0JD-01 TCGA-D8-A1JD-01 TCGA-A8-A08L-01 TCGA-AN-A0XL-01 TCGA-B6-A0IE-01 TCGA-AR-A1AT-01 TCGA-AQ-A04J-01 TCGA-BH-A1EN-01 TCGA-A8-A08R-01 TCGA-EW-A1PD-01 TCGA-A8-A07B-01 TCGA-D8-A1J8-01 TCGA-E2-A15R-01 TCGA-A7-A0CE-01 TCGA-LL-A6FR-01 TCGA-A2-A3XX-01 TCGA-AR-A24N-01 TCGA-E2-A1B0-01 TCGA-EW-A1IW-01 TCGA-GM-A2DN-01…	(0.4092554659301618, 1.0982088291569694)	1.79885e-05	0.0137252	LumA	T	1.13e-58	384	0.61
DESMOND	optimized	TCGA-RNAseq	0.618183	3	455	0.862327	UP	YWHAB YWHAZ STK3	TCGA-AR-A1AH-01 TCGA-E9-A1QZ-01 TCGA-E9-A1R2-01 TCGA-AR-A255-01 TCGA-AO-A0JD-01 TCGA-D8-A1JD-01 TCGA-A8-A08L-01 TCGA-B6-A0IE-01 TCGA-AQ-A04J-01 TCGA-BH-A1FN-01 TCGA-BH-A0DZ-01 TCGA-EW-A1PD-01 TCGA-A8-A07B-01 TCGA-D8-A1J8-01 TCGA-E2-A15R-01 TCGA-E9-A3QA-01 TCGA-A2-A3XX-01 TCGA-A2-A0D4-01 TCGA-GM-A2DC-01 TCGA-AR-A24N-01 TCGA-E2-A1B0-01 TCGA-BH-A1EY-01 TCGA-AO-A03M-01 TCGA-A1-A0SJ-01 TCGA-AQ-A1H3-01…	(0.2854208750124106, 0.9509446701671731)	0.000271486	0.0206391	LumA	T	5.83e-23	360	0.52
DESMOND	optimized	TCGA-RNAseq	0.538975	3	465	0.861899	UP	YWHAZ ENO1 MTFR1	TCGA-AR-A1AH-01 TCGA-AR-A1AJ-01 TCGA-E9-A1R2-01 TCGA-AR-A255-01 TCGA-AO-A0JD-01 TCGA-D8-A1JD-01 TCGA-AO-A1KQ-01 TCGA-B6-A0IE-01 TCGA-AQ-A04J-01 TCGA-E9-A1NA-01 TCGA-BH-A1EN-01 TCGA-BH-A1FN-01 TCGA-BH-A0DZ-01 TCGA-A8-A07B-01 TCGA-D8-A1J8-01 TCGA-AR-A24R-01 TCGA-E9-A3QA-01 TCGA-A7-A0CE-01 TCGA-LL-A6FR-01 TCGA-A2-A3XX-01 TCGA-A2-A0D4-01 TCGA-GM-A2DC-01 TCGA-AR-A24N-01 TCGA-E2-A1B0-01 TCGA-BH-A1EY-01…	(0.2075623877729963, 0.8703869922289394)	0.00143517	0.0399874	LumA	T	3.14e-59	404	0.63
DESMOND	optimized	TCGA-RNAseq	0.577072	3	473	0.859535	UP	YWHAZ CSE1L PGK1	TCGA-AR-A1AH-01 TCGA-EW-A2FW-01 TCGA-AR-A1AJ-01 TCGA-E9-A1QZ-01 TCGA-AR-A255-01 TCGA-AO-A0JD-01 TCGA-D8-A1JD-01 TCGA-AO-A1KQ-01 TCGA-B6-A0IE-01 TCGA-AR-A1AT-01 TCGA-AQ-A04J-01 TCGA-BH-A1EN-01 TCGA-BH-A1FN-01 TCGA-BH-A0DZ-01 TCGA-A8-A07B-01 TCGA-D8-A1J8-01 TCGA-E2-A15R-01 TCGA-A7-A0CE-01 TCGA-A2-A3XX-01 TCGA-A2-A0D4-01 TCGA-GM-A2DC-01 TCGA-AR-A24N-01 TCGA-E2-A1B0-01 TCGA-BH-A1EY-01 TCGA-AO-A03M-01…	(0.24376844879117077, 0.9103755355446473)	0.000690247	0.0306344	LumA	T	1.2e-55	395	0.61
DESMOND	optimized	TCGA-RNAseq	0.507787	3	410	0.858574	UP	BLM GTPBP4 PWP1	TCGA-AR-A1AH-01 TCGA-EW-A2FW-01 TCGA-AR-A1AJ-01 TCGA-E9-A1QZ-01 TCGA-AR-A255-01 TCGA-AO-A0JD-01 TCGA-D8-A1JD-01 TCGA-AO-A1KQ-01 TCGA-B6-A0IE-01 TCGA-AR-A1AT-01 TCGA-AQ-A04J-01 TCGA-BH-A1EN-01 TCGA-A8-A08R-01 TCGA-EW-A1PD-01 TCGA-D8-A1J8-01 TCGA-E9-A3QA-01 TCGA-A7-A0CE-01 TCGA-A2-A3XX-01 TCGA-A2-A0D4-01 TCGA-E2-A1B0-01 TCGA-EW-A1IW-01 TCGA-AO-A03M-01 TCGA-A2-A3XT-01 TCGA-A7-A4SE-01 TCGA-C8-A1HM-01…	(0.17614849821209105, 0.8394255022805268)	0.00269102	0.04775	LumA	T	5.84e-70	436	0.66
DESMOND	optimized	TCGA-RNAseq	0.585775	3	517	0.85828	UP	HSPD1 STIP1 PPA1	TCGA-OL-A66H-01 TCGA-AR-A1AH-01 TCGA-AC-A5EH-01 TCGA-AR-A1AJ-01 TCGA-E9-A1R2-01 TCGA-AR-A255-01 TCGA-AO-A1KQ-01 TCGA-AO-A0JD-01 TCGA-D8-A1JD-01 TCGA-E9-A5FL-01 TCGA-BH-A0GZ-01 TCGA-A7-A3RF-01 TCGA-B6-A0IE-01 TCGA-AR-A1AT-01 TCGA-AQ-A04J-01 TCGA-B6-A0RO-01 TCGA-AR-A1AQ-01 TCGA-BH-A1EN-01 TCGA-BH-A1FN-01 TCGA-BH-A0DZ-01 TCGA-C8-A12L-01 TCGA-A8-A07B-01 TCGA-E9-A3QA-01 TCGA-A7-A0CE-01 TCGA-A2-A3XX-01…	(0.24880880407242967, 0.9227414600310224)	0.000656427	0.0306344	LumA	T	1.37e-53	371	0.6
DESMOND	optimized	TCGA-RNAseq	0.498898	4	447	0.908248	UP	AARS CIAPIN1 ASNS GARS	TCGA-OL-A66H-01 TCGA-AR-A1AH-01 TCGA-AC-A5EH-01 TCGA-EW-A2FW-01 TCGA-AR-A1AJ-01 TCGA-AC-A62Y-01 TCGA-AO-A0JD-01 TCGA-AO-A1KQ-01 TCGA-A7-A3RF-01 TCGA-B6-A0IE-01 TCGA-E9-A1ND-01 TCGA-AQ-A04J-01 TCGA-B6-A0RO-01 TCGA-E9-A1NA-01 TCGA-BH-A1EN-01 TCGA-BH-A1FN-01 TCGA-E9-A3QA-01 TCGA-A7-A0CE-01 TCGA-A2-A3XX-01 TCGA-E2-A1B0-01 TCGA-AO-A03M-01 TCGA-A7-A4SE-01 TCGA-LL-A7SZ-01 TCGA-A1-A0SJ-01 TCGA-B6-A0IQ-01…	(0.16923977978855176, 0.8285566729902489)	0.00301535	0.049459	LumA	T	1.39e-53	406	0.62
DESMOND	optimized	TCGA-RNAseq	0.520698	4	459	0.887966	UP	RAN CDCA2 JMJD6 KPNA2	TCGA-3C-AALK-01 TCGA-AR-A1AH-01 TCGA-EW-A2FW-01 TCGA-AR-A1AJ-01 TCGA-AR-A255-01 TCGA-AO-A0JD-01 TCGA-AO-A1KQ-01 TCGA-AO-A128-01 TCGA-B6-A0IE-01 TCGA-AR-A1AT-01 TCGA-AQ-A04J-01 TCGA-E9-A1NA-01 TCGA-BH-A1FN-01 TCGA-BH-A0DZ-01 TCGA-EW-A1PD-01 TCGA-A8-A07B-01 TCGA-D8-A1J8-01 TCGA-E9-A3QA-01 TCGA-A7-A0CE-01 TCGA-LL-A6FR-01 TCGA-A2-A3XX-01 TCGA-A2-A0D4-01 TCGA-E2-A1B0-01 TCGA-EW-A1IW-01 TCGA-EW-A6S9-01…	(0.18829855719378713, 0.8530976336743215)	0.0021388	0.0441055	LumA	T	4.13e-79	424	0.68
DESMOND	optimized	TCGA-RNAseq	0.54659	4	426	0.879999	UP	YWHAZ DERL1 HIST1H4A RAD21	TCGA-BH-A0BL-01 TCGA-E9-A1QZ-01 TCGA-E9-A1R2-01 TCGA-AR-A255-01 TCGA-D8-A1JD-01 TCGA-AO-A1KQ-01 TCGA-AN-A0XL-01 TCGA-B6-A0IE-01 TCGA-AQ-A04J-01 TCGA-BH-A1EN-01 TCGA-BH-A1FN-01 TCGA-BH-A0DZ-01 TCGA-EW-A1PD-01 TCGA-A8-A07B-01 TCGA-E2-A15R-01 TCGA-E9-A3QA-01 TCGA-A2-A3XX-01 TCGA-A2-A0D4-01 TCGA-GM-A2DC-01 TCGA-AR-A24N-01 TCGA-E2-A1B0-01 TCGA-BH-A1EY-01 TCGA-AO-A03M-01 TCGA-A2-A3XT-01 TCGA-LL-A7SZ-01…	(0.21644329835527898, 0.8767373897321543)	0.00117488	0.0389753	LumA	T	4.29e-38	397	0.58
DESMOND	optimized	TCGA-RNAseq	0.589212	4	353	0.877071	UP	GTPBP4 POP1 RPL8 DKC1	TCGA-AR-A1AH-01 TCGA-AR-A1AJ-01 TCGA-AO-A0JD-01 TCGA-D8-A1JD-01 TCGA-A8-A08L-01 TCGA-B6-A0IE-01 TCGA-AR-A1AT-01 TCGA-AQ-A04J-01 TCGA-BH-A1FN-01 TCGA-EW-A1PD-01 TCGA-A8-A07B-01 TCGA-E9-A3QA-01 TCGA-A7-A0CE-01 TCGA-A2-A3XX-01 TCGA-A2-A0D4-01 TCGA-E2-A1B0-01 TCGA-A2-A3XT-01 TCGA-A7-A4SE-01 TCGA-LL-A7SZ-01 TCGA-B6-A0IQ-01 TCGA-AR-A0TS-01 TCGA-AN-A0G0-01 TCGA-BH-A18R-01 TCGA-A2-A0CM-01 TCGA-AN-A04C-01…	(0.25588893954875486, 0.9225341954755721)	0.000530998	0.0306344	LumA	T	1.85e-71	462	0.66
DESMOND	optimized	TCGA-RNAseq	0.537985	4	472	0.875157	UP	USP10 MSH2 FANCA FANCB	TCGA-AR-A1AH-01 TCGA-EW-A2FW-01 TCGA-AR-A1AJ-01 TCGA-AR-A255-01 TCGA-AO-A0JD-01 TCGA-D8-A1JD-01 TCGA-D8-A1XA-01 TCGA-AO-A1KQ-01 TCGA-AO-A128-01 TCGA-B6-A0IE-01 TCGA-E9-A1ND-01 TCGA-AQ-A04J-01 TCGA-E9-A1NA-01 TCGA-BH-A1FN-01 TCGA-EW-A1PD-01 TCGA-D8-A1J8-01 TCGA-E2-A15R-01 TCGA-E9-A3QA-01 TCGA-A7-A0CE-01 TCGA-A2-A3XX-01 TCGA-A2-A0D4-01 TCGA-AR-A24N-01 TCGA-E2-A1B0-01 TCGA-AO-A03M-01 TCGA-A2-A3XT-01…	(0.20544814369446546, 0.8705222648162998)	0.00151983	0.0399874	LumA	T	4.55e-73	414	0.66
DESMOND	optimized	TCGA-RNAseq	0.6485	4	432	0.85977	UP	TCP1 HDAC2 ACTL6A RFWD3	TCGA-AR-A1AH-01 TCGA-EW-A2FW-01 TCGA-AR-A1AJ-01 TCGA-AO-A0JD-01 TCGA-E9-A5FL-01 TCGA-A2-A04V-01 TCGA-B6-A0IE-01 TCGA-AQ-A04J-01 TCGA-BH-A1FN-01 TCGA-BH-A0DZ-01 TCGA-EW-A1PD-01 TCGA-A8-A07B-01 TCGA-D8-A1J8-01 TCGA-E9-A3QA-01 TCGA-A7-A0CE-01 TCGA-A2-A3XX-01 TCGA-A2-A0D4-01 TCGA-E2-A1B0-01 TCGA-EW-A1IW-01 TCGA-AQ-A0Y5-01 TCGA-AO-A03M-01 TCGA-A2-A3XT-01 TCGA-A7-A4SE-01 TCGA-A1-A0SJ-01 TCGA-C8-A1HM-01…	(0.3154756026976885, 0.981524345346655)	0.000135277	0.0177086	LumA	T	8.47e-60	418	0.63
DESMOND	optimized	TCGA-RNAseq	-0.540663	5	460	0.880442	UP	PSMB8 PSME2 PSMC5 PSMB9 PSME1	TCGA-OL-A66H-01 TCGA-3C-AALK-01 TCGA-AR-A1AJ-01 TCGA-AC-A62Y-01 TCGA-E9-A1QZ-01 TCGA-E9-A1R2-01 TCGA-E9-A3X8-01 TCGA-AR-A255-01 TCGA-AO-A0JD-01 TCGA-EW-A2FS-01 TCGA-AO-A1KQ-01 TCGA-A8-A0A6-01 TCGA-A7-A3IY-01 TCGA-GM-A2D9-01 TCGA-AR-A1AT-01 TCGA-AQ-A04J-01 TCGA-B6-A0RO-01 TCGA-E9-A1NA-01 TCGA-LD-A66U-01 TCGA-AO-A0J8-01 TCGA-BH-A0DZ-01 TCGA-E9-A1N5-01 TCGA-E9-A3QA-01 TCGA-A2-A0D4-01 TCGA-A2-A0YC-01…	(-0.8960628443952563, -0.18526293875369815)	0.00286696	0.0486108	LumA	T	4.18e-05	312	0.42
DESMOND	optimized	TCGA-RNAseq	-0.609409	5	493	0.858459	UP	PSMC2 PSME1 PSME2 PSMB9 PSMB8	TCGA-OL-A66H-01 TCGA-AR-A1AJ-01 TCGA-AC-A62Y-01 TCGA-E9-A1QZ-01 TCGA-E9-A1R2-01 TCGA-E9-A3X8-01 TCGA-AR-A255-01 TCGA-E2-A10B-01 TCGA-AO-A0JD-01 TCGA-EW-A2FS-01 TCGA-AO-A1KQ-01 TCGA-A8-A0A6-01 TCGA-A7-A3IY-01 TCGA-GM-A2D9-01 TCGA-AR-A1AT-01 TCGA-AQ-A04J-01 TCGA-B6-A0RO-01 TCGA-E9-A1NA-01 TCGA-LD-A66U-01 TCGA-AO-A0J8-01 TCGA-BH-A0DZ-01 TCGA-E2-A1L9-01 TCGA-E9-A1N5-01 TCGA-E9-A3QA-01 TCGA-A2-A0D4-01…	(-0.9560221010407991, -0.2627956057419526)	0.00056901	0.0306344	LumA	T	7.48e-06	300	0.42
DESMOND	optimized	TCGA-RNAseq	0.528872	6	406	0.915284	UP	MRPL13 MRPL15 TCEB1 COPS5 POP1 GGH	TCGA-AR-A1AH-01 TCGA-E9-A1R2-01 TCGA-E9-A3X8-01 TCGA-AR-A255-01 TCGA-AO-A0JD-01 TCGA-D8-A1JD-01 TCGA-AO-A1KQ-01 TCGA-B6-A0IE-01 TCGA-AQ-A04J-01 TCGA-BH-A1EN-01 TCGA-A8-A08R-01 TCGA-BH-A0DZ-01 TCGA-E2-A15R-01 TCGA-E9-A3QA-01 TCGA-A7-A0CE-01 TCGA-LL-A6FR-01 TCGA-A2-A3XX-01 TCGA-A2-A0D4-01 TCGA-GM-A2DC-01 TCGA-E2-A1B0-01 TCGA-A2-A3XT-01 TCGA-LL-A7SZ-01 TCGA-A1-A0SJ-01 TCGA-B6-A0IQ-01 TCGA-BH-A1FG-01…	(0.1990583279134145, 0.8586855259848528)	0.00167285	0.0416329	LumA	T	1.73e-48	419	0.61
DESMOND	optimized	TCGA-RNAseq	-0.657991	6	520	0.896604	DOWN	CCNB1 NCBP1 CCT5 AURKA TARS KPNA2	TCGA-OL-A66H-01 TCGA-3C-AALK-01 TCGA-E9-A1R0-01 TCGA-AC-A62Y-01 TCGA-E9-A1QZ-01 TCGA-E9-A3X8-01 TCGA-EW-A2FS-01 TCGA-D8-A1XA-01 TCGA-A8-A0A6-01 TCGA-A7-A3RF-01 TCGA-A7-A3IY-01 TCGA-GM-A2D9-01 TCGA-D8-A3Z5-01 TCGA-AN-A03X-01 TCGA-B6-A0RO-01 TCGA-LD-A66U-01 TCGA-AO-A0J8-01 TCGA-AO-A1KO-01 TCGA-E9-A1N5-01 TCGA-BH-A0EB-01 TCGA-A2-A0YC-01 TCGA-GM-A2DK-01 TCGA-GM-A2DC-01 TCGA-AR-A24N-01 TCGA-BH-A1EY-01…	(-1.003020857534549, -0.31296015078665024)	0.000185673	0.0177086	LumA	F	1.93e-87	383	0.67
DESMOND	optimized	TCGA-RNAseq	0.536894	6	496	0.866752	UP	NME1 PLK1 UBE2C AURKA PSMB7 PSMB5	TCGA-AR-A1AH-01 TCGA-AC-A5EH-01 TCGA-EW-A2FW-01 TCGA-AR-A1AJ-01 TCGA-E9-A1R2-01 TCGA-GM-A2DK-01 TCGA-AO-A0JD-01 TCGA-EW-A2FS-01 TCGA-E9-A5FL-01 TCGA-B6-A0IE-01 TCGA-AR-A1AT-01 TCGA-AQ-A04J-01 TCGA-E9-A1NA-01 TCGA-BH-A1FN-01 TCGA-BH-A0DZ-01 TCGA-EW-A1PD-01 TCGA-E9-A3QA-01 TCGA-A7-A0CE-01 TCGA-A2-A3XX-01 TCGA-A2-A0D4-01 TCGA-E9-A3X8-01 TCGA-E2-A1B0-01 TCGA-AO-A03M-01 TCGA-A2-A3XT-01 TCGA-A7-A4SE-01…	(0.20073420793041002, 0.8730542082535482)	0.00174607	0.0416329	LumA	T	4.15e-81	412	0.67
DESMOND	optimized	TCGA-RNAseq	0.634709	6	409	0.863692	UP	CEP55 GTPBP4 CDK2 RBM17 KIF11 RBM28	TCGA-AR-A1AH-01 TCGA-EW-A2FW-01 TCGA-AR-A1AJ-01 TCGA-AR-A255-01 TCGA-AO-A0JD-01 TCGA-D8-A1JD-01 TCGA-AO-A1KQ-01 TCGA-A2-A0SW-01 TCGA-B6-A0IE-01 TCGA-AR-A1AT-01 TCGA-AQ-A04J-01 TCGA-E9-A1NA-01 TCGA-BH-A1FN-01 TCGA-EW-A1PD-01 TCGA-A8-A07B-01 TCGA-E9-A3QA-01 TCGA-A7-A0CE-01 TCGA-A2-A3XX-01 TCGA-A2-A0D4-01 TCGA-AR-A24N-01 TCGA-EW-A1IW-01 TCGA-AO-A03M-01 TCGA-A2-A3XT-01 TCGA-A7-A4SE-01 TCGA-B6-A0IQ-01…	(0.3025504404427042, 0.9668665839973842)	0.000180234	0.0177086	LumA	T	1.05e-89	454	0.7
DESMOND	optimized	TCGA-RNAseq	-0.562229	7	491	0.877376	DOWN	YWHAZ PLK1 UBE2C TYMS AURKA PSMA4 PSMA5	TCGA-OL-A66H-01 TCGA-3C-AALK-01 TCGA-E9-A1R0-01 TCGA-AC-A62Y-01 TCGA-E9-A1R2-01 TCGA-E9-A3X8-01 TCGA-AR-A255-01 TCGA-E2-A10B-01 TCGA-D8-A1XA-01 TCGA-A8-A0A6-01 TCGA-A7-A3RF-01 TCGA-A7-A3IY-01 TCGA-GM-A2D9-01 TCGA-D8-A3Z5-01 TCGA-AN-A03X-01 TCGA-EW-A1P5-01 TCGA-B6-A0RO-01 TCGA-LD-A66U-01 TCGA-AO-A0J8-01 TCGA-AO-A1KO-01 TCGA-BH-A0EB-01 TCGA-A2-A0YC-01 TCGA-GM-A2DC-01 TCGA-BH-A1EY-01 TCGA-A2-A0CQ-01…	(-0.9090976991189739, -0.2153613000781372)	0.00148882	0.0399874	LumA	F	1e-101	382	0.69
DESMOND	optimized	TCGA-RNAseq	0.524613	7	467	0.87338	UP	KCMF1 KARS PSMD14 PSMD7 NUP93 EPRS CIAPIN1	TCGA-AR-A1AH-01 TCGA-EW-A2FW-01 TCGA-AR-A1AJ-01 TCGA-AC-A62Y-01 TCGA-E9-A1R2-01 TCGA-GM-A2DK-01 TCGA-AO-A0JD-01 TCGA-E9-A5FL-01 TCGA-AO-A128-01 TCGA-A7-A3IY-01 TCGA-B6-A0IE-01 TCGA-E9-A1ND-01 TCGA-AQ-A04J-01 TCGA-B6-A0RO-01 TCGA-AR-A1AQ-01 TCGA-BH-A1EN-01 TCGA-BH-A1FN-01 TCGA-D8-A1J8-01 TCGA-E9-A3QA-01 TCGA-A7-A0CE-01 TCGA-A2-A3XX-01 TCGA-A2-A0D4-01 TCGA-E2-A1B0-01 TCGA-AO-A03M-01 TCGA-LL-A7SZ-01…	(0.19336580746942572, 0.8558605540710675)	0.00190863	0.0428851	LumA	T	1.56e-62	404	0.63
DESMOND	optimized	TCGA-RNAseq	0.555358	7	527	0.858591	UP	GINS3 TPX2 RBPJ POP1 KPNA2 CSE1L KIF2C	TCGA-AR-A1AH-01 TCGA-EW-A2FW-01 TCGA-AR-A1AJ-01 TCGA-E9-A1QZ-01 TCGA-E9-A1R2-01 TCGA-AR-A255-01 TCGA-AO-A0JD-01 TCGA-D8-A1JD-01 TCGA-E9-A5FL-01 TCGA-B6-A0IE-01 TCGA-AR-A1AT-01 TCGA-AQ-A04J-01 TCGA-E9-A1NA-01 TCGA-BH-A1FN-01 TCGA-BH-A0DZ-01 TCGA-EW-A1PD-01 TCGA-BH-A18Q-01 TCGA-D8-A1J8-01 TCGA-AR-A24R-01 TCGA-E9-A3QA-01 TCGA-A7-A0CE-01 TCGA-A2-A3XX-01 TCGA-A2-A0D4-01 TCGA-A2-A0YH-01 TCGA-E2-A1B0-01…	(0.21658518871304555, 0.8941317762417119)	0.00131351	0.0399874	LumA	T	3e-98	408	0.7
DESMOND	optimized	TCGA-RNAseq	0.528036	10	466	0.859499	UP	STMN1 CDC20 HN1 IMPA2 KPNA2 UBE2S TBC1D7 CCT6A SHMT2 KIF2C	TCGA-3C-AALK-01 TCGA-AR-A1AH-01 TCGA-EW-A2FW-01 TCGA-AR-A1AJ-01 TCGA-E9-A3X8-01 TCGA-AO-A0JD-01 TCGA-D8-A1JD-01 TCGA-AO-A1KQ-01 TCGA-AO-A128-01 TCGA-A2-A0SW-01 TCGA-B6-A0IE-01 TCGA-AR-A1AT-01 TCGA-AQ-A04J-01 TCGA-E9-A1NA-01 TCGA-BH-A1FN-01 TCGA-BH-A0DZ-01 TCGA-EW-A1PD-01 TCGA-A8-A07B-01 TCGA-E9-A3QA-01 TCGA-A7-A0CE-01 TCGA-LL-A6FR-01 TCGA-A2-A3XX-01 TCGA-A2-A0D4-01 TCGA-E2-A1B0-01 TCGA-EW-A6S9-01…	(0.1936627490550098, 0.8624088709219841)	0.00196721	0.0428851	LumA	T	1.95e-84	428	0.69
DESMOND	optimized	TCGA-RNAseq	0.5819	11	471	0.862732	UP	NSUN2 TUBA1C SLC7A5 NCAPD2 CDC20 HSPD1 TPI1 MCM2 AURKB CCT5 AURKA	TCGA-AR-A1AH-01 TCGA-AC-A5EH-01 TCGA-EW-A2FW-01 TCGA-AR-A1AJ-01 TCGA-AO-A0JD-01 TCGA-D8-A1JD-01 TCGA-AO-A1KQ-01 TCGA-AO-A128-01 TCGA-B6-A0IE-01 TCGA-AR-A1AT-01 TCGA-AQ-A04J-01 TCGA-E9-A1NA-01 TCGA-BH-A1FN-01 TCGA-BH-A0DZ-01 TCGA-A8-A07B-01 TCGA-E9-A3QA-01 TCGA-A7-A0CE-01 TCGA-A2-A3XX-01 TCGA-A2-A0D4-01 TCGA-E2-A1B0-01 TCGA-EW-A1IW-01 TCGA-AO-A03M-01 TCGA-A2-A3XT-01 TCGA-A7-A4SE-01 TCGA-LL-A7SZ-01…	(0.24791250375573914, 0.9158872358566296)	0.000638269	0.0306344	LumA	T	1.8e-96	433	0.71
DESMOND	optimized	TCGA-RNAseq	0.648956	12	395	0.86725	UP	ABCF1 GTPBP4 RFC4 MCM7 MCM6 MCM4 MCM3 MCM2 CCT3 ILF2 EZH2 AURKA	TCGA-AR-A1AH-01 TCGA-EW-A2FW-01 TCGA-AR-A1AJ-01 TCGA-AO-A0JD-01 TCGA-D8-A1JD-01 TCGA-A8-A08L-01 TCGA-B6-A0IE-01 TCGA-AR-A1AT-01 TCGA-AQ-A04J-01 TCGA-BH-A1FN-01 TCGA-E2-A15R-01 TCGA-E9-A3QA-01 TCGA-A7-A0CE-01 TCGA-LL-A6FR-01 TCGA-A2-A3XX-01 TCGA-A2-A0D4-01 TCGA-E2-A1B0-01 TCGA-EW-A1IW-01 TCGA-AO-A03M-01 TCGA-A2-A3XT-01 TCGA-A7-A4SE-01 TCGA-LL-A7SZ-01 TCGA-D8-A1X5-01 TCGA-B6-A0IQ-01 TCGA-BH-A0BC-01…	(0.31815286874122345, 0.9797587009695261)	0.000120563	0.0177086	LumA	T	2.41e-97	464	0.72
DESMOND	optimized	TCGA-RNAseq	-0.536527	12	497	0.862342	DOWN	CCNB1 LMNB1 CCNA2 FXR1 PLK1 ZWINT HNRNPA1 TUBA1C FEN1 AURKA AURKB PSMB7	TCGA-OL-A66H-01 TCGA-3C-AALK-01 TCGA-E9-A1R0-01 TCGA-AC-A62Y-01 TCGA-E9-A1R2-01 TCGA-E9-A3X8-01 TCGA-D8-A1XA-01 TCGA-A8-A0A6-01 TCGA-A7-A3RF-01 TCGA-A7-A3IY-01 TCGA-GM-A2D9-01 TCGA-D8-A3Z5-01 TCGA-AN-A03X-01 TCGA-B6-A0RO-01 TCGA-LD-A66U-01 TCGA-AO-A0J8-01 TCGA-AO-A1KO-01 TCGA-BH-A0EB-01 TCGA-A2-A0YC-01 TCGA-GM-A2DK-01 TCGA-GM-A2DC-01 TCGA-BH-A1EY-01 TCGA-A2-A0CQ-01 TCGA-AC-A8OS-01 TCGA-GM-A2DN-01…	(-0.8783776637861389, -0.1946758829244753)	0.00209716	0.0441055	LumA	F	1.04e-91	376	0.67
DESMOND	optimized	TCGA-RNAseq	0.511962	12	436	0.860679	UP	PCNA CDC6 NASP RFC4 RFC3 MCM7 MCM6 MCM5 MCM4 MCM3 MCM2 ASF1B	TCGA-AR-A1AH-01 TCGA-EW-A2FW-01 TCGA-AR-A1AJ-01 TCGA-E9-A1QZ-01 TCGA-AO-A0JD-01 TCGA-D8-A1JD-01 TCGA-AO-A1KQ-01 TCGA-AO-A128-01 TCGA-B6-A0IE-01 TCGA-AR-A1AT-01 TCGA-AQ-A04J-01 TCGA-BH-A1FN-01 TCGA-BH-A0DZ-01 TCGA-EW-A1PD-01 TCGA-E2-A15R-01 TCGA-E9-A3QA-01 TCGA-A7-A0CE-01 TCGA-LL-A6FR-01 TCGA-A2-A3XX-01 TCGA-A2-A0D4-01 TCGA-AR-A24N-01 TCGA-E2-A1B0-01 TCGA-EW-A1IW-01 TCGA-GM-A2DN-01 TCGA-AO-A03M-01…	(0.18037076135779284, 0.8435523683705933)	0.00247732	0.0471594	LumA	T	5.84e-80	436	0.68
DESMOND	optimized	TCGA-RNAseq	0.698851	13	485	0.858693	UP	DNMT3B SKP2 RRM2 CCNE1 SMC4 CENPA POP1 FOXM1 AURKA TARS SMARCA5 KIF2C CHEK1	TCGA-AR-A1AH-01 TCGA-AC-A5EH-01 TCGA-EW-A2FW-01 TCGA-AR-A1AJ-01 TCGA-AR-A255-01 TCGA-AO-A0JD-01 TCGA-D8-A1JD-01 TCGA-AO-A1KQ-01 TCGA-AO-A128-01 TCGA-B6-A0IE-01 TCGA-AR-A1AT-01 TCGA-AQ-A04J-01 TCGA-E9-A1NA-01 TCGA-BH-A1FN-01 TCGA-BH-A0DZ-01 TCGA-EW-A1PD-01 TCGA-A8-A07B-01 TCGA-D8-A1J8-01 TCGA-E2-A15R-01 TCGA-E9-A3QA-01 TCGA-A7-A0CE-01 TCGA-A2-A3XX-01 TCGA-A2-A0D4-01 TCGA-E2-A1B0-01 TCGA-EW-A1IW-01…	(0.3612053976194973, 1.036496472812728)	4.97735e-05	0.0177086	LumA	T	1.23e-118	444	0.76
DESMOND	optimized	TCGA-RNAseq	0.53333	19	536	0.863557	UP	PCNA HELLS CCNB1 WDR4 E2F3 OIP5 RAD54B LRP8 SLC4A1AP MCM4 ATAD2 MCM6 MCM10 MCM2 RAD51 CHAF1B UBE2T ASF1B CHEK1	TCGA-AR-A1AH-01 TCGA-AC-A5EH-01 TCGA-EW-A2FW-01 TCGA-AR-A1AJ-01 TCGA-E9-A1QZ-01 TCGA-AO-A0JI-01 TCGA-AO-A0JD-01 TCGA-D8-A1JD-01 TCGA-E9-A5FL-01 TCGA-B6-A0IE-01 TCGA-AR-A1AT-01 TCGA-AQ-A04J-01 TCGA-E9-A1NA-01 TCGA-A8-A08R-01 TCGA-BH-A0DZ-01 TCGA-EW-A1PD-01 TCGA-E9-A1N5-01 TCGA-BH-A18Q-01 TCGA-D8-A1J8-01 TCGA-E2-A15R-01 TCGA-E9-A3QA-01 TCGA-A7-A0CE-01 TCGA-LL-A6FR-01 TCGA-A2-A3XX-01 TCGA-A2-A0D4-01…	(0.19572921767368895, 0.8709305434868322)	0.00195963	0.0428851	LumA	T	1.61e-94	403	0.69
DESMOND	optimized	TCGA-RNAseq	-0.551018	35	491	0.85863	DOWN	PLK1 CEP55 PLK4 GTF3C3 KIF15 RRM2 FANCD2 MYBL2 KIF2A KIF2C CDC7 TTK STIL CENPH SMC4 KIF4A FANCG FANCB FANCA DNMT3B HELLS BRCA2 CENPJ NUF2 SCLT1 BLM KIF14 LMNB1 LIN9 KIF23 CDK2 KPNA4 RAD51 NCAPH UBE2T	TCGA-OL-A66H-01 TCGA-3C-AALK-01 TCGA-E9-A1R0-01 TCGA-AC-A62Y-01 TCGA-E9-A1R2-01 TCGA-E9-A3X8-01 TCGA-D8-A1XA-01 TCGA-A8-A0A6-01 TCGA-A7-A3RF-01 TCGA-A7-A3IY-01 TCGA-B6-A0IE-01 TCGA-GM-A2D9-01 TCGA-D8-A3Z5-01 TCGA-AN-A03X-01 TCGA-EW-A1P5-01 TCGA-B6-A0RO-01 TCGA-LD-A66U-01 TCGA-AO-A0J8-01 TCGA-AO-A1KO-01 TCGA-BH-A0EB-01 TCGA-A2-A0YC-01 TCGA-GM-A2DK-01 TCGA-GM-A2DC-01 TCGA-BH-A1EY-01 TCGA-A2-A0CQ-01…	(-0.8958017384632642, -0.20623466557411851)	0.00173425	0.0416329	LumA	F	8.85e-91	373	0.67
DESMOND	optimized	TCGA-RNAseq	-0.529382	39	499	0.859452	DOWN	PLK1 BIRC5 CEP55 FOXM1 THAP11 NDC80 TPX2 RAD54B PSMA1 AURKA FANCA CDCA5 CDCA8 MTMR4 MORF4L2 SMC1A INCENP STAMBP BUB1 HEATR3 NUF2 GSG2 CENPE NCAPH KIF18A CENPA BLM MCM6 TRIP13 CCNB1 LIN9 GTSE1 H2AFZ KPNA2 AURKB STK38 TCF19 PSMD7 CKAP5	TCGA-OL-A66H-01 TCGA-3C-AALK-01 TCGA-AC-A5EH-01 TCGA-E9-A1R0-01 TCGA-AC-A62Y-01 TCGA-E9-A1R2-01 TCGA-E9-A3X8-01 TCGA-E2-A10B-01 TCGA-D8-A1XA-01 TCGA-A8-A0A6-01 TCGA-A7-A3RF-01 TCGA-A7-A3IY-01 TCGA-GM-A2D9-01 TCGA-D8-A3Z5-01 TCGA-AN-A03X-01 TCGA-EW-A1P5-01 TCGA-B6-A0RO-01 TCGA-LD-A66U-01 TCGA-AO-A0J8-01 TCGA-AO-A1KO-01 TCGA-BH-A0EB-01 TCGA-A2-A0YC-01 TCGA-GM-A2DK-01 TCGA-GM-A2DC-01 TCGA-BH-A1EY-01…	(-0.8733627570201214, -0.1854017645446912)	0.00255826	0.0471594	LumA	F	6.99e-100	384	0.69
DESMOND	optimized	TCGA-RNAseq	-0.554861	44	540	0.861302	DOWN	TMPO MTBP CLSPN PLK1 PSMD7 CEP55 AURKA PLK4 USP7 KIF14 KIF15 MCM10 FOXM1 RRM2 FANCD2 CDC7 TTK STIL SKP2 SMC2 FANCG FANCB FANCA MCM8 CHEK1 IARS CENPJ GSG2 CENPE BLM MCM6 MCM4 MCM2 CCNA2 SRPK1 TOP2A GMPS CEP152 XPOT KIF23 BRCA2 NCAPH AURKB TUBGCP3	TCGA-OL-A66H-01 TCGA-3C-AALK-01 TCGA-AC-A5EH-01 TCGA-E9-A1R0-01 TCGA-AC-A62Y-01 TCGA-E9-A1R2-01 TCGA-E9-A3X8-01 TCGA-D8-A73X-01 TCGA-EW-A2FS-01 TCGA-D8-A1XA-01 TCGA-E9-A5FL-01 TCGA-A8-A0A6-01 TCGA-A7-A3RF-01 TCGA-A7-A3IY-01 TCGA-B6-A0IE-01 TCGA-GM-A2D9-01 TCGA-D8-A3Z5-01 TCGA-AN-A03X-01 TCGA-EW-A1P5-01 TCGA-B6-A0RO-01 TCGA-LD-A66U-01 TCGA-AO-A0J8-01 TCGA-AO-A1KO-01 TCGA-BH-A0DZ-01 TCGA-BH-A0EB-01…	(-0.8933186542443028, -0.216402825287062)	0.001313	0.0399874	LumA	F	8.45e-93	398	0.69
DESMOND	optimized	TCGA-RNAseq	-0.516909	59	521	0.859102	DOWN	PLK1 HMGB2 BIRC5 HSPA8 PLK4 MSH6 CENPL FEN1 FBXO5 GMNN MYBL2 NDC80 OIP5 CDCA2 SKP2 RAD54B TYMS RAN TUBA1B TUBA1A UBE2T CKS1B TTK AURKA AURKB CDCA5 DBF4 CDCA8 ASF1B CHEK1 CENPN CENPM MCM10 CENPK DIAPH1 CDC25B CDC25A CENPA MCM6 MCM3 PKMYT1 CCNA2 SHMT2 CCNB1 LMNB1 E2F3 E2F2 E2F1 TUBB CKS2 CDC20 MELK EZH2 NCL H2AFZ RAD51 SMC3 CCNE2 MCM2	TCGA-OL-A66H-01 TCGA-3C-AALK-01 TCGA-E9-A1R0-01 TCGA-AC-A62Y-01 TCGA-E9-A1R2-01 TCGA-E9-A3X8-01 TCGA-AR-A255-01 TCGA-E2-A10B-01 TCGA-EW-A2FS-01 TCGA-D8-A1XA-01 TCGA-A8-A0A6-01 TCGA-A7-A3RF-01 TCGA-A7-A3IY-01 TCGA-GM-A2D9-01 TCGA-D8-A3Z5-01 TCGA-AN-A03X-01 TCGA-EW-A1P5-01 TCGA-B6-A0RO-01 TCGA-LD-A66U-01 TCGA-AO-A0J8-01 TCGA-AO-A1KO-01 TCGA-BH-A0EB-01 TCGA-A2-A0YC-01 TCGA-GM-A2DK-01 TCGA-GM-A2DC-01…	(-0.8556245447615007, -0.17819330205857192)	0.00278	0.0482077	LumA	F	5.28e-103	398	0.71
DESMOND	optimized	TCGA-RNAseq	-0.587422	87	480	0.858264	DOWN	PLK1 PKMYT1 KIF2C TPX2 ESPL1 RELA MAGOH OIP5 CENPO CENPN DIAPH1 NUF2 CENPA CDCA8 H2AFZ KIF22 KPNA2 PCMT1 FEN1 KIF23 NEK2 TUBA1C CCNE1 TTK TOP2A HMMR INCENP BUB1 CDC25C CDC25B CDC25A BLM TK1 ANAPC7 LMNB1 UBE2C TUBB CDC20 MELK STK38 UBE2S FOXM1 FBXO5 GMNN NDC80 CDC6 SKP2 ASPM CKS1B PTTG1 CKS2 CCNB1 SHCBP1 TACC3 TP73 CDK2 RAD51 CSE1L CSNK2B KIF20A MKI67 MAD2L1 BIRC5 CEP55 RRM2 PRC1 MYBL2 FAM83D CCNA…	TCGA-OL-A66H-01 TCGA-3C-AALK-01 TCGA-E9-A1R0-01 TCGA-AC-A62Y-01 TCGA-E9-A1R2-01 TCGA-GM-A2DK-01 TCGA-E2-A10B-01 TCGA-D8-A1XA-01 TCGA-A8-A0A6-01 TCGA-A7-A3RF-01 TCGA-A7-A3IY-01 TCGA-GM-A2D9-01 TCGA-D8-A3Z5-01 TCGA-AN-A03X-01 TCGA-EW-A1P5-01 TCGA-B6-A0RO-01 TCGA-LD-A66U-01 TCGA-AO-A0J8-01 TCGA-AO-A1KO-01 TCGA-BH-A0EB-01 TCGA-A2-A0YC-01 TCGA-E9-A3X8-01 TCGA-GM-A2DC-01 TCGA-BH-A1EY-01 TCGA-A2-A0CQ-01…	(-0.9346901394711872, -0.2401540371172427)	0.000915181	0.0349141	LumA	F	1.01e-102	377	0.69
DESMOND	optimized	TCGA-RNAseq	-0.599044	116	493	0.858227	DOWN	CCNE1 PLK1 PLK4 KIF2C TPX2 DYNLT1 ESPL1 WDR62 CDCA7 CENPO CENPN CENPM CENPI DIAPH3 CENPF CENPE CENPA CENPH CHFR UBE4B KIF23 SFN TERF1 DBF4 KPNA2 NCAPH TOP2A PCNA SLBP STMN1 DTL FEN1 H2AFZ NEK2 DDX52 EXO1 TTK CHEK2 MED30 CHEK1 HMMR BUB1 CDC25C CDC25A NCAPD2 BLM TK1 NUSAP1 PBK LMNB1 UBE2C ATAD2 MELK LIN54 UBE2T SMC4 FOXM1 FANCD2 GMNN CDC6 CDC7 SKP2 RACGAP1 SMC2 MASTL CKS1B FANCA BIRC5 RBL1 GSG2 SHC…	TCGA-OL-A66H-01 TCGA-3C-AALK-01 TCGA-E9-A1R0-01 TCGA-AC-A62Y-01 TCGA-E9-A1R2-01 TCGA-GM-A2DK-01 TCGA-E2-A10B-01 TCGA-D8-A1XA-01 TCGA-A8-A0A6-01 TCGA-A7-A3RF-01 TCGA-A7-A3IY-01 TCGA-GM-A2D9-01 TCGA-D8-A3Z5-01 TCGA-AN-A03X-01 TCGA-EW-A1P5-01 TCGA-B6-A0RO-01 TCGA-LD-A66U-01 TCGA-AO-A0J8-01 TCGA-AO-A1KO-01 TCGA-BH-A0EB-01 TCGA-A2-A0YC-01 TCGA-E9-A3X8-01 TCGA-GM-A2DC-01 TCGA-BH-A1EY-01 TCGA-A2-A0CQ-01…	(-0.9463281829617504, -0.25176002087024363)	0.000722699	0.0306344	LumA	F	1.59e-103	384	0.7
DESMOND	optimized	TCGA-RNAseq	-0.534021	132	482	0.858341	DOWN	CCNE1 LRPPRC PLK1 PLK4 KIF2C LTBR TPX2 CENPO CCDC77 BRCA2 VRK1 CENPH CENPE SPAG5 CENPA KIFC1 GTSE1 KIF23 DBF4 KPNA2 NCAPH TROAP SPC25 STMN1 ELAVL1 CLSPN ZWINT FEN1 H2AFZ NEK2 CCNE2 EXO1 TIMELESS CCT5 TTK CHEK2 CHEK1 HMMR INCENP BUB1 CDC25C CDC25B CDC25A BLM HIST1H2BG TK1 TOPBP1 GINS3 GINS1 CEP170 UBE2C TUBB ATAD2 HIST1H3A UBE2T RFC4 RFC3 RFC2 KIF14 FOXM1 KIF11 FANCD2 KIAA0101 NDC80 CBX2 CDC6 CDC7…	TCGA-OL-A66H-01 TCGA-3C-AALK-01 TCGA-E9-A1R0-01 TCGA-AC-A62Y-01 TCGA-E9-A1R2-01 TCGA-E9-A3X8-01 TCGA-D8-A73X-01 TCGA-EW-A2FS-01 TCGA-D8-A1XA-01 TCGA-A8-A0A6-01 TCGA-A7-A3RF-01 TCGA-A7-A3IY-01 TCGA-GM-A2D9-01 TCGA-D8-A3Z5-01 TCGA-AN-A03X-01 TCGA-EW-A1P5-01 TCGA-B6-A0RO-01 TCGA-LD-A66U-01 TCGA-AO-A0J8-01 TCGA-AO-A1KO-01 TCGA-BH-A0EB-01 TCGA-A2-A0YC-01 TCGA-GM-A2DK-01 TCGA-GM-A2DC-01 TCGA-BH-A1EY-01…	(-0.8815270836840507, -0.18651569521220784)	0.00259593	0.0471594	LumA	F	1.37e-100	376	0.68
DESMOND	optimized	METABRIC	0.32313	3	240	1.02159	UP	WWTR1 VGLL1 TEAD4	MB-4649 MB-4769 MB-5482 MB-6100 MB-6101 MB-4978 MB-5135 MB-5335 MB-0869 MB-0396 MB-4974 MB-5138 MB-3063 MB-4332 MB-7025 MB-5565 MB-7023 MB-7020 MB-5566 MB-7090 MB-0467 MB-2754 MB-4643 MB-4731 MB-2957 MB-0314 MB-7165 MB-6178 MB-4715 MB-4717 MB-4880 MB-7207 MB-3297 MB-7205 MB-3292 MB-2632 MB-3211 MB-3058 MB-3057 MB-5148 MB-3218 MB-0129 MB-0479 MB-4679 MB-3453 MB-2742 MB-5572 MB-6188 MB-0249 MB-0639…	(0.1041930219815975, 0.5420661284538412)	0.00381921	0.0213682	Basal	F	6.65e-85	133	0.43
DESMOND	optimized	METABRIC	0.215133	3	670	0.952434	UP	AARS WARS STAT1	MB-5483 MB-5481 MB-2833 MB-5130 MB-5645 MB-5138 MB-5139 MB-0468 MB-0542 MB-0462 MB-5035 MB-6358 MB-0465 MB-7104 MB-0238 MB-0235 MB-0230 MB-4417 MB-4965 MB-6272 MB-4846 MB-3525 MB-3528 MB-6187 MB-6184 MB-6182 MB-4328 MB-5236 MB-6188 MB-7258 MB-6007 MB-6001 MB-0152 MB-0150 MB-0157 MB-0658 MB-5463 MB-4993 MB-5502 MB-0656 MB-5468 MB-0652 MB-0653 MB-7260 MB-6077 MB-4254 MB-6308 MB-0590 MB-0594 MB-4770…	(0.06732664991382295, 0.36294004487734766)	0.00433445	0.0236522	LumA	T	4.36e-63	600	0.46
DESMOND	optimized	METABRIC	0.201071	3	705	0.912418	UP	E2F2 RBL1 ATAD2	MB-5482 MB-5483 MB-5481 MB-5486 MB-5485 MB-5135 MB-5130 MB-0396 MB-5641 MB-5138 MB-0545 MB-0469 MB-0541 MB-0542 MB-0462 MB-5035 MB-6358 MB-0467 MB-0466 MB-0465 MB-0464 MB-7104 MB-0238 MB-0236 MB-0232 MB-0230 MB-6179 MB-6178 MB-6272 MB-4846 MB-2932 MB-6184 MB-6182 MB-6183 MB-6181 MB-2742 MB-6188 MB-6189 MB-3092 MB-3165 MB-6008 MB-0152 MB-5260 MB-0150 MB-5266 MB-7031 MB-0095 MB-5465 MB-4998 MB-0658…	(0.05704837837713864, 0.3450938430064454)	0.00621308	0.0319323	LumA	T	7.64e-80	609	0.48
DESMOND	optimized	METABRIC	0.228074	3	688	0.909893	UP	ICT1 MRPL12 SLC25A10	MB-0268 MB-7219 MB-7218 MB-5485 MB-5135 MB-5646 MB-5647 MB-5641 MB-5139 MB-0544 MB-0545 MB-0469 MB-0541 MB-5039 MB-5033 MB-0466 MB-0464 MB-7107 MB-7100 MB-0238 MB-5228 MB-0234 MB-0232 MB-0230 MB-6179 MB-4849 MB-6272 MB-4969 MB-3526 MB-3525 MB-3528 MB-4418 MB-5547 MB-6184 MB-4323 MB-4324 MB-6183 MB-2742 MB-5236 MB-2745 MB-6188 MB-3167 MB-3165 MB-0526 MB-6008 MB-5260 MB-5266 MB-0097 MB-4999 MB-4998…	(0.084222417663611, 0.3719248748993821)	0.00188684	0.0122536	LumA	T	7.28e-34	553	0.41
DESMOND	optimized	METABRIC	0.225568	3	915	0.906498	UP	PLOD1 COL4A2 COL4A1	MB-5547 MB-7215 MB-7217 MB-5482 MB-5481 MB-5486 MB-5485 MB-5134 MB-5135 MB-5646 MB-5138 MB-0545 MB-6359 MB-6358 MB-5033 MB-6297 MB-0465 MB-0464 MB-7106 MB-0575 MB-0231 MB-4966 MB-4967 MB-6179 MB-6178 MB-6271 MB-6272 MB-6273 MB-4845 MB-6171 MB-4846 MB-4843 MB-7291 MB-4882 MB-2749 MB-6183 MB-4329 MB-6189 MB-4881 MB-4888 MB-6007 MB-6006 MB-3167 MB-3165 MB-7140 MB-4673 MB-0152 MB-5260 MB-5261 MB-0157…	(0.08585758357551984, 0.36527775638616977)	0.0015538	0.010731	Basal	F	7.4e-20	156	0.16
DESMOND	optimized	METABRIC	0.216278	3	535	0.904503	UP	SKP2 SNRPA1 SF3B3	MB-5482 MB-5135 MB-5642 MB-0540 MB-5039 MB-0462 MB-6358 MB-0467 MB-0464 MB-7100 MB-0238 MB-0236 MB-7109 MB-0230 MB-4881 MB-6178 MB-6272 MB-0149 MB-3525 MB-3528 MB-6184 MB-4324 MB-5236 MB-6188 MB-4888 MB-3165 MB-0150 MB-5266 MB-3046 MB-7144 MB-5465 MB-0658 MB-0659 MB-0656 MB-5468 MB-0653 MB-4395 MB-6077 MB-4254 MB-0593 MB-4770 MB-0385 MB-0381 MB-7267 MB-2922 MB-2923 MB-7078 MB-7071 MB-7070 MB-2517…	(0.05531224782157748, 0.37724302618095273)	0.00845191	0.0415083	Basal	F	8.78e-90	183	0.33
DESMOND	optimized	METABRIC	0.29755	3	729	0.900315	UP	HSF1 PLK1 CDC20	MB-0268 MB-5482 MB-5485 MB-5135 MB-5641 MB-5138 MB-5139 MB-0545 MB-0469 MB-0541 MB-0542 MB-0462 MB-0467 MB-0466 MB-0465 MB-0464 MB-0238 MB-0236 MB-7109 MB-0230 MB-5231 MB-6179 MB-6178 MB-6272 MB-0149 MB-3526 MB-3525 MB-3528 MB-6184 MB-4324 MB-5236 MB-6188 MB-6189 MB-3165 MB-7269 MB-5102 MB-0152 MB-5260 MB-0150 MB-5266 MB-7031 MB-7144 MB-5465 MB-0658 MB-4993 MB-5502 MB-0656 MB-5468 MB-0652 MB-4994…	(0.1536107199881165, 0.44148946423910973)	5.08645e-05	0.000977483	LumA	T	1.85e-105	627	0.51
DESMOND	optimized	METABRIC	0.297204	3	491	0.899357	UP	PSAT1 PITPNB TALDO1	MB-5482 MB-5483 MB-5135 MB-5641 MB-5138 MB-0462 MB-0465 MB-0464 MB-7104 MB-0238 MB-7102 MB-0230 MB-6178 MB-6272 MB-2742 MB-5236 MB-6188 MB-4888 MB-3165 MB-0152 MB-0150 MB-0157 MB-7031 MB-3046 MB-5465 MB-0658 MB-0659 MB-4993 MB-5502 MB-0656 MB-5468 MB-0653 MB-4254 MB-0590 MB-0594 MB-4770 MB-0380 MB-0381 MB-7267 MB-0389 MB-2922 MB-5213 MB-7078 MB-2929 MB-5222 MB-7070 MB-7073 MB-0901 MB-5602 MB-7158…	(0.13601659938803148, 0.4583906550045197)	0.000301664	0.0028986	Basal	F	2.4e-88	177	0.35
DESMOND	optimized	METABRIC	0.237415	3	572	0.898705	UP	PSAT1 LYN KYNU	MB-5482 MB-5483 MB-5135 MB-5138 MB-0540 MB-0462 MB-0460 MB-0464 MB-7104 MB-0238 MB-0233 MB-0230 MB-6178 MB-6272 MB-6187 MB-6182 MB-6183 MB-2742 MB-5236 MB-6188 MB-4888 MB-0152 MB-0150 MB-0157 MB-0155 MB-3046 MB-5465 MB-0658 MB-0659 MB-4993 MB-5502 MB-0656 MB-5468 MB-0653 MB-4254 MB-0596 MB-0594 MB-4770 MB-0386 MB-0381 MB-7267 MB-0389 MB-2922 MB-5213 MB-7078 MB-2929 MB-2513 MB-7071 MB-7073 MB-0901…	(0.08355604752937079, 0.39127326079005653)	0.00249158	0.015086	LumA	T	1.03e-92	653	0.48
DESMOND	optimized	METABRIC	0.244368	3	708	0.893914	UP	HN1 STMN1 KPNA2	MB-5483 MB-5481 MB-5485 MB-5135 MB-5130 MB-5647 MB-5641 MB-5138 MB-5139 MB-0545 MB-0469 MB-3344 MB-0541 MB-0542 MB-5035 MB-6358 MB-0467 MB-0466 MB-0464 MB-0238 MB-7102 MB-0232 MB-0230 MB-5231 MB-6178 MB-4849 MB-6272 MB-4846 MB-3525 MB-3528 MB-2932 MB-6184 MB-6182 MB-6183 MB-2742 MB-5236 MB-2745 MB-6188 MB-2747 MB-7268 MB-0352 MB-3165 MB-5102 MB-0152 MB-5260 MB-0150 MB-7031 MB-0093 MB-0095 MB-5465…	(0.09818657605216474, 0.3905487711551963)	0.00105129	0.00829769	LumA	T	1.07e-89	618	0.49
DESMOND	optimized	METABRIC	0.212104	3	775	0.893452	DOWN	UBE3A AFTPH ESR1	MB-7215 MB-5482 MB-5483 MB-4925 MB-5135 MB-3085 MB-5138 MB-0545 MB-0540 MB-0542 MB-3429 MB-0462 MB-6358 MB-0467 MB-0466 MB-0465 MB-0464 MB-0124 MB-0238 MB-0236 MB-0235 MB-0230 MB-5231 MB-6178 MB-6272 MB-4880 MB-4846 MB-4843 MB-6187 MB-6184 MB-6182 MB-2742 MB-5236 MB-2744 MB-6188 MB-5238 MB-0352 MB-3165 MB-0152 MB-0150 MB-0157 MB-3049 MB-0155 MB-3046 MB-5465 MB-0658 MB-0659 MB-7254 MB-4993 MB-4992…	(0.06330690972208491, 0.3609013509005313)	0.00520853	0.0280753	Basal	F	3.18e-70	192	0.25
DESMOND	optimized	METABRIC	0.222768	3	851	0.892681	UP	CENPO CENPM CENPK	MB-5483 MB-5481 MB-5486 MB-5485 MB-5135 MB-5130 MB-5646 MB-5641 MB-5138 MB-0544 MB-0545 MB-0469 MB-0541 MB-0542 MB-5035 MB-6358 MB-6297 MB-0465 MB-0464 MB-0336 MB-7107 MB-0238 MB-7102 MB-7109 MB-0230 MB-0434 MB-4965 MB-4849 MB-6272 MB-4846 MB-3525 MB-2932 MB-6184 MB-6182 MB-6183 MB-5228 MB-2742 MB-5236 MB-2745 MB-6188 MB-6189 MB-7258 MB-4802 MB-6007 MB-6006 MB-3165 MB-7269 MB-6049 MB-5102 MB-0152…	(0.08171026940192733, 0.3638251183456534)	0.00196606	0.0122536	LumA	T	3.69e-93	581	0.5
DESMOND	optimized	METABRIC	0.199124	3	569	0.892012	UP	DDX58 IFIT3 IKBKE	MB-7219 MB-5483 MB-5645 MB-5646 MB-5138 MB-5139 MB-0468 MB-0542 MB-0462 MB-5035 MB-0460 MB-6297 MB-0464 MB-7104 MB-0238 MB-0239 MB-0235 MB-4965 MB-6272 MB-4846 MB-6184 MB-6182 MB-6183 MB-4328 MB-2742 MB-5236 MB-4888 MB-3165 MB-7269 MB-6008 MB-0150 MB-0157 MB-0093 MB-5502 MB-0657 MB-5468 MB-5505 MB-4254 MB-0203 MB-4250 MB-0590 MB-4771 MB-0598 MB-7123 MB-4785 MB-7079 MB-5039 MB-5211 MB-7075 MB-7076…	(0.04835657296410628, 0.34989238524492144)	0.00963688	0.0453138	LumA	T	2.19e-09	533	0.36
DESMOND	optimized	METABRIC	0.229691	3	903	0.891052	UP	RACGAP1 KIF23 CD2AP	MB-5482 MB-2613 MB-5481 MB-5486 MB-5485 MB-5135 MB-5130 MB-0396 MB-5641 MB-5138 MB-5139 MB-0545 MB-0469 MB-0542 MB-0462 MB-5035 MB-6358 MB-0467 MB-0466 MB-0336 MB-7107 MB-0238 MB-7102 MB-0236 MB-0234 MB-7109 MB-0230 MB-4966 MB-5231 MB-4965 MB-6272 MB-0149 MB-4846 MB-4968 MB-3525 MB-3528 MB-2932 MB-6184 MB-4323 MB-4324 MB-6183 MB-4328 MB-5228 MB-2742 MB-5236 MB-2745 MB-6188 MB-6189 MB-5433 MB-3092…	(0.08953687061944363, 0.3698447439478535)	0.00131778	0.00987214	LumA	T	3.7e-96	568	0.51
DESMOND	optimized	METABRIC	0.303487	3	697	0.88742	UP	ASNS GARS MARS	MB-5483 MB-5481 MB-5486 MB-5485 MB-5135 MB-2834 MB-5647 MB-5641 MB-5138 MB-0545 MB-0469 MB-0542 MB-6358 MB-0467 MB-0464 MB-0336 MB-7100 MB-0238 MB-7102 MB-0230 MB-5231 MB-6178 MB-6272 MB-4843 MB-4882 MB-3525 MB-3528 MB-6184 MB-4324 MB-2742 MB-5236 MB-6188 MB-4888 MB-6007 MB-3606 MB-0352 MB-3165 MB-0152 MB-0157 MB-3049 MB-0093 MB-3046 MB-0095 MB-5465 MB-4999 MB-0658 MB-5463 MB-4993 MB-5502 MB-0656…	(0.15981985451051262, 0.44715360565028606)	3.46861e-05	0.000735039	LumA	T	9.97e-63	592	0.46
DESMOND	optimized	METABRIC	0.305533	3	723	0.887099	UP	YWHAZ CDC25B CDCA7	MB-0268 MB-5482 MB-5483 MB-5486 MB-5485 MB-5135 MB-5130 MB-5647 MB-5138 MB-0469 MB-0540 MB-5039 MB-0462 MB-6358 MB-0467 MB-0464 MB-0336 MB-0238 MB-0236 MB-0230 MB-5231 MB-6178 MB-6272 MB-4846 MB-6184 MB-4323 MB-4324 MB-0455 MB-4328 MB-2742 MB-5236 MB-6188 MB-7284 MB-4888 MB-3165 MB-5102 MB-0150 MB-5266 MB-3046 MB-5465 MB-4998 MB-0658 MB-5463 MB-5502 MB-0656 MB-5468 MB-0653 MB-4395 MB-7260 MB-6077…	(0.16133535349433215, 0.4497303047582103)	3.28332e-05	0.000735039	LumA	T	9.79e-104	627	0.51
DESMOND	optimized	METABRIC	0.247878	3	721	0.886067	UP	MCM4 E2F3 ATAD2	MB-5482 MB-5483 MB-5481 MB-5486 MB-5485 MB-5135 MB-5641 MB-5138 MB-5139 MB-0469 MB-0542 MB-0462 MB-6359 MB-0465 MB-0464 MB-7104 MB-0238 MB-0236 MB-0232 MB-6179 MB-6178 MB-4849 MB-6272 MB-4846 MB-4969 MB-6184 MB-6182 MB-6183 MB-2742 MB-5236 MB-6188 MB-6189 MB-3092 MB-3165 MB-6008 MB-0152 MB-5260 MB-0150 MB-5266 MB-7031 MB-3046 MB-5465 MB-0658 MB-5463 MB-5502 MB-0656 MB-5468 MB-0653 MB-4395 MB-7260…	(0.10414067742068883, 0.3916147130725122)	0.000724854	0.00604501	LumA	T	3.73e-90	615	0.49
DESMOND	optimized	METABRIC	0.266049	3	624	0.884117	UP	ENO1 FBXO5 NUP205	MB-5482 MB-5481 MB-5486 MB-5485 MB-5135 MB-0397 MB-5130 MB-5138 MB-0469 MB-5039 MB-0462 MB-5035 MB-6358 MB-0464 MB-7104 MB-0238 MB-5228 MB-0236 MB-7109 MB-0230 MB-6178 MB-6272 MB-4846 MB-3528 MB-6184 MB-6182 MB-2742 MB-5236 MB-6188 MB-6189 MB-7268 MB-3165 MB-6049 MB-5102 MB-0152 MB-0150 MB-5266 MB-3046 MB-7144 MB-5465 MB-0658 MB-0659 MB-4993 MB-5502 MB-4991 MB-5468 MB-0653 MB-7260 MB-6077 MB-4254…	(0.11580402172967924, 0.4162936497298733)	0.000519213	0.00445053	LumA	T	4.27e-92	641	0.49
DESMOND	optimized	METABRIC	0.203466	3	745	0.883554	UP	BLM MCM2 PSMD3	MB-5482 MB-5483 MB-2613 MB-5485 MB-5135 MB-5641 MB-5642 MB-0469 MB-0541 MB-5039 MB-0462 MB-6358 MB-0467 MB-0465 MB-7104 MB-0238 MB-0236 MB-7109 MB-0230 MB-4417 MB-5231 MB-6179 MB-4849 MB-6272 MB-0149 MB-4846 MB-3528 MB-4418 MB-6184 MB-4323 MB-4324 MB-2742 MB-5236 MB-6188 MB-3092 MB-3167 MB-3165 MB-7269 MB-0526 MB-6008 MB-5260 MB-0150 MB-5266 MB-7031 MB-3046 MB-7144 MB-5465 MB-4998 MB-0658 MB-7254…	(0.060469320560534584, 0.3464616847242754)	0.00529068	0.0281745	LumA	T	1.16e-91	610	0.5
DESMOND	optimized	METABRIC	0.229503	3	755	0.880885	UP	MAPK1 DAPK1 IFI30	MB-7295 MB-5483 MB-5485 MB-5138 MB-0469 MB-0540 MB-0541 MB-0542 MB-0462 MB-5035 MB-0460 MB-6297 MB-0464 MB-7104 MB-0238 MB-0239 MB-0235 MB-7109 MB-0233 MB-4966 MB-5231 MB-6178 MB-6272 MB-4846 MB-4843 MB-5229 MB-3525 MB-3528 MB-2742 MB-5236 MB-6188 MB-6006 MB-6049 MB-0150 MB-0157 MB-0155 MB-0093 MB-3046 MB-5465 MB-0658 MB-5463 MB-4993 MB-5502 MB-0656 MB-5468 MB-0652 MB-0653 MB-6071 MB-4254 MB-6308…	(0.08629821738243348, 0.372708274855839)	0.00168327	0.0112728	LumA	T	3.17e-57	568	0.45
DESMOND	optimized	METABRIC	0.388501	3	688	0.877197	UP	ENO1 YARS GAPDH	MB-7295 MB-5482 MB-5484 MB-5135 MB-0397 MB-5647 MB-5641 MB-5138 MB-0542 MB-0463 MB-5035 MB-6358 MB-0467 MB-0465 MB-0464 MB-7104 MB-7100 MB-0238 MB-0236 MB-0230 MB-4967 MB-4965 MB-6272 MB-4882 MB-3525 MB-4418 MB-6184 MB-6182 MB-6183 MB-6181 MB-2742 MB-5236 MB-6188 MB-4888 MB-3165 MB-6049 MB-5102 MB-0152 MB-0150 MB-0157 MB-7031 MB-3046 MB-7144 MB-5464 MB-5465 MB-0658 MB-0659 MB-4993 MB-5502 MB-0656…	(0.24505274504180705, 0.531949293642304)	1.10731e-07	2.72478e-05	Basal	F	5.96e-62	179	0.25
DESMOND	optimized	METABRIC	0.278727	3	494	0.876329	UP	GTPBP4 POP1 RPP25	MB-5482 MB-5485 MB-5135 MB-5138 MB-6359 MB-0467 MB-7104 MB-0238 MB-0230 MB-5231 MB-6178 MB-6272 MB-6184 MB-6182 MB-6188 MB-5102 MB-0152 MB-5260 MB-5266 MB-3046 MB-7144 MB-5465 MB-0658 MB-5463 MB-5502 MB-0656 MB-5468 MB-4395 MB-4254 MB-0593 MB-0590 MB-3978 MB-4770 MB-0385 MB-0381 MB-2922 MB-2923 MB-5213 MB-5212 MB-7075 MB-7070 MB-2517 MB-4171 MB-4621 MB-5602 MB-6329 MB-5604 MB-4601 MB-7159 MB-7154…	(0.11589243014865977, 0.44156201408962736)	0.000793921	0.00649839	LumA	T	4.67e-80	659	0.46
DESMOND	optimized	METABRIC	0.312765	3	947	0.874333	UP	COL4A2 COL4A1 MMP9	MB-7215 MB-7217 MB-5482 MB-5483 MB-5481 MB-5486 MB-5485 MB-5134 MB-5135 MB-5183 MB-5646 MB-5138 MB-5139 MB-0545 MB-0184 MB-0462 MB-6359 MB-0460 MB-5033 MB-6297 MB-0465 MB-0464 MB-7104 MB-0238 MB-0358 MB-0231 MB-4966 MB-4967 MB-6179 MB-6178 MB-6272 MB-4845 MB-6171 MB-4846 MB-4843 MB-5232 MB-2749 MB-4328 MB-4329 MB-2742 MB-6246 MB-2747 MB-4881 MB-5226 MB-5238 MB-6006 MB-3167 MB-6001 MB-0152 MB-5260…	(0.17266609264945892, 0.45286338843646584)	1.21131e-05	0.000537677	claudin-low	F	1.8e-16	154	0.16
DESMOND	optimized	METABRIC	0.339085	3	735	0.872727	DOWN	BBS1 TTC8 LZTFL1	MB-5483 MB-5135 MB-5138 MB-0468 MB-0540 MB-0542 MB-0462 MB-6359 MB-6358 MB-0467 MB-0465 MB-0464 MB-7104 MB-0238 MB-0239 MB-0236 MB-0230 MB-4417 MB-5231 MB-6179 MB-6178 MB-6272 MB-3526 MB-3528 MB-4324 MB-2742 MB-5236 MB-6188 MB-4888 MB-6007 MB-6006 MB-3165 MB-0152 MB-0150 MB-0157 MB-0093 MB-3046 MB-5465 MB-0658 MB-5463 MB-4993 MB-5502 MB-0656 MB-0657 MB-5468 MB-0652 MB-4395 MB-4254 MB-0590 MB-7253…	(0.19541955049278076, 0.48274964305558904)	3.72807e-06	0.000329561	LumA	T	5.9e-92	613	0.5
DESMOND	optimized	METABRIC	0.260904	3	952	0.872517	UP	RACGAP1 PLK4 PCNT	MB-5482 MB-5483 MB-2613 MB-5481 MB-5486 MB-5485 MB-5135 MB-5641 MB-5138 MB-5139 MB-0545 MB-0469 MB-0541 MB-0542 MB-0462 MB-5035 MB-6358 MB-0466 MB-0464 MB-0336 MB-7107 MB-0238 MB-0236 MB-0234 MB-7109 MB-0233 MB-0230 MB-4966 MB-5231 MB-4965 MB-4849 MB-6272 MB-4961 MB-0149 MB-4846 MB-4968 MB-3525 MB-3528 MB-2932 MB-6184 MB-4324 MB-6183 MB-4328 MB-2742 MB-5236 MB-2745 MB-6188 MB-6189 MB-4797 MB-7258…	(0.12017176125613585, 0.40163591053029635)	0.000279509	0.0027454	LumA	T	1.05e-103	560	0.52
DESMOND	optimized	METABRIC	0.313702	3	612	0.871618	UP	ENO1 SHMT2 MRPL37	MB-5482 MB-5135 MB-5641 MB-5138 MB-0542 MB-6358 MB-0465 MB-0464 MB-7104 MB-7100 MB-0238 MB-7109 MB-0230 MB-4967 MB-6178 MB-6272 MB-0149 MB-3525 MB-4418 MB-6184 MB-6182 MB-6183 MB-5236 MB-6188 MB-4888 MB-3165 MB-5102 MB-0152 MB-5261 MB-0157 MB-3046 MB-7144 MB-5465 MB-0658 MB-0659 MB-4993 MB-4992 MB-0656 MB-5468 MB-0653 MB-4395 MB-6077 MB-4254 MB-4250 MB-7250 MB-0590 MB-4770 MB-0385 MB-0381 MB-4787…	(0.16513488317406533, 0.4622691649533497)	3.49588e-05	0.000735039	Basal	F	3.12e-73	180	0.29
DESMOND	optimized	METABRIC	0.199181	3	850	0.86871	UP	RPL6 RPL29 RPS15A	MB-7295 MB-5482 MB-5483 MB-5481 MB-5486 MB-5485 MB-5135 MB-3085 MB-5647 MB-5641 MB-5138 MB-5139 MB-0545 MB-0469 MB-0541 MB-0542 MB-0463 MB-0462 MB-5035 MB-6358 MB-6297 MB-0465 MB-0464 MB-0336 MB-7100 MB-0238 MB-0239 MB-0236 MB-0234 MB-0235 MB-0232 MB-0230 MB-3328 MB-6179 MB-6178 MB-6272 MB-4843 MB-3525 MB-3378 MB-3528 MB-6184 MB-6182 MB-6183 MB-2742 MB-2744 MB-2745 MB-6188 MB-2747 MB-0872 MB-6006…	(0.05599088234490149, 0.34237116992560546)	0.00640374	0.032534	LumA	T	9.91e-18	465	0.37
DESMOND	optimized	METABRIC	0.192759	3	767	0.868216	UP	RPL6 RPS24 RPS21	MB-7295 MB-5482 MB-5483 MB-5481 MB-5486 MB-5485 MB-5135 MB-5646 MB-5647 MB-5641 MB-5138 MB-0545 MB-0469 MB-0542 MB-5035 MB-6358 MB-6297 MB-0465 MB-0464 MB-0336 MB-7100 MB-0238 MB-0239 MB-0236 MB-0232 MB-0230 MB-3328 MB-6178 MB-6272 MB-3526 MB-3525 MB-3528 MB-2749 MB-6184 MB-6182 MB-6183 MB-2742 MB-2744 MB-2745 MB-6188 MB-6006 MB-3165 MB-6049 MB-5102 MB-0152 MB-5260 MB-0150 MB-5266 MB-5267 MB-0093…	(0.04837457485252808, 0.3371425761753841)	0.00888019	0.0426635	LumA	T	3.18e-25	511	0.39
DESMOND	optimized	METABRIC	0.253816	3	780	0.865992	UP	CSE1L MCM2 MARS	MB-5547 MB-5482 MB-5481 MB-5486 MB-5485 MB-5135 MB-5130 MB-5646 MB-5647 MB-5641 MB-5138 MB-0545 MB-0469 MB-0468 MB-3341 MB-6358 MB-0464 MB-0336 MB-7107 MB-7100 MB-0238 MB-7102 MB-7109 MB-0230 MB-5231 MB-6178 MB-6271 MB-4961 MB-0149 MB-4846 MB-4843 MB-3525 MB-4418 MB-0200 MB-6184 MB-4323 MB-4324 MB-5228 MB-2742 MB-5236 MB-6188 MB-7258 MB-6007 MB-3167 MB-3165 MB-3355 MB-6049 MB-6008 MB-5260 MB-0150…	(0.11184980116589674, 0.395783056487098)	0.000458083	0.00404945	LumA	T	7.29e-73	580	0.47
DESMOND	optimized	METABRIC	0.280306	3	603	0.862289	UP	ZC3H3 MRPS25 ZNF707	MB-5482 MB-5483 MB-5481 MB-5486 MB-5484 MB-5485 MB-5135 MB-5646 MB-5647 MB-5641 MB-5138 MB-5139 MB-0469 MB-5039 MB-4798 MB-6359 MB-5033 MB-0466 MB-0464 MB-0238 MB-4141 MB-6179 MB-6178 MB-4849 MB-6273 MB-4846 MB-3526 MB-3528 MB-4418 MB-6184 MB-4324 MB-6188 MB-6007 MB-3167 MB-6001 MB-6008 MB-5260 MB-5266 MB-5267 MB-5264 MB-0658 MB-5463 MB-5468 MB-0652 MB-0653 MB-4395 MB-7260 MB-6077 MB-6075 MB-4254…	(0.1344947815099499, 0.4261172315542493)	0.000164683	0.00184172	Basal	F	2.49e-14	113	0.16
DESMOND	optimized	METABRIC	0.280173	3	644	0.862212	UP	RPIA AURKA GMPS	MB-5482 MB-5481 MB-5485 MB-5135 MB-5646 MB-5138 MB-0469 MB-0542 MB-0462 MB-0467 MB-0464 MB-0336 MB-7107 MB-0238 MB-7102 MB-7109 MB-0230 MB-5231 MB-6178 MB-6272 MB-3525 MB-6184 MB-4324 MB-2742 MB-6188 MB-3165 MB-6049 MB-5102 MB-0152 MB-0150 MB-5266 MB-5267 MB-7144 MB-5465 MB-4998 MB-0658 MB-4993 MB-4991 MB-5468 MB-0653 MB-4395 MB-7260 MB-4254 MB-7250 MB-0590 MB-0598 MB-0380 MB-2922 MB-2923 MB-5213…	(0.13191398933727835, 0.42843286574007333)	0.000212357	0.00213322	LumA	T	5.46e-105	647	0.5
DESMOND	optimized	METABRIC	-0.314873	3	824	0.861313	UP	PCM1 BTRC FGD3	MB-5489 MB-7215 MB-7216 MB-7219 MB-7218 MB-5486 MB-5484 MB-5485 MB-5134 MB-7212 MB-5645 MB-5646 MB-5647 MB-5640 MB-5642 MB-5139 MB-0544 MB-3344 MB-0540 MB-0541 MB-3341 MB-4798 MB-0463 MB-5035 MB-0336 MB-7107 MB-7106 MB-7101 MB-7100 MB-7102 MB-0232 MB-4141 MB-4966 MB-4967 MB-6179 MB-4965 MB-4962 MB-6271 MB-4961 MB-4845 MB-6171 MB-4846 MB-4883 MB-4968 MB-4969 MB-2932 MB-4322 MB-6185 MB-6183 MB-6181…	(-0.4577295953414916, -0.17201732409618767)	1.56019e-05	0.000626911	LumA	F	5.46e-85	495	0.49
DESMOND	optimized	METABRIC	0.190794	3	763	0.860776	UP	OTUB1 USP21 MARK2	MB-5547 MB-7219 MB-3606 MB-5486 MB-5484 MB-5134 MB-5135 MB-5645 MB-5640 MB-5641 MB-5138 MB-0545 MB-0468 MB-0541 MB-5039 MB-4798 MB-6358 MB-0467 MB-7107 MB-7100 MB-0238 MB-4416 MB-0230 MB-4141 MB-5231 MB-6179 MB-4965 MB-4849 MB-6271 MB-4961 MB-4845 MB-4883 MB-4843 MB-4969 MB-4882 MB-3526 MB-3525 MB-4418 MB-6184 MB-4323 MB-4324 MB-6183 MB-6181 MB-5236 MB-2745 MB-6007 MB-3167 MB-3165 MB-6008 MB-5260…	(0.050145872675575326, 0.3314415641181444)	0.00784289	0.0393927	claudin-low	T	3.91e-19	175	0.15
DESMOND	optimized	METABRIC	0.493857	3	249	0.858916	UP	FLAD1 GRB7 PSPH	MB-4724 MB-4871 MB-3028 MB-5420 MB-6108 MB-4725 MB-4878 MB-5483 MB-6105 MB-4729 MB-6100 MB-3025 MB-3556 MB-5331 MB-5332 MB-3272 MB-2626 MB-0630 MB-5409 MB-7027 MB-2758 MB-4127 MB-7020 MB-0130 MB-7187 MB-6358 MB-0467 MB-0465 MB-4643 MB-6107 MB-0236 MB-0346 MB-0230 MB-4711 MB-5231 MB-7165 MB-0479 MB-7207 MB-4846 MB-4930 MB-6114 MB-2632 MB-5474 MB-5147 MB-3866 MB-0120 MB-6330 MB-4644 MB-6182 MB-3528…	(0.2895993875733219, 0.6981149178638111)	2.14959e-06	0.000316706	Her2	F	2.84e-66	128	0.38
DESMOND	optimized	METABRIC	0.28597	3	659	0.858134	UP	MCM2 PSMB2 PSMD2	MB-5482 MB-5481 MB-5486 MB-0147 MB-5485 MB-5135 MB-5646 MB-5647 MB-5641 MB-5642 MB-0469 MB-0468 MB-0541 MB-5039 MB-0462 MB-6358 MB-0467 MB-0465 MB-0464 MB-7104 MB-7100 MB-0238 MB-7109 MB-0230 MB-5231 MB-6179 MB-4965 MB-4962 MB-6271 MB-4846 MB-4969 MB-6184 MB-4323 MB-6182 MB-6183 MB-2742 MB-5236 MB-6188 MB-7141 MB-3165 MB-0152 MB-5260 MB-0150 MB-5266 MB-7031 MB-7144 MB-5465 MB-4998 MB-0658 MB-7254…	(0.14118799577667543, 0.4307527364135134)	0.00010827	0.00140751	LumA	T	1.01e-59	599	0.45
DESMOND	optimized	METABRIC	0.310043	3	778	0.857367	UP	CDC25C STIP1 CHEK1	MB-5482 MB-5483 MB-5481 MB-5486 MB-5485 MB-5135 MB-6048 MB-5646 MB-5641 MB-5138 MB-0468 MB-0541 MB-0542 MB-0462 MB-6358 MB-0465 MB-0464 MB-7104 MB-7107 MB-7100 MB-0238 MB-5228 MB-0236 MB-7109 MB-0230 MB-5231 MB-6179 MB-6178 MB-4849 MB-6272 MB-3525 MB-6184 MB-4324 MB-6183 MB-2742 MB-5236 MB-2745 MB-6188 MB-6007 MB-7268 MB-3165 MB-7269 MB-0526 MB-6008 MB-0152 MB-0151 MB-0150 MB-5266 MB-7031 MB-0095…	(0.16846023433021562, 0.45162608958139927)	1.77074e-05	0.000652222	LumA	T	3.89e-112	620	0.52
DESMOND	optimized	METABRIC	0.300587	3	804	0.857222	UP	ANLN AURKA MRPL16	MB-0392 MB-5482 MB-5481 MB-5486 MB-5485 MB-5135 MB-5646 MB-5641 MB-5138 MB-0545 MB-0469 MB-0542 MB-0462 MB-6358 MB-0336 MB-7107 MB-0238 MB-7102 MB-7109 MB-0230 MB-4966 MB-5231 MB-6178 MB-6272 MB-0149 MB-4846 MB-3525 MB-6184 MB-4324 MB-2742 MB-5236 MB-6188 MB-6189 MB-6007 MB-2901 MB-0352 MB-3165 MB-7269 MB-0526 MB-6049 MB-6008 MB-0152 MB-0150 MB-5266 MB-7031 MB-3046 MB-2629 MB-0095 MB-5465 MB-0658…	(0.1586106744159277, 0.44256277531834254)	3.33105e-05	0.000735039	LumA	T	2.61e-120	620	0.53
DESMOND	optimized	METABRIC	0.233904	3	914	0.855756	UP	PTPN23 CEP55 KIF20A	MB-0392 MB-5482 MB-5483 MB-2613 MB-5481 MB-5486 MB-5485 MB-5135 MB-2838 MB-5641 MB-5138 MB-0545 MB-0469 MB-5039 MB-0462 MB-5035 MB-6358 MB-0467 MB-0465 MB-0464 MB-0336 MB-7107 MB-0238 MB-7109 MB-0230 MB-4417 MB-4881 MB-6178 MB-4849 MB-6272 MB-6036 MB-4846 MB-7291 MB-3525 MB-6184 MB-4323 MB-4324 MB-6183 MB-2742 MB-4886 MB-6188 MB-6189 MB-6007 MB-5613 MB-2901 MB-3165 MB-7140 MB-4673 MB-6008 MB-0152…	(0.0928695068574065, 0.37493919228409756)	0.00115173	0.00893092	LumA	T	1.28e-112	581	0.53
DESMOND	optimized	METABRIC	0.255377	3	756	0.854064	UP	XRCC3 LIG1 CHTF18	MB-4849 MB-5482 MB-5481 MB-5486 MB-5484 MB-5485 MB-5135 MB-5130 MB-5646 MB-5647 MB-5641 MB-5642 MB-5139 MB-0545 MB-3341 MB-6358 MB-0466 MB-7219 MB-0238 MB-5228 MB-4416 MB-0234 MB-7109 MB-4417 MB-4966 MB-6179 MB-4962 MB-6271 MB-4961 MB-4846 MB-4969 MB-4418 MB-6184 MB-4323 MB-4324 MB-6183 MB-6181 MB-4328 MB-2745 MB-6188 MB-6189 MB-3092 MB-6007 MB-6006 MB-3167 MB-3165 MB-7269 MB-6008 MB-0152 MB-0150…	(0.11449638504287665, 0.39625813664709186)	0.000381065	0.00358363	LumA	T	2.07e-25	515	0.39
DESMOND	optimized	METABRIC	0.35997	3	533	0.8498	UP	SKP2 IMPDH1 GMPS	MB-5482 MB-5484 MB-5485 MB-5135 MB-5138 MB-0462 MB-6358 MB-0467 MB-0465 MB-0464 MB-7104 MB-7107 MB-0238 MB-0236 MB-7109 MB-0230 MB-4881 MB-6178 MB-6272 MB-0149 MB-4843 MB-3525 MB-6184 MB-2742 MB-5236 MB-6188 MB-3165 MB-6008 MB-5260 MB-5266 MB-3046 MB-7144 MB-5465 MB-0206 MB-4992 MB-0656 MB-5468 MB-0653 MB-4254 MB-0202 MB-0593 MB-4771 MB-4770 MB-5225 MB-0380 MB-0381 MB-7267 MB-2922 MB-2923 MB-5213…	(0.2028105893696352, 0.51712848983158)	7.14711e-06	0.000451289	Basal	F	5.5e-84	179	0.32
DESMOND	optimized	METABRIC	0.191827	3	659	0.84833	UP	DERL1 ZHX1 PSMD11	MB-5483 MB-5481 MB-5486 MB-5484 MB-5485 MB-5135 MB-5130 MB-5646 MB-5647 MB-5641 MB-5138 MB-0545 MB-0469 MB-0541 MB-0542 MB-0462 MB-6359 MB-0467 MB-0466 MB-0464 MB-7104 MB-0238 MB-0236 MB-0230 MB-6178 MB-3526 MB-3528 MB-2932 MB-6184 MB-6182 MB-2742 MB-6188 MB-6189 MB-3092 MB-0582 MB-6001 MB-6008 MB-0151 MB-0150 MB-5266 MB-3046 MB-7144 MB-0658 MB-5463 MB-5502 MB-4991 MB-5468 MB-0653 MB-7260 MB-6071…	(0.04617491276391983, 0.33747821222402086)	0.0098424	0.0457931	LumA	T	1.14e-44	579	0.43
DESMOND	optimized	METABRIC	0.343678	3	650	0.847347	UP	PLK1 MRPL55 TOMM40	MB-0268 MB-5482 MB-5483 MB-5486 MB-5484 MB-5485 MB-5135 MB-5646 MB-5641 MB-5138 MB-0541 MB-0542 MB-0462 MB-0467 MB-0466 MB-0336 MB-0238 MB-7109 MB-4417 MB-5231 MB-6179 MB-6178 MB-6272 MB-3526 MB-3525 MB-3528 MB-6184 MB-4323 MB-4324 MB-6188 MB-6189 MB-6007 MB-7269 MB-5102 MB-0152 MB-5260 MB-5266 MB-7031 MB-3046 MB-7144 MB-5465 MB-0658 MB-5463 MB-5502 MB-4991 MB-5468 MB-0653 MB-4395 MB-7260 MB-6077…	(0.19885504770836052, 0.4885000517973247)	3.3004e-06	0.000329561	LumA	T	8.94e-70	613	0.46
DESMOND	optimized	METABRIC	0.237074	3	675	0.847001	UP	GYS1 KHSRP GSK3B	MB-5482 MB-5484 MB-5485 MB-5130 MB-5646 MB-5138 MB-0468 MB-5039 MB-4798 MB-6358 MB-0465 MB-7104 MB-7107 MB-7100 MB-0238 MB-7102 MB-4416 MB-0232 MB-0230 MB-4417 MB-4967 MB-6179 MB-6178 MB-6272 MB-4961 MB-4969 MB-3525 MB-3528 MB-4418 MB-4322 MB-4323 MB-4324 MB-6183 MB-6181 MB-5236 MB-6188 MB-6007 MB-3167 MB-3165 MB-7269 MB-0152 MB-5260 MB-5266 MB-5267 MB-3046 MB-0097 MB-0095 MB-4999 MB-4998 MB-4557…	(0.09337417969551165, 0.38077391431066215)	0.00122274	0.00931814	Her2	F	6.15e-28	155	0.21
DESMOND	optimized	METABRIC	0.29744	3	744	0.845073	UP	ATXN3 CREB1 GSK3B	MB-5489 MB-7215 MB-7217 MB-5482 MB-5486 MB-5484 MB-5485 MB-5134 MB-5138 MB-5139 MB-0468 MB-0540 MB-5039 MB-4798 MB-0462 MB-6359 MB-6358 MB-0465 MB-7104 MB-7107 MB-7106 MB-7100 MB-5228 MB-0236 MB-4416 MB-7109 MB-0230 MB-4417 MB-4967 MB-6179 MB-4965 MB-4849 MB-6272 MB-4961 MB-4845 MB-4846 MB-4968 MB-4969 MB-4882 MB-4418 MB-6187 MB-6184 MB-4323 MB-4324 MB-5236 MB-4888 MB-6007 MB-6001 MB-7269 MB-6008…	(0.1562178958269919, 0.43866223120224856)	3.65857e-05	0.000735039	Her2	F	6.56e-15	141	0.17
DESMOND	optimized	METABRIC	0.202013	3	766	0.844639	UP	GGH KPNA2 MCM2	MB-5482 MB-5485 MB-5135 MB-5647 MB-5641 MB-5138 MB-5139 MB-0545 MB-0469 MB-0468 MB-0541 MB-0542 MB-0463 MB-0462 MB-5035 MB-0467 MB-0466 MB-0465 MB-0464 MB-0336 MB-0238 MB-0236 MB-7109 MB-0230 MB-5231 MB-6178 MB-4849 MB-6272 MB-4846 MB-4969 MB-3525 MB-3528 MB-2932 MB-6184 MB-6182 MB-2742 MB-2745 MB-6188 MB-3165 MB-6049 MB-5102 MB-0152 MB-5260 MB-0150 MB-5266 MB-7031 MB-3046 MB-0095 MB-5465 MB-0658…	(0.058582641132885666, 0.34544246326645955)	0.00577141	0.0300113	LumA	T	1.88e-92	605	0.5
DESMOND	optimized	METABRIC	0.215828	3	746	0.844218	DOWN	EFCAB6 MYB SIN3A	MB-5482 MB-5483 MB-5485 MB-5647 MB-5138 MB-0469 MB-0540 MB-3429 MB-0462 MB-6359 MB-6358 MB-0467 MB-0464 MB-7104 MB-0238 MB-0230 MB-5231 MB-6178 MB-6272 MB-4843 MB-3528 MB-2742 MB-5236 MB-6188 MB-3165 MB-0152 MB-0150 MB-0157 MB-0093 MB-3046 MB-5465 MB-0658 MB-4993 MB-0656 MB-0657 MB-5468 MB-0652 MB-0653 MB-7256 MB-4254 MB-7251 MB-0593 MB-0590 MB-0594 MB-0598 MB-0386 MB-0384 MB-0383 MB-0380 MB-0381…	(0.07086470247411716, 0.36079143952893034)	0.0035219	0.0199574	LumA	T	3.75e-80	598	0.48
DESMOND	optimized	METABRIC	0.277811	3	682	0.840406	UP	NUTF2 EIF4EBP1 SHMT2	MB-5482 MB-5483 MB-5481 MB-5485 MB-5135 MB-5130 MB-5646 MB-5647 MB-5641 MB-5138 MB-0545 MB-0469 MB-0468 MB-5039 MB-6359 MB-0464 MB-0336 MB-7100 MB-0238 MB-7102 MB-0230 MB-4417 MB-5231 MB-6178 MB-3525 MB-6329 MB-4418 MB-6184 MB-4323 MB-4324 MB-2742 MB-5236 MB-6188 MB-4888 MB-6007 MB-3606 MB-3165 MB-0152 MB-0151 MB-5266 MB-7031 MB-3046 MB-7144 MB-5465 MB-0658 MB-4993 MB-5502 MB-4991 MB-5468 MB-0653…	(0.1331824435244678, 0.4224389953589531)	0.000166671	0.00184172	LumA	T	3.17e-71	606	0.47
DESMOND	optimized	METABRIC	0.187213	3	763	0.839665	UP	MCM5 MCM2 PRDX1	MB-4849 MB-5482 MB-2613 MB-5485 MB-5135 MB-5646 MB-5647 MB-5641 MB-5642 MB-5139 MB-0545 MB-0469 MB-0541 MB-5039 MB-0462 MB-6359 MB-6358 MB-0464 MB-7104 MB-7100 MB-0238 MB-7109 MB-0230 MB-5231 MB-6179 MB-4965 MB-4962 MB-6271 MB-6272 MB-0149 MB-4846 MB-4968 MB-4969 MB-3525 MB-4418 MB-6184 MB-4323 MB-4324 MB-6183 MB-4328 MB-5236 MB-6188 MB-6189 MB-5433 MB-7258 MB-3165 MB-6008 MB-0152 MB-0150 MB-5266…	(0.045702767756732265, 0.32872375390634057)	0.00951534	0.0452235	LumA	T	7.29e-73	585	0.47
DESMOND	optimized	METABRIC	-0.193092	3	929	0.838961	UP	RPL5 RPL18A RPS2	MB-5489 MB-7215 MB-7217 MB-5482 MB-3606 MB-5484 MB-5134 MB-5135 MB-0397 MB-5130 MB-5641 MB-5138 MB-5139 MB-0545 MB-3344 MB-0540 MB-3341 MB-3429 MB-0463 MB-5035 MB-0466 MB-0464 MB-7104 MB-7100 MB-0238 MB-7102 MB-0236 MB-0575 MB-0232 MB-0507 MB-4966 MB-4849 MB-6036 MB-6171 MB-4843 MB-4969 MB-3525 MB-3528 MB-6187 MB-4322 MB-4323 MB-6182 MB-6181 MB-2744 MB-2745 MB-6188 MB-5571 MB-5238 MB-5364 MB-6007…	(-0.33580454053839337, -0.05037958220059857)	0.00800498	0.0397551	LumB	T	0.00176	265	0.23
DESMOND	optimized	METABRIC	0.417612	4	276	1.05526	UP	ERBB2 PTK2 SUPT6H GRB7	MB-4724 MB-4871 MB-3028 MB-5420 MB-6108 MB-4723 MB-4878 MB-5483 MB-6105 MB-4729 MB-6100 MB-3025 MB-3556 MB-5331 MB-5332 MB-3272 MB-2626 MB-5327 MB-5408 MB-5409 MB-3104 MB-7027 MB-4331 MB-2758 MB-4127 MB-7020 MB-0130 MB-7187 MB-6358 MB-0467 MB-6297 MB-0465 MB-4001 MB-4643 MB-3357 MB-6217 MB-6107 MB-0236 MB-0346 MB-0230 MB-4711 MB-0434 MB-0479 MB-7207 MB-4846 MB-2632 MB-7050 MB-5147 MB-3866 MB-0120…	(0.22183193432740106, 0.6133917998977332)	2.90567e-05	0.000735039	Her2	F	1.93e-68	136	0.38
DESMOND	optimized	METABRIC	0.325582	4	557	0.977377	UP	DDX21 S100A9 CCNYL1 S100A8	MB-5482 MB-0397 MB-5138 MB-0469 MB-0542 MB-0462 MB-0460 MB-0467 MB-6297 MB-0465 MB-0464 MB-7104 MB-0238 MB-0236 MB-0233 MB-0230 MB-4967 MB-6178 MB-4843 MB-3525 MB-3528 MB-6182 MB-2742 MB-6188 MB-3165 MB-0152 MB-0150 MB-0157 MB-7031 MB-0155 MB-0658 MB-4993 MB-0656 MB-0657 MB-5468 MB-0652 MB-0653 MB-4254 MB-4250 MB-0593 MB-0598 MB-5225 MB-0386 MB-0382 MB-0381 MB-5215 MB-5213 MB-5212 MB-2929 MB-2513…	(0.17278411138007294, 0.4783794026570068)	2.96291e-05	0.000735039	LumA	T	9.02e-49	613	0.43
DESMOND	optimized	METABRIC	0.309499	4	554	0.930505	UP	S100A9 TUBB SMTNL2 S100A8	MB-5482 MB-0397 MB-5138 MB-0542 MB-0462 MB-0467 MB-6297 MB-0465 MB-7104 MB-0238 MB-0236 MB-0230 MB-4967 MB-6178 MB-4843 MB-6182 MB-2742 MB-6188 MB-3165 MB-0152 MB-0150 MB-5266 MB-7031 MB-0155 MB-4998 MB-0658 MB-4993 MB-0656 MB-0657 MB-5468 MB-0653 MB-4254 MB-4250 MB-0593 MB-0590 MB-0598 MB-5225 MB-0386 MB-0382 MB-0381 MB-5215 MB-5213 MB-5212 MB-2929 MB-2513 MB-7070 MB-7073 MB-7258 MB-0451 MB-0901…	(0.15504027484495764, 0.4639573802350373)	8.59014e-05	0.00130926	LumA	T	5.29e-40	602	0.42
DESMOND	optimized	METABRIC	0.241535	4	556	0.921868	UP	MCM5 S100A9 S100A8 NF2	MB-5482 MB-0397 MB-5138 MB-0542 MB-0462 MB-6297 MB-0465 MB-7104 MB-0238 MB-0236 MB-0230 MB-4967 MB-6178 MB-4843 MB-3528 MB-6182 MB-2742 MB-6188 MB-4888 MB-3165 MB-0152 MB-0150 MB-5266 MB-7031 MB-0155 MB-5465 MB-0658 MB-4993 MB-0656 MB-0657 MB-5468 MB-0653 MB-4254 MB-4250 MB-0593 MB-4686 MB-0590 MB-0598 MB-5225 MB-0386 MB-0382 MB-0381 MB-2922 MB-5213 MB-7078 MB-2929 MB-2513 MB-2517 MB-7258 MB-0451…	(0.0887591501280604, 0.39431086357545775)	0.001944	0.0122536	LumA	T	3.04e-43	606	0.43
DESMOND	optimized	METABRIC	0.271346	4	568	0.912133	UP	TUBA1A S100A9 S100A8 PPIA	MB-5482 MB-0397 MB-5647 MB-5138 MB-0542 MB-0462 MB-0467 MB-6297 MB-0465 MB-7104 MB-0238 MB-0236 MB-0233 MB-0230 MB-4967 MB-6178 MB-4843 MB-3528 MB-6182 MB-2742 MB-6188 MB-3165 MB-0152 MB-0150 MB-7031 MB-0155 MB-0093 MB-0658 MB-4993 MB-0656 MB-5468 MB-0653 MB-4254 MB-4250 MB-0593 MB-0597 MB-0598 MB-5225 MB-0386 MB-0382 MB-0383 MB-0381 MB-5392 MB-0452 MB-5215 MB-5213 MB-5212 MB-2929 MB-2513 MB-7073…	(0.11800999720607733, 0.42468159314064946)	0.000523591	0.00445053	LumA	T	1.36e-36	593	0.42
DESMOND	optimized	METABRIC	0.243038	4	706	0.90437	UP	CENPN CENPM CENPL CENPI	MB-5482 MB-5483 MB-5486 MB-5485 MB-5135 MB-5130 MB-5138 MB-5139 MB-0545 MB-0469 MB-0542 MB-0462 MB-6358 MB-0467 MB-0466 MB-0465 MB-0464 MB-7104 MB-7107 MB-7100 MB-0238 MB-7109 MB-0230 MB-6178 MB-6272 MB-4846 MB-6184 MB-4324 MB-6183 MB-2742 MB-5236 MB-6188 MB-7258 MB-6007 MB-7268 MB-3165 MB-7269 MB-5102 MB-0152 MB-0150 MB-5266 MB-7031 MB-0093 MB-0095 MB-5465 MB-4998 MB-0658 MB-4993 MB-5502 MB-0656…	(0.09769875102242304, 0.3883775373303104)	0.00104741	0.00829769	LumA	T	2.62e-109	636	0.51
DESMOND	optimized	METABRIC	0.201966	4	742	0.862714	UP	BLM RAD51 RAD54B FANCD2	MB-5482 MB-5481 MB-5486 MB-5485 MB-5135 MB-5138 MB-5139 MB-0469 MB-0541 MB-5039 MB-0462 MB-6358 MB-0464 MB-0336 MB-7107 MB-0238 MB-7109 MB-0230 MB-5231 MB-6272 MB-4846 MB-3525 MB-3528 MB-6184 MB-6182 MB-2742 MB-5236 MB-2745 MB-6188 MB-6189 MB-3165 MB-7269 MB-6049 MB-6008 MB-0152 MB-5260 MB-0150 MB-5266 MB-7031 MB-3046 MB-0095 MB-5465 MB-4998 MB-0658 MB-5463 MB-5502 MB-0656 MB-5468 MB-4994 MB-4395…	(0.058737667652871944, 0.345193814413287)	0.00571425	0.0300113	LumA	T	3.93e-98	617	0.5
DESMOND	optimized	METABRIC	0.364386	4	431	0.860632	UP	CCNE1 SKP2 CKS1B RRM2	MB-5482 MB-5485 MB-5135 MB-5138 MB-0462 MB-6358 MB-0467 MB-0464 MB-7104 MB-0238 MB-7109 MB-0230 MB-6178 MB-6272 MB-4846 MB-6184 MB-2742 MB-6188 MB-3165 MB-0152 MB-0150 MB-0157 MB-3046 MB-5465 MB-0658 MB-0656 MB-5468 MB-0653 MB-4254 MB-0202 MB-4770 MB-0383 MB-0380 MB-0381 MB-2922 MB-5213 MB-7078 MB-3824 MB-7075 MB-7071 MB-7073 MB-5602 MB-7090 MB-7154 MB-7155 MB-7151 MB-5070 MB-3466 MB-0149 MB-5173…	(0.19238711623734434, 0.5363856950985637)	3.29221e-05	0.000735039	Basal	F	5.53e-97	175	0.38
DESMOND	optimized	METABRIC	0.289552	4	821	0.854804	UP	PSRC1 RNASEH2A AURKA SHMT2	MB-5482 MB-2613 MB-5481 MB-5485 MB-5135 MB-5130 MB-5641 MB-5138 MB-0545 MB-0469 MB-0541 MB-0542 MB-0462 MB-5035 MB-6358 MB-0465 MB-0464 MB-7104 MB-0238 MB-7109 MB-0230 MB-4417 MB-5231 MB-6179 MB-4965 MB-6272 MB-0149 MB-4846 MB-3525 MB-4418 MB-6184 MB-4324 MB-6183 MB-2742 MB-5236 MB-6188 MB-6189 MB-4888 MB-6007 MB-3606 MB-3165 MB-7269 MB-3355 MB-6008 MB-0152 MB-5260 MB-0150 MB-5266 MB-7144 MB-5465…	(0.1481961476788202, 0.43090857885705336)	5.95047e-05	0.00101547	LumA	T	1.98e-105	602	0.52
DESMOND	optimized	METABRIC	0.224344	4	753	0.851756	UP	KIF14 TTK CNTROB FANCD2	MB-5482 MB-5483 MB-2613 MB-5486 MB-5484 MB-5485 MB-5135 MB-5138 MB-5139 MB-0469 MB-5039 MB-0462 MB-5035 MB-6358 MB-0467 MB-0464 MB-7107 MB-0238 MB-0236 MB-7109 MB-4417 MB-5231 MB-6178 MB-4849 MB-6272 MB-4591 MB-0149 MB-4846 MB-3525 MB-4418 MB-6184 MB-4323 MB-4324 MB-6183 MB-2742 MB-5236 MB-2745 MB-6188 MB-6189 MB-4888 MB-4802 MB-6007 MB-3165 MB-7269 MB-6049 MB-6008 MB-0150 MB-5266 MB-3046 MB-7144…	(0.08227279898518777, 0.3664159559896687)	0.00196835	0.0122536	LumA	T	4.34e-98	614	0.5
DESMOND	optimized	METABRIC	0.291493	4	751	0.845939	UP	SRC STIP1 CDC25A MCM2	MB-7216 MB-5482 MB-5481 MB-5486 MB-0147 MB-5485 MB-5135 MB-5646 MB-5641 MB-0545 MB-0468 MB-0541 MB-5039 MB-0462 MB-6358 MB-0466 MB-0465 MB-0464 MB-7104 MB-7107 MB-7100 MB-0238 MB-7109 MB-0230 MB-4417 MB-5231 MB-6179 MB-6178 MB-4849 MB-6272 MB-4846 MB-4969 MB-3525 MB-4418 MB-6184 MB-4323 MB-4324 MB-6183 MB-2742 MB-5236 MB-6188 MB-7258 MB-6007 MB-3606 MB-3167 MB-3165 MB-3355 MB-6008 MB-0152 MB-5260…	(0.1491572598137697, 0.433828534026786)	5.97333e-05	0.00101547	LumA	T	1.06e-78	595	0.48
DESMOND	optimized	METABRIC	0.216751	5	869	0.853737	UP	PRC1 EZH2 TRIM37 PBK MCM10	MB-5482 MB-5483 MB-5481 MB-5485 MB-5135 MB-5641 MB-5138 MB-0469 MB-5520 MB-0542 MB-0462 MB-5035 MB-6358 MB-0467 MB-0464 MB-0336 MB-7107 MB-0238 MB-0234 MB-7109 MB-0230 MB-4966 MB-5231 MB-6178 MB-4849 MB-6272 MB-0149 MB-4846 MB-3525 MB-6184 MB-4324 MB-6183 MB-2742 MB-5236 MB-2745 MB-6188 MB-6189 MB-7258 MB-4802 MB-7268 MB-3165 MB-7269 MB-0526 MB-6049 MB-5102 MB-0152 MB-0151 MB-0150 MB-5266 MB-7031…	(0.07650152380434497, 0.3569998656471014)	0.00245314	0.0150595	LumA	T	1.17e-120	602	0.54
DESMOND	optimized	METABRIC	0.215003	5	801	0.848369	UP	MCM2 CKAP5 RPS16 AURKB AURKA	MB-5482 MB-2613 MB-5481 MB-5486 MB-5485 MB-5135 MB-0396 MB-5641 MB-5138 MB-0545 MB-0469 MB-0541 MB-5039 MB-0462 MB-6358 MB-0466 MB-0464 MB-0336 MB-7107 MB-0238 MB-7109 MB-0230 MB-5231 MB-6179 MB-6178 MB-4849 MB-6272 MB-0149 MB-4846 MB-3525 MB-6184 MB-4324 MB-6183 MB-2742 MB-5236 MB-6188 MB-6189 MB-7258 MB-3167 MB-3165 MB-7269 MB-3355 MB-5102 MB-5260 MB-0150 MB-5266 MB-7031 MB-3046 MB-7144 MB-5465…	(0.07332840340326724, 0.3566776341338746)	0.00293554	0.0170725	LumA	T	5.87e-108	610	0.52
DESMOND	optimized	METABRIC	0.276521	5	831	0.847528	UP	IRS4 NME1 MCM2 AURKB AURKA	MB-5482 MB-5483 MB-5481 MB-5485 MB-5135 MB-5646 MB-5641 MB-5138 MB-5139 MB-0545 MB-0469 MB-0541 MB-0542 MB-0462 MB-6358 MB-0466 MB-0465 MB-0464 MB-0336 MB-0238 MB-7109 MB-0230 MB-4417 MB-5231 MB-6179 MB-6178 MB-6272 MB-0149 MB-4846 MB-3525 MB-2932 MB-6184 MB-4323 MB-4324 MB-6183 MB-2742 MB-5236 MB-6188 MB-6189 MB-3167 MB-3165 MB-7269 MB-0526 MB-4982 MB-6008 MB-0152 MB-5260 MB-0150 MB-5266 MB-7031…	(0.1352301295389383, 0.417811484224327)	0.000125127	0.00158018	LumA	T	3.29e-116	609	0.53
DESMOND	optimized	METABRIC	0.303629	6	559	0.874096	DOWN	ESR1 MUC1 NME3 TTC8 BBS4 MYO6	MB-5482 MB-5483 MB-5135 MB-5138 MB-0540 MB-0542 MB-0462 MB-0467 MB-0464 MB-7104 MB-0238 MB-0230 MB-4881 MB-6178 MB-6272 MB-3528 MB-6187 MB-6182 MB-2742 MB-5236 MB-6188 MB-4888 MB-3165 MB-0152 MB-0150 MB-0157 MB-0155 MB-0093 MB-3046 MB-5465 MB-0658 MB-0659 MB-4993 MB-0656 MB-5468 MB-0653 MB-4395 MB-4254 MB-0593 MB-4770 MB-0381 MB-7267 MB-2922 MB-2923 MB-5213 MB-7078 MB-2929 MB-2513 MB-7071 MB-7070…	(0.14675993504382798, 0.4604987853226008)	0.000148468	0.00177359	LumA	T	1.82e-107	666	0.49
DESMOND	optimized	METABRIC	0.358528	6	513	0.866521	UP	VASN AARS ASNS PSAT1 ENO1 PHGDH	MB-5482 MB-5483 MB-5481 MB-5135 MB-5138 MB-0542 MB-0467 MB-0464 MB-7104 MB-0238 MB-7102 MB-0230 MB-6178 MB-6272 MB-6329 MB-3528 MB-6184 MB-6182 MB-2742 MB-5236 MB-6188 MB-4888 MB-3165 MB-0152 MB-0150 MB-0157 MB-7031 MB-3046 MB-5465 MB-0658 MB-0659 MB-4993 MB-4992 MB-0656 MB-5468 MB-0653 MB-4254 MB-4250 MB-0590 MB-4770 MB-0381 MB-4126 MB-7267 MB-0389 MB-2922 MB-2923 MB-4782 MB-7078 MB-2929 MB-5222…	(0.19789621361860926, 0.519159410957373)	1.21646e-05	0.000537677	Basal	F	2.43e-105	190	0.36
DESMOND	optimized	METABRIC	0.328528	6	947	0.855174	UP	UBE2C TRRAP CDC20 AURKA UBE2S ANAPC2	MB-0392 MB-5482 MB-5483 MB-2613 MB-5481 MB-5486 MB-5485 MB-5135 MB-5646 MB-5641 MB-5138 MB-5139 MB-0545 MB-0469 MB-0468 MB-0541 MB-5039 MB-0462 MB-6359 MB-6358 MB-0467 MB-0466 MB-0465 MB-0464 MB-7104 MB-7100 MB-0238 MB-0236 MB-7109 MB-0230 MB-4417 MB-4881 MB-6178 MB-4849 MB-6272 MB-4846 MB-3525 MB-6329 MB-3528 MB-4418 MB-6184 MB-4323 MB-4324 MB-6183 MB-2742 MB-4886 MB-6188 MB-6189 MB-7258 MB-6007…	(0.1869893356623077, 0.4700668615476594)	5.3823e-06	0.000396496	LumA	T	7.75e-124	581	0.55
DESMOND	optimized	METABRIC	0.211532	6	761	0.850577	UP	BLM PPM1B FANCG KIF15 FANCD2 AURKB	MB-5482 MB-2613 MB-5486 MB-5485 MB-5135 MB-5138 MB-5039 MB-0462 MB-5035 MB-6358 MB-0467 MB-0464 MB-0238 MB-7109 MB-0230 MB-4417 MB-5231 MB-6272 MB-0149 MB-4846 MB-3525 MB-3528 MB-4418 MB-6184 MB-4323 MB-4324 MB-6183 MB-2742 MB-5236 MB-6188 MB-6189 MB-4888 MB-4802 MB-6007 MB-3167 MB-3165 MB-7269 MB-0526 MB-5102 MB-5260 MB-0150 MB-5266 MB-3046 MB-0095 MB-5465 MB-0658 MB-5463 MB-5502 MB-0656 MB-5468…	(0.06977243748545914, 0.35329150473433946)	0.00344859	0.0197958	LumA	T	1.05e-103	617	0.51
DESMOND	optimized	METABRIC	0.232303	6	777	0.848818	UP	RAVER1 CDC25B CDC20 FOXM1 AURKB LIN54	MB-0268 MB-5482 MB-5485 MB-5135 MB-5130 MB-5647 MB-5641 MB-5642 MB-0545 MB-0469 MB-0542 MB-0462 MB-5035 MB-6358 MB-0464 MB-7104 MB-0238 MB-7109 MB-0230 MB-4417 MB-5231 MB-6179 MB-6178 MB-4849 MB-6272 MB-0149 MB-4846 MB-3525 MB-4418 MB-6184 MB-4324 MB-4328 MB-2742 MB-5236 MB-6188 MB-6189 MB-4888 MB-3167 MB-3165 MB-7269 MB-0526 MB-5102 MB-0152 MB-5260 MB-0150 MB-5266 MB-0095 MB-5465 MB-0658 MB-5463…	(0.09032793916927756, 0.3742780295965111)	0.00134155	0.00988274	LumA	T	2.44e-115	623	0.53
DESMOND	optimized	METABRIC	0.22964	6	811	0.844774	UP	GSG2 EIF3B FBXL6 MCM4 MCM2 AURKB	MB-5482 MB-2613 MB-5481 MB-5486 MB-5484 MB-5485 MB-5135 MB-5647 MB-5641 MB-5642 MB-5139 MB-0545 MB-5039 MB-0462 MB-6359 MB-6358 MB-0465 MB-0464 MB-7104 MB-7100 MB-0238 MB-0236 MB-7109 MB-0230 MB-4417 MB-5231 MB-6179 MB-6178 MB-4849 MB-6272 MB-4961 MB-0149 MB-4846 MB-4418 MB-6184 MB-4324 MB-6183 MB-2742 MB-5236 MB-6188 MB-6189 MB-7258 MB-6007 MB-3167 MB-3165 MB-6008 MB-0152 MB-5260 MB-0150 MB-5266…	(0.08819019165954711, 0.37108949256681867)	0.00146287	0.0103826	LumA	T	2.91e-94	594	0.5
DESMOND	optimized	METABRIC	0.2828	6	745	0.841489	UP	KIF18A KIF23 ENO1 MCM2 CSE1L GMPS	MB-5482 MB-5481 MB-5486 MB-5485 MB-5135 MB-5130 MB-5641 MB-5138 MB-0469 MB-0542 MB-0462 MB-5035 MB-6358 MB-0467 MB-0464 MB-0336 MB-7107 MB-7100 MB-0238 MB-0236 MB-7109 MB-0230 MB-5231 MB-6178 MB-6272 MB-4846 MB-3525 MB-2932 MB-6184 MB-6182 MB-6183 MB-2742 MB-5236 MB-2745 MB-6188 MB-7258 MB-3165 MB-7269 MB-0526 MB-6049 MB-5102 MB-0152 MB-5260 MB-0150 MB-5266 MB-5267 MB-3046 MB-7144 MB-5465 MB-4998…	(0.14010366110755862, 0.4254954458084051)	0.000102615	0.00137442	LumA	T	4.63e-109	626	0.52
DESMOND	optimized	METABRIC	0.324585	6	508	0.840075	UP	GTPBP4 LSM2 WDR12 POLR1C DKC1 RBM28	MB-5482 MB-5135 MB-0397 MB-5138 MB-0469 MB-0542 MB-6359 MB-0465 MB-0464 MB-7104 MB-0238 MB-0236 MB-0230 MB-6178 MB-6272 MB-3525 MB-3528 MB-6184 MB-4323 MB-6182 MB-2742 MB-6188 MB-3165 MB-0439 MB-0152 MB-5266 MB-3046 MB-5465 MB-4998 MB-0658 MB-4993 MB-5502 MB-0656 MB-5468 MB-0653 MB-4395 MB-7149 MB-4254 MB-0590 MB-4770 MB-7267 MB-5215 MB-2923 MB-5213 MB-7078 MB-2927 MB-7075 MB-2513 MB-7070 MB-7072…	(0.16222945512267858, 0.4869408418833736)	8.91372e-05	0.00131316	Basal	F	7.51e-84	176	0.33
DESMOND	optimized	METABRIC	0.255657	6	753	0.838842	UP	RFC4 TIMELESS MCM7 MCM6 CDK2 MCM3	MB-5482 MB-2613 MB-5486 MB-5485 MB-5135 MB-5130 MB-5641 MB-5138 MB-0545 MB-0469 MB-0541 MB-0542 MB-0462 MB-5035 MB-6358 MB-0467 MB-0465 MB-0464 MB-7104 MB-0238 MB-0234 MB-7109 MB-0230 MB-5231 MB-6179 MB-4849 MB-6272 MB-4961 MB-0149 MB-4846 MB-4968 MB-6184 MB-4323 MB-4324 MB-6183 MB-2742 MB-5236 MB-2745 MB-6188 MB-6189 MB-4888 MB-4802 MB-6007 MB-3165 MB-3355 MB-6049 MB-6008 MB-0152 MB-5260 MB-0150…	(0.11372361821257226, 0.3975904913620395)	0.000414967	0.00374317	LumA	T	6.19e-84	600	0.49
DESMOND	optimized	METABRIC	0.405713	7	615	0.858804	DOWN	IGF1R SHC1 ESR1 IRS1 IL6ST ITPR1 BCL2	MB-5482 MB-5483 MB-5135 MB-5138 MB-0462 MB-6358 MB-0467 MB-0465 MB-0464 MB-7104 MB-0238 MB-0234 MB-0230 MB-5231 MB-6178 MB-6272 MB-3528 MB-6182 MB-2742 MB-5236 MB-6188 MB-5238 MB-6007 MB-3165 MB-0152 MB-0150 MB-0157 MB-7031 MB-3046 MB-5465 MB-0658 MB-0659 MB-4993 MB-4992 MB-0656 MB-0657 MB-5468 MB-0652 MB-0653 MB-4254 MB-0593 MB-0590 MB-0599 MB-0598 MB-0383 MB-0381 MB-4126 MB-0389 MB-2922 MB-2923…	(0.255353378755765, 0.5560721881051105)	1.23293e-07	2.72478e-05	LumA	T	7.05e-97	647	0.49
DESMOND	optimized	METABRIC	0.21475	7	850	0.855109	UP	RECQL4 CENPF BLM TERF1 FOXM1 MCM2 FANCD2	MB-5482 MB-2613 MB-3606 MB-5486 MB-0147 MB-5485 MB-5135 MB-5641 MB-5138 MB-0469 MB-5039 MB-0462 MB-6358 MB-0467 MB-0465 MB-0464 MB-0336 MB-7107 MB-7100 MB-0238 MB-7109 MB-0230 MB-4417 MB-5231 MB-6179 MB-6178 MB-4849 MB-6272 MB-0149 MB-4846 MB-3525 MB-3528 MB-4418 MB-6184 MB-4323 MB-4324 MB-6183 MB-2742 MB-5236 MB-6188 MB-6189 MB-4888 MB-4802 MB-6007 MB-3167 MB-3165 MB-7269 MB-0526 MB-5102 MB-5260…	(0.07444185545935283, 0.35505851353086015)	0.00270121	0.0160408	LumA	T	7.26e-105	593	0.52
DESMOND	optimized	METABRIC	0.235207	7	674	0.850639	UP	CENPO CENPN CENPM CENPI CENPA MTFR1 ARL5B	MB-5482 MB-5483 MB-5481 MB-5486 MB-5485 MB-5135 MB-5130 MB-5641 MB-5138 MB-0545 MB-0469 MB-0542 MB-0462 MB-6358 MB-0467 MB-0466 MB-0465 MB-0464 MB-7104 MB-0238 MB-7109 MB-0230 MB-5231 MB-6178 MB-6272 MB-6184 MB-6182 MB-6183 MB-2742 MB-5236 MB-6188 MB-7258 MB-6007 MB-3165 MB-7269 MB-3355 MB-5102 MB-0152 MB-5260 MB-0150 MB-5266 MB-7031 MB-0093 MB-3046 MB-7144 MB-5465 MB-0658 MB-5463 MB-4993 MB-5502…	(0.08887006688945842, 0.38154488007117354)	0.00163136	0.0110932	LumA	T	4.01e-119	651	0.52
DESMOND	optimized	METABRIC	0.255565	7	817	0.849582	UP	PLK1 TUBA1B TUBA1A CDC20 MCM2 AURKB TK1	MB-0268 MB-5482 MB-2613 MB-5481 MB-5485 MB-5135 MB-5130 MB-5641 MB-5138 MB-5139 MB-0545 MB-0469 MB-0541 MB-5039 MB-0462 MB-5035 MB-6358 MB-0466 MB-0465 MB-0464 MB-0238 MB-0236 MB-7109 MB-0230 MB-5231 MB-6179 MB-6178 MB-4849 MB-6272 MB-4961 MB-0149 MB-4846 MB-3525 MB-4418 MB-6184 MB-4324 MB-6183 MB-2742 MB-5236 MB-6188 MB-6189 MB-5433 MB-7258 MB-3167 MB-3165 MB-7269 MB-0526 MB-5102 MB-0152 MB-5260…	(0.1142295481382187, 0.39690052580000756)	0.000394049	0.00362854	LumA	T	1.91e-117	614	0.53
DESMOND	optimized	METABRIC	0.31598	8	678	0.840033	DOWN	IGF1R SGK3 KCTD6 ESR1 NEDD4L FLNB GATA3 USP21	MB-5482 MB-5483 MB-5135 MB-5138 MB-0469 MB-0540 MB-3429 MB-0462 MB-0460 MB-0467 MB-0465 MB-0464 MB-7104 MB-0238 MB-0239 MB-0236 MB-0230 MB-5231 MB-6178 MB-6272 MB-4843 MB-3528 MB-6182 MB-2742 MB-5236 MB-6246 MB-6188 MB-5238 MB-4059 MB-0352 MB-3165 MB-0526 MB-0152 MB-0150 MB-5266 MB-7031 MB-0155 MB-0093 MB-3046 MB-5465 MB-0658 MB-0659 MB-4993 MB-4992 MB-0656 MB-0657 MB-5468 MB-0652 MB-0653 MB-7256…	(0.166618059200082, 0.4653413756812307)	3.37786e-05	0.000735039	LumA	T	7.22e-99	634	0.5
DESMOND	optimized	METABRIC	0.205923	9	897	0.841436	UP	DHX9 FAM131B MAD2L1 CCNA2 PLK1 UBE2C TYMS AURKA TOP2A	MB-0392 MB-5482 MB-5483 MB-2613 MB-5481 MB-5486 MB-5485 MB-5135 MB-2838 MB-5646 MB-5641 MB-5138 MB-5139 MB-0545 MB-0469 MB-0541 MB-0542 MB-0462 MB-5035 MB-6358 MB-0467 MB-0466 MB-0465 MB-0464 MB-0336 MB-0238 MB-0234 MB-7109 MB-0230 MB-4881 MB-4965 MB-4849 MB-6272 MB-6036 MB-4846 MB-3525 MB-3528 MB-6184 MB-6182 MB-6183 MB-2742 MB-4886 MB-2745 MB-6188 MB-6189 MB-3165 MB-7140 MB-5102 MB-0152 MB-5260…	(0.06518133269181225, 0.34666421290503213)	0.00413495	0.0228456	LumA	T	2.63e-123	596	0.55
DESMOND	optimized	METABRIC	0.269363	10	939	0.845449	UP	STIL DNAJA1 CCNA2 UBE2C EIF2AK2 FEN1 MCM2 CDCA5 PTTG1 TAGLN2	MB-0392 MB-5482 MB-2613 MB-5481 MB-5486 MB-0147 MB-5485 MB-5135 MB-5641 MB-5138 MB-5139 MB-0545 MB-0469 MB-0541 MB-5039 MB-0462 MB-5035 MB-6358 MB-0467 MB-0466 MB-0465 MB-0464 MB-7104 MB-7107 MB-6145 MB-7100 MB-0238 MB-0236 MB-0234 MB-7109 MB-0230 MB-4417 MB-4881 MB-6179 MB-6178 MB-4849 MB-6272 MB-6036 MB-4846 MB-3525 MB-3528 MB-6184 MB-4323 MB-4324 MB-6183 MB-2742 MB-4886 MB-6188 MB-6189 MB-7258…	(0.1282222655030932, 0.41050354507355813)	0.000183629	0.00193247	LumA	T	2.4e-140	598	0.57
DESMOND	optimized	METABRIC	0.306953	10	575	0.840001	UP	PPM1G STMN1 UBE2C NUP93 POP1 DKC1 SRPK1 SHMT2 NUP205 GMPS	MB-5482 MB-5483 MB-5485 MB-5135 MB-5130 MB-5138 MB-0469 MB-0541 MB-0542 MB-6358 MB-0464 MB-7104 MB-0238 MB-7109 MB-0230 MB-5231 MB-6178 MB-6272 MB-0149 MB-3525 MB-6184 MB-6182 MB-2742 MB-5236 MB-6188 MB-7258 MB-3165 MB-5102 MB-0152 MB-0150 MB-5266 MB-3046 MB-5465 MB-0658 MB-4993 MB-5502 MB-4991 MB-5468 MB-0653 MB-4395 MB-7260 MB-6077 MB-4254 MB-7250 MB-0590 MB-4770 MB-0385 MB-7267 MB-2922 MB-2923…	(0.15280448980742303, 0.46110140541047795)	9.50707e-05	0.00131316	LumA	T	1.99e-110	665	0.5
DESMOND	optimized	METABRIC	0.298553	11	822	0.843949	UP	STIL MCM10 NUP62 TUBA1B CCNE1 CDC37 MCM4 MCM3 MCM2 AURKB CDCA5	MB-5482 MB-2613 MB-5481 MB-5486 MB-5485 MB-5135 MB-6048 MB-5641 MB-5138 MB-5139 MB-0545 MB-0469 MB-5039 MB-0462 MB-5035 MB-6358 MB-0467 MB-0465 MB-0464 MB-7104 MB-0238 MB-7109 MB-0230 MB-4417 MB-5231 MB-6179 MB-6178 MB-4849 MB-6272 MB-0149 MB-4846 MB-3525 MB-2932 MB-6184 MB-4324 MB-6183 MB-2742 MB-5236 MB-6188 MB-6189 MB-5433 MB-7258 MB-6007 MB-3606 MB-3165 MB-0526 MB-6008 MB-0152 MB-5260 MB-0150…	(0.1574969223641298, 0.43960824802848464)	3.34838e-05	0.000735039	LumA	T	3.82e-126	620	0.54
DESMOND	optimized	METABRIC	0.192382	11	747	0.841212	UP	ODF2 CCNA2 PLK1 CEP55 PLK4 TTK NEK2 USP6NL NDC80 UBE2S KIF14	MB-5482 MB-5483 MB-5486 MB-5485 MB-5135 MB-5641 MB-5138 MB-5139 MB-0545 MB-0469 MB-5039 MB-0462 MB-5035 MB-6358 MB-0467 MB-0466 MB-0464 MB-7104 MB-0238 MB-7109 MB-5231 MB-6178 MB-4849 MB-6272 MB-0149 MB-4846 MB-3525 MB-2932 MB-6184 MB-4324 MB-6183 MB-2742 MB-5236 MB-6188 MB-6189 MB-6007 MB-3165 MB-7269 MB-6008 MB-0152 MB-0150 MB-5266 MB-0093 MB-3046 MB-7144 MB-5465 MB-0658 MB-5502 MB-0656 MB-5468…	(0.04858535972562211, 0.33617898909759636)	0.00873675	0.0424356	LumA	T	1.67e-136	647	0.54
DESMOND	optimized	METABRIC	0.214645	12	836	0.853155	UP	GINS3 MCM10 TIMELESS MCM7 MCM6 MCM5 MCM4 MCM3 MCM2 TOP2A ASF1B CDC7	MB-5482 MB-2613 MB-3606 MB-5486 MB-5485 MB-5135 MB-5130 MB-5641 MB-5138 MB-5139 MB-0545 MB-0469 MB-0541 MB-0542 MB-0462 MB-5035 MB-6358 MB-0467 MB-0465 MB-0464 MB-7104 MB-7107 MB-0238 MB-0234 MB-7109 MB-0230 MB-5231 MB-6179 MB-4965 MB-4849 MB-6272 MB-0149 MB-4846 MB-4968 MB-4969 MB-4418 MB-6184 MB-4323 MB-4324 MB-6183 MB-2742 MB-5236 MB-6188 MB-6189 MB-7258 MB-4802 MB-6007 MB-2901 MB-3167 MB-3165…	(0.07429689164054418, 0.35499340671412594)	0.00272186	0.0160408	LumA	T	1.02e-103	596	0.52
DESMOND	optimized	METABRIC	0.312004	12	486	0.843157	DOWN	GAMT XBP1 ESR1 CIRBP AHNAK FOS ANKHD1 MYB HSD17B4 GATA3 CREBBP SIN3A	MB-5482 MB-5483 MB-5135 MB-5138 MB-0540 MB-0462 MB-0467 MB-0464 MB-7104 MB-0238 MB-0230 MB-5231 MB-6178 MB-6272 MB-3528 MB-6182 MB-2742 MB-5236 MB-6188 MB-3165 MB-0152 MB-0150 MB-0157 MB-0093 MB-3046 MB-5465 MB-0658 MB-0659 MB-4993 MB-0656 MB-5468 MB-0652 MB-4254 MB-0593 MB-0599 MB-4770 MB-0381 MB-4126 MB-7267 MB-2922 MB-2923 MB-5213 MB-7078 MB-2929 MB-2513 MB-5222 MB-0906 MB-7073 MB-0901 MB-5602…	(0.14930313063870826, 0.4747058526573238)	0.000170916	0.00184256	LumA	T	2.84e-97	672	0.47
DESMOND	optimized	METABRIC	0.232819	15	667	0.849741	UP	STIL CCNE1 SKP2 LIN9 CDC25B CDC25A NSUN2 CCNB1 CDC20 ESPL1 AURKB FOXM1 CDCA8 E2F3 CBX5	MB-5482 MB-0147 MB-5485 MB-5135 MB-5138 MB-0542 MB-0462 MB-6358 MB-0467 MB-0464 MB-7104 MB-0238 MB-7109 MB-0230 MB-4417 MB-5231 MB-6179 MB-6178 MB-6272 MB-4846 MB-3525 MB-4418 MB-6184 MB-4323 MB-4324 MB-2742 MB-5236 MB-6188 MB-6189 MB-7258 MB-3167 MB-3165 MB-6008 MB-5260 MB-0150 MB-0157 MB-3046 MB-7144 MB-5465 MB-0658 MB-5463 MB-5502 MB-0656 MB-5468 MB-5505 MB-0653 MB-4395 MB-7260 MB-6077 MB-6075…	(0.08653697817160688, 0.379101020004468)	0.001812	0.0119538	LumA	T	1.19e-111	647	0.51
DESMOND	optimized	METABRIC	0.228502	15	886	0.84068	UP	STIL DNAJA1 STMN1 ASPM UBE2C PHF19 BLM TYMS EZH2 MCM2 TUBA1B PTTG1 CSNK2B KIF2C TOP2A	MB-3567 MB-5482 MB-2613 MB-5481 MB-5486 MB-5485 MB-5135 MB-2838 MB-5641 MB-5138 MB-5139 MB-0545 MB-0469 MB-0541 MB-0542 MB-0462 MB-5035 MB-6358 MB-0467 MB-0466 MB-2853 MB-0464 MB-0336 MB-0238 MB-0234 MB-7109 MB-0230 MB-4141 MB-4881 MB-4965 MB-4849 MB-6272 MB-0149 MB-4846 MB-3525 MB-3528 MB-4793 MB-6184 MB-4323 MB-6182 MB-6183 MB-2742 MB-4886 MB-2745 MB-6188 MB-6189 MB-7258 MB-3165 MB-7140 MB-6049…	(0.08806963353816652, 0.36893456476139175)	0.00142707	0.0103404	LumA	T	2.41e-126	602	0.55
DESMOND	optimized	METABRIC	0.294338	16	749	0.845269	UP	GINS3 FBXO5 STMN1 E2F2 HSPA9 H2AFX CDC20 TTK POP1 MCM2 AURKB WDR62 NDC80 SHMT2 KIF2C AURKA	MB-5482 MB-5481 MB-5485 MB-5135 MB-5641 MB-5138 MB-0545 MB-0469 MB-0542 MB-0462 MB-5035 MB-6358 MB-0467 MB-0464 MB-0336 MB-0238 MB-7109 MB-0230 MB-4417 MB-5231 MB-6179 MB-6178 MB-6272 MB-0149 MB-4846 MB-3525 MB-4418 MB-6184 MB-4324 MB-6183 MB-2742 MB-5236 MB-6188 MB-6189 MB-7258 MB-6007 MB-3606 MB-3165 MB-0526 MB-6008 MB-0152 MB-5260 MB-0150 MB-5266 MB-3046 MB-7144 MB-5465 MB-0658 MB-5463 MB-4993…	(0.15145663053461306, 0.43721883322711746)	5.40095e-05	0.000994675	LumA	T	2.86e-130	642	0.54
DESMOND	optimized	METABRIC	-0.228506	16	948	0.8388	DOWN	LMNB2 TMPO LMNB1 NUSAP1 OIP5 DHFR ZWINT KIF23 RACGAP1 CDK2 GRB2 ESPL1 MCM2 PTTG1 PRC1 E2F2	MB-5489 MB-7215 MB-7217 MB-7216 MB-7219 MB-7218 MB-5484 MB-5134 MB-7212 MB-5130 MB-5645 MB-5646 MB-5647 MB-5640 MB-5642 MB-0544 MB-3344 MB-0540 MB-3341 MB-3429 MB-0463 MB-6359 MB-0460 MB-5033 MB-6297 MB-7276 MB-7107 MB-7106 MB-7101 MB-7100 MB-0239 MB-0235 MB-0232 MB-0233 MB-0339 MB-0231 MB-4967 MB-6179 MB-4962 MB-6271 MB-4961 MB-4845 MB-6171 MB-4843 MB-4969 MB-4882 MB-3526 MB-3412 MB-0166 MB-2749…	(-0.369405949380672, -0.08760655381073346)	0.00147987	0.0103826	LumA	F	3.44e-116	571	0.54
DESMOND	optimized	METABRIC	0.185805	18	813	0.840913	UP	MCM10 NUSAP1 NUF2 RACGAP1 CDCA7 CDC25A EXO1 PLK4 KIF23 SFN CDC25C CEP70 MCM2 AURKB DKC1 FAM64A DTL CHEK1	MB-5482 MB-2613 MB-5481 MB-5486 MB-0147 MB-5485 MB-5135 MB-5641 MB-5138 MB-0545 MB-0469 MB-0542 MB-0462 MB-5035 MB-6358 MB-0467 MB-0464 MB-0336 MB-7107 MB-7100 MB-0238 MB-7109 MB-0230 MB-5231 MB-6178 MB-6272 MB-0149 MB-4846 MB-3525 MB-4418 MB-6184 MB-4323 MB-4324 MB-6183 MB-2742 MB-5236 MB-6188 MB-6189 MB-7258 MB-3165 MB-7269 MB-0526 MB-6049 MB-6008 MB-0152 MB-5260 MB-0150 MB-5266 MB-7031 MB-3046…	(0.04402409604182153, 0.3275857229824759)	0.0102125	0.0470202	LumA	T	4.5e-133	628	0.55
DESMOND	optimized	METABRIC	0.321999	24	757	0.839248	UP	UBQLN1 STMN1 PLK1 KIF14 FOXM1 FAM83D TPX2 CCNA2 TUBA1C ERCC6L HSPD1 AURKA AURKB CHEK1 HMMR IARS SUPT16H CDC25A CENPA MCM4 MCM2 UBE2C CDC20 PPIF	MB-5482 MB-5483 MB-5481 MB-5486 MB-5485 MB-5135 MB-5641 MB-5138 MB-5139 MB-0545 MB-0469 MB-0542 MB-0462 MB-6358 MB-0467 MB-0466 MB-0465 MB-0464 MB-0336 MB-0238 MB-0236 MB-7109 MB-0230 MB-5231 MB-6178 MB-6272 MB-0149 MB-4846 MB-3525 MB-6184 MB-4324 MB-6183 MB-2742 MB-5236 MB-6188 MB-6189 MB-7258 MB-3165 MB-7269 MB-0526 MB-6008 MB-0152 MB-5260 MB-0150 MB-5266 MB-3046 MB-7144 MB-5465 MB-0658 MB-5463…	(0.17906448280191634, 0.4649340820915233)	1.00847e-05	0.000537677	LumA	T	5.39e-141	648	0.55
DESMOND	optimized	METABRIC	0.290517	26	780	0.841864	UP	EXO1 BIRC5 CEP55 FEN1 FANCD2 PRC1 FAM83D CCNA2 CCNE1 AURKA AURKB CDCA8 TOP2A INCENP CKS2 CDC25A IFI30 BLM MCM2 SRPK1 KLRG2 TFG GSK3B FOXM1 CHEK1 CKAP5	MB-5482 MB-2613 MB-5481 MB-5486 MB-5485 MB-5135 MB-5641 MB-5138 MB-0545 MB-0469 MB-5039 MB-0462 MB-5035 MB-6358 MB-0467 MB-0465 MB-0464 MB-7104 MB-7107 MB-0238 MB-7109 MB-0230 MB-5231 MB-6178 MB-6272 MB-0149 MB-4846 MB-3525 MB-6184 MB-4324 MB-6183 MB-2742 MB-5236 MB-6188 MB-6189 MB-6007 MB-3165 MB-7269 MB-0526 MB-6008 MB-0152 MB-5260 MB-0150 MB-5266 MB-3046 MB-7144 MB-5465 MB-4998 MB-0658 MB-5463…	(0.14825595387562948, 0.4327788014780948)	6.26725e-05	0.00102597	LumA	T	2.4e-147	647	0.56
DESMOND	optimized	METABRIC	0.270871	26	756	0.839473	UP	STMN1 HUWE1 EZH2 KIF2C TPX2 RBPJ CDCA2 FANCE AURKA AURKB CDCA5 CDCA8 ASF1B MAPRE2 INCENP CEP55 CDC25B CENPA MCM7 MCM6 MCM4 MCM2 CDC20 MELK CHEK1 EWSR1	MB-5482 MB-2613 MB-3606 MB-5486 MB-0147 MB-5485 MB-5135 MB-5641 MB-5138 MB-0545 MB-0469 MB-5039 MB-0462 MB-6358 MB-0467 MB-0465 MB-0464 MB-7104 MB-0238 MB-7109 MB-0230 MB-4417 MB-5231 MB-6178 MB-6272 MB-0149 MB-4846 MB-3525 MB-4418 MB-6184 MB-4324 MB-6183 MB-2742 MB-5236 MB-6188 MB-6189 MB-3165 MB-7269 MB-0526 MB-6008 MB-0152 MB-5260 MB-0150 MB-5266 MB-3046 MB-0095 MB-5465 MB-0658 MB-5463 MB-4993…	(0.12855911441412976, 0.4131825362761273)	0.000191083	0.00196416	LumA	T	2.67e-135	644	0.54
DESMOND	optimized	METABRIC	0.281313	30	882	0.840155	UP	DTL PLK1 CEP55 KIF14 FAM64A PRC1 DCTN1 KIF2C NEK2 EXO1 TTK POLD1 AURKA AURKB MTMR4 CDC25A ASF1B YWHAE HMMR MCM10 CDC25C CENPE SPAG5 MCM3 MCM2 SLC25A11 CCNB1 KIF23 TOP2A CKAP2L	MB-5482 MB-5481 MB-5486 MB-0147 MB-5485 MB-5135 MB-5646 MB-5641 MB-5138 MB-5139 MB-0545 MB-0469 MB-0542 MB-0462 MB-5035 MB-6358 MB-0467 MB-0466 MB-0465 MB-0464 MB-0336 MB-7107 MB-7100 MB-0238 MB-7109 MB-0230 MB-4417 MB-5231 MB-6179 MB-6178 MB-4849 MB-6272 MB-0149 MB-4846 MB-3525 MB-4418 MB-6184 MB-4323 MB-4324 MB-6183 MB-2742 MB-5236 MB-2745 MB-6188 MB-6189 MB-5433 MB-7258 MB-4802 MB-6007 MB-3606…	(0.14097417975969065, 0.42165216817032614)	8.53712e-05	0.00130926	LumA	T	2.8e-127	604	0.55
DESMOND	optimized	METABRIC	-0.275047	48	936	0.840671	DOWN	TMPO DTL PLK1 ZWINT CEP55 PKMYT1 KIF11 SLC25A19 KIAA0101 PRC1 KIF2C FAM83D LTBR NUSAP1 ECT2 FAM91A1 RACGAP1 EXO1 KIF4A AURKB CENPF CDCA8 YWHAG ASF1B TOP2A YWHAZ OIP5 CDC25C CKS2 CDC25A CDCA5 CENPA MAP7D2 MCM3 MCM2 CCNA2 UNK KRAS LMNB2 CCNB2 CCNB1 LMNB1 UBE2C KIF23 MELK UBE2T SPC25 KIF20A	MB-5489 MB-7215 MB-7217 MB-7216 MB-7219 MB-7218 MB-5484 MB-5134 MB-7212 MB-5130 MB-5645 MB-5646 MB-5647 MB-5640 MB-5642 MB-0544 MB-0468 MB-0540 MB-3341 MB-3429 MB-0463 MB-6359 MB-0460 MB-5033 MB-6297 MB-7106 MB-7101 MB-0239 MB-0235 MB-0232 MB-0233 MB-0339 MB-0231 MB-4967 MB-4965 MB-4962 MB-6271 MB-6273 MB-4845 MB-6171 MB-4843 MB-4969 MB-3526 MB-5398 MB-3412 MB-6187 MB-4322 MB-6185 MB-6181 MB-4328…	(-0.4162084473406235, -0.13388467528363618)	0.000134055	0.0016459	LumA	F	5.1e-137	586	0.57
DESMOND	optimized	METABRIC	0.271143	58	924	0.840842	UP	MAD2L1 DTL PLK1 ZWINT CEP55 PLK4 PKMYT1 FEN1 FBXO5 FANCD2 PRC1 NDC80 KIF2C DNTTIP1 STIL NEK2 ECT2 RACGAP1 ASPM EXO1 ANAPC11 CKS1B CDC37 TTK AURKA AURKB CENPF PTTG1 CENPE TOP2A WDR5 BUB1 OIP5 DIAPH3 CDC25C CKS2 CDC25A CDCA5 CENPA SDCCAG3 BLM MCM2 CCNA2 TRIP13 CCNB2 CCNB1 SHCBP1 FOXM1 TFG KIF23 CDC20 UBE2C CSE1L UBE2S KIF20A UBE2T SPC25 CKAP5	MB-0392 MB-5482 MB-2613 MB-5481 MB-5486 MB-5485 MB-5135 MB-2838 MB-5641 MB-5138 MB-5139 MB-0545 MB-0469 MB-5039 MB-0462 MB-5035 MB-6358 MB-0467 MB-0466 MB-0465 MB-0464 MB-7104 MB-7107 MB-7100 MB-0238 MB-0236 MB-0234 MB-7109 MB-0230 MB-4417 MB-4881 MB-6179 MB-6178 MB-4849 MB-6272 MB-6036 MB-4846 MB-3525 MB-3528 MB-6184 MB-4323 MB-4324 MB-6183 MB-2742 MB-4886 MB-2745 MB-6188 MB-6189 MB-7258 MB-6007…	(0.13019487658172305, 0.412090968463639)	0.000162987	0.00184172	LumA	T	1.73e-138	601	0.57
DESMOND	optimized	METABRIC	0.281216	66	840	0.840526	UP	MAD2L1 PLK1 ZWINT BIRC5 CEP55 PLK4 PKMYT1 FOXM1 FBXO5 PRC1 ATAD2 NDC80 CBX2 KIF2C TTK STIL SKP2 NUSAP1 RACGAP1 ASPM ANAPC11 KIF4A CDCA2 RAD51AP1 ESPL1 AURKA AURKB CDCA5 PTTG1 CDCA8 MAPRE1 CDC25A TROAP CENPO INCENP MCM10 BUB1 NUF2 CDC25C CKS2 CENPE ANLN KIF18A TPX2 CENPA SDCCAG3 NEK2 CASC5 CCNA2 TRIP13 PACS2 UBR5 FDPS CCNB1 CCNB2 CDC27 UBE2C BYSL KIF23 CDC20 HIST1H2BG DNM1L UBE2S TOP2A SPC25 KIF20A	MB-5482 MB-5483 MB-5481 MB-5486 MB-5485 MB-5135 MB-5641 MB-5138 MB-5139 MB-0545 MB-0469 MB-0542 MB-0462 MB-5035 MB-6358 MB-0467 MB-0466 MB-0465 MB-0464 MB-0336 MB-7100 MB-0238 MB-7109 MB-0230 MB-4417 MB-5231 MB-6178 MB-6272 MB-0149 MB-4846 MB-3525 MB-3528 MB-2932 MB-6184 MB-4324 MB-6183 MB-2742 MB-5236 MB-6188 MB-6189 MB-7258 MB-6007 MB-3165 MB-7269 MB-0526 MB-5102 MB-0152 MB-5260 MB-0150 MB-5266…	(0.14021302509271336, 0.42221940545936665)	9.27002e-05	0.00131316	LumA	T	2.66e-151	635	0.57
